# Supplementary material for: Volatile Cues Influence Host-Choice in Arthropod Pests
Source: Animals (Basel). 2020 Oct 28;10(11):1984. doi: 10.3390/ani10111984 (PMC7692281; doi:10.3390/ani10111984)
Supplement: Supplementary file 1 [file animals-10-01984-s001.xlsx]

## Sheet: all VOCs from all species
compound type	CAS number	analyte (without numbers)	analyte	formula	molecular mass	molecular weight	number of species from which analyte is reported	Asian elephant (Elaphas maximus)	African elephant (Loxodonta africana)	Domestic horse (Equus equus)	Wild horse (Equus caballus)	Donkey (Equus asinus)	Red hartebeest (Alcelaphus buselaphus caama)	Blackbuck (Antelope cervicapra)	Springbok (Antidorcas marsupialis)	Domestic cattle (Bos taurus)	Asian water Buffalo (Bubalus bubalis)	Domestic goat (Capra aegagrus hircus)	Blue duiker (Cephalophus monticola)	Natal red duiker (Cephalophus natalensis)	Bontebok (Damaliscus dorcas dorcas)	Blesbok (Damaliscus dorcas phillipsi)	Suni (Neotragus moschatus)	Klipspringer (Oreotragus oreotragus)	Muskox (Ovibos moschatus)	Oribi (Ourebia ourebi)	Cape grysbok (Raphicerus melanotis)	Grey duiker (Sylvicapra grimmia)	Bison (Bison bison)	African buffalo (Syncerus caffer)	Gaur (Bos guarus)	Waterbuck (Kobus defessa)	Sheep (Ovis aries)	Warthog urine (Phacochoerus aethiopicus)	Domestic pig (Sus scrofa)	Pronghorn antelope (Antilocapra americana)	Bactrian camel (Camelus bactrianus)	Arabian camel (Camelus dromedarius)	Alaskan moose (Alces alces gigas)	West European red deer (Cervus elaphus)	Sika deer (Cervus nippon)	Siberian musk deer (Moschus rnoschiferus)	Columbian black-tailed deer (Odocoileus hemionus columbianus)	White-tailed deer (Odocoileus virginianus)	Reindeer (Rangifer tarandus tarandus)	Reticulated giraffe (Giraffa camelopardalis reticulata)	White-lipped peccary (Tayassu pecari)	Collared peccary (Tayassu tajacu)	Human (Homo sapiens)
acids	64-19-7	acetic acid / ethanoic acid	Acetic acid / ethanoic acid	C2H4O2	60.0211	60.052	22							1		1		1															1												1				1
acids	65-85-0	benzoic acid / benzenecarboxylic acid	benzoic acid / benzenecarboxylic acid	C7H6O2	122.037	122.123	12		1									1																					1	1									1
acids	na	bovidic acid 18-(6S,9R,10R)-	18-(6S,9R,10R)-bovidic acid	C18H34O4	314.246	314.466	1																								1
acids	110-15-6	butanedioic acid 1,4- / succinic acid	1,4-butanedioic acid / succinic acid	C4H6O4	118.027	118.088	2									1																																	1
acids	107-92-6	butanoic acid	butanoic acid / butyric acid	C4H8O2	88.0524	88.106	23				1					1		1															1												1				1
acids	110-17-8	Butenedioic acid (E)-2- / fumaric acid	(E)-2-butenedioic acid / fumaric acid	C4H4O4	116.011	116.072	1
acids	98-89-5	cyclohexane carboxylic acid	cyclohexane carboxylic acid	C7H12O2	128.084	128.171	4						1			1																								1									1
acids	334-48-5	decanoic acid / capric acid	decanoic acid / capric acid / caprinic acid	C10H20O2	172.146	172.268	20										1	1			1	1										1			1						1						1		1
acids	ui	Decenoic acid	decenoic acid	C10H18O2	170.131	170.252	1
acids	na	diethyldodecanoic acid 4,10-	4,10-diethyldodecanoic acid	C16H32O2	256.24	256.43	1											1
acids	na	diethyldodecanoic acid 4,8-	4,8-diethyldodecanoic acid	C16H32O2	256.24	256.43	1											1
acids	1070-83-3	dimethylbutanoic acid 3,3-	3,3-dimethylbutanoic acid	C6H12O2	116.084	116.16	1			1
acids	20170-32-5	ditertbutyl-4-hydroxyphenol)propanoic acid 3-(3,5-	3-(3,5-ditertbutyl-4-hydroxyphenol)propanoic acid	C17H26O3	278.188	278.392	2
acids	17735-98-7	Docosadienoic acid (Z,Z)-13,16-	(Z,Z)-13,16-docosadienoic acid	C22H40O2	336.303	336.56	4
acids	112-85-6	Docosanoic acid / behenic acid	docosanoic acid / behenic acid	C22H44O2	340.334	340.592	6																														1
acids	112-86-7	Docosenoic acid / erucic acid (Z)-13-	(Z)-13-docosenoic acid / erucic acid	C22H42O2	338.318	338.576	5
acids	143-07-7	dodecanoic acid / lauric acid	dodecanoic acid / lauric acid	C12H24O2	200.178	200.322	25											1			1	1						1							1						1						1		1
acids	22032-47-9	Dodecenoic acid (Z)-9-	(Z)-9-dodecenoic acid	C12H22O2	198.162	198.306	1
acids	2091-39-6	eicosadienoic acid cis-11,14-	cis-11,14-eicosadienoic acid	C20H36O2	308.272	308.506	3
acids	506-30-9	eicosanoic acid / arachidic acid	eicosanoic acid / arachidic acid / arachic acid	C20H40O2	312.303	312.538	12																														1
acids	17046-59-2 (Z,Z,Z)	Eicosatrienoic acid 11,14,17-	11,14,17-eicosatrienoic acid (ui)	C20H34O2	306.256	306.49	1
acids	1783-84-2	eicosatrienoic acid cis-8,11,14-	cis-8,11,14-eicosatrienoic acid	C20H34O2	306.256	306.49	2
acids	ui	eicosenoic acid	eicosenoic acid	C20H38O2	310.287	310.522	2
acids	5561-99-9	Eicosenoic acid / gondoic acid (Z)-11-	(Z)-11-eicosenoic acid / gondoic acid	C20H38O2	310.287	310.522	3
acids	na	ethyl-10-methyldodecanoic acid 4-	4-ethyl-10-methyldodecanoic acid	C15H30O2	242.225	242.403	1											1
acids	na	ethyl-11-methyldodecanoic acid 4-	4-ethyl-11-methyldodecanoic acid	C15H30O2	242.225	242.403	1											1
acids	na	ethyl-8-methyldecanoic acid 4-	4-ethyl-8-methyldecanoic acid	C13H26O2	214.193	214.349	1											1
acids	na	ethyl-9-methylundecanoic acid 4-	4-ethyl-9-methylundecanoic acid	C14H28O2	228.209	228.376	1											1
acids	2874-76-2	ethyldecanoic acid 2-	2-ethyldecanoic acid	C12H24O2	200.178	200.322	1											1
acids	25234-31-5	ethyldecanoic acid 4-	4-ethyldecanoic acid	C12H24O2	200.178	200.322	2											1																															1
acids	2874-75-1	ethyldodecanoic acid 2-	2-ethyldodecanoic acid	C14H28O2	228.209	228.376	1											1
acids	80480-06-4	ethyldodecanoic acid 4-	4-ethyldodecanoic acid	C14H28O2	228.209	228.376	1											1
acids	na	ethyldodecanoic acid 6-	6-ethyldodecanoic acid	C14H28O2	228.209	228.376	1											1
acids	na	ethyldodecanoic acid 8-	8-ethyldodecanoic acid	C14H28O2	228.209	228.376	1											1
acids	na	ethylhexadecanoic acid 12-	12-ethylhexadecanoic acid	C18H36O2	284.272	284.484	1											1
acids	54240-85-6	ethylhexadecanoic acid 2-	2-ethylhexadecanoic acid	C18H36O2	284.272	284.484	1											1
acids	80480-08-6	ethylhexadecanoic acid 4-	4-ethylhexadecanoic acid	C18H36O2	284.272	284.484	1											1
acids	149-57-5	ethylhexanoic acid 2-	2-ethylhexanoic acid	C8H16O2	144.115	144.214	7											1																															1
acids	6299-66-7	ethylhexanoic acid 4-	4-ethylhexanoic acid	C8H16O2	144.115	144.214	1											1
acids	na	ethyloctadecanoic acid 4-	4-ethyloctadecanoic acid	C20H40O2	312.303	312.538	1											1
acids	25234-25-7	ethyloctanoic acid 2-	2-ethyloctanoic acid	C10H20O2	172.146	172.268	1											1
acids	16493-80-4	ethyloctanoic acid 4-	4-ethyloctanoic acid	C10H20O2	172.146	172.268	2											1																															1
acids	na	ethyloctanoic acid 6-	6-ethyloctanoic acid	C10H20O2	172.146	172.268	1											1
acids	25354-93-2	ethyltetradecanoic acid 2-	2-ethyltetradecanoic acid	C16H32O2	256.24	256.43	1											1
acids	80480-07-5	ethyltetradecanoic acid 4-	4-ethyltetradecanoic acid	C16H32O2	256.24	256.43	1											1
acids	na	ethyltetradecanoic acid 6-	6-ethyltetradecanoic acid	C16H32O2	256.24	256.43	1											1
acids	na	ethylundecanoic acid 4-	4-ethylundecanoic acid	C13H26O2	214.193	214.349	1											1
acids	64-18-6	formic acid	formic acid	CH2O2	46.0055	46.025	2																																										1
acids	506-26-3	g-linolenic acid	g-linolenic acid	C18H30O2	278.225	278.436	2
acids	528-16-5	Glucuronic acid	glucuronic acid	C6H10O7	194.043	194.139	1
acids	2363-71-5	Heneicosanoic acid	heneicosanoic acid	C21H42O2	326.318	326.565	4																														1
acids	506-12-7	heptadecanoic acid	heptadecanoic acid / margaric acid	C17H34O2	270.256	270.457	14											1			1	1															1				1								1
acids	29743-97-3	heptadecenoic acid cis-10-	cis-10-heptadecenoic acid	C17H32O2	268.24	268.441	2
acids	111-14-8	heptanoic acid	heptanoic acid / enanthic acid	C7H14O2	130.099	130.187	14						1			1		1			1	1										1									1								1
acids	5070-03-01	Hexadecadienoic acid (Z,Z)-9,12-	(Z,Z)-9,12-hexadecadienoic acid	C16H28O2	252.209	252.398	2														1	1
acids	‎57-10-3	hexadecanoic acid / palmitic acid	hexadecanoic acid / palmitic acid	C16H32O2	256.24	256.43	52				1		1			1	1	1			1	1			1		1	1							1		1				1					1	1		1
acids	373-49-9	hexadecenoic acid 9- / palmitoleic acid	9-hexadecenoic acid / palmitoleic acid	C16H30O2	254.225	254.414	12											1																													1		1
acids	142-62-1	hexanoic acid	hexanoic acid / caproic acid	C6H12O2	116.084	116.16	27						1			1		1			1	1										1					1				1				1		1		1
acids	13419-69-7	hexenoic acid (E)-2-	(E)-2-hexenoic acid	C6H10O2	114.068	114.144	1											1
acids	69-72-7	Hydroxybenzoic acid 2- / salicylic acid	2-hydroxybenzoic acid / salicylic acid	C7H6O3	138.032	138.122	1							1
acids	501-97-3	Hydroxyphenyl 3-p- propionic acid 3- / (p-Hydroxyphenyl)-propionic acid 3- / phloretic acid	3-(p-hydroxyphenyl)propionic acid / phloretic acid	C9H10O3	166.063	166.176	2
acids	156-38-7	Hydroxyphenylacetic acid p-	p-hydroxyphenylacetic acid	C8H8O3	152.047	152.149	2
acids	506-32-1	Icosatetraenoic acid (Z,Z,Z,Z)-5,8,11,14- / arachidonic acid	(Z,Z,Z,Z)-5,8,11,14-icosatetraenoic acid / arachidonic acid	C20H32O2	304.23	304.474	3
acids	503-74-2	isovaleric acid / 3-methylbutanoic acid	isovaleric acid / 3-methylbutanoic acid	C5H10O2	102.068	102.133	24									1																	1			1	1							1	1				1
acids	506-21-8	linolelaidic acid / (E,E)-9,12-octadecadienoic acid	linolelaidic acid / (E,E)-9,12-octadecadienoic acid	C18H32O2	280.24	280.452	2
acids	‎463-40-1	linolenic acid	linolenic acid	C18H30O2	278.225	278.436	3
acids	104-01-8	Methoxyphenylacetic acid 4-	4-methoxyphenylacetic acid	C9H10O3	166.063	166.176	1
acids	119-36-8	methyl salicylate	methyl salicylate	C8H8O3	152.047	152.149	4			1																																							1
acids	13201-46-2	Methyl-2-butenoic acid 2-	2-methyl-2-butenoic acid	C5H8O2	100.052	100.117	3														1	1
acids	541-47-9	Methyl-2-butenoic acid 2-	3-methyl-2-butenoic acid	C5H8O2	100.052	100.117	1
acids	79-41-4	methyl-2-propenoic acid 2-	2-methyl-2-propenoic acid	C4H6O2	86.0368	86.09	2
acids	116-53-0	methylbutanoic acid 2-	2-methylbutanoic acid	C5H10O2	102.068	102.133	18				1							1																		1									1		1		1
acids	2445-78-5	Methylbutyl-2-methylbutanoate 2-	2-methylbutyl-2-methylbutanoate	C10H20O2	172.146	172.268	1
acids	24323-23-7	Methyldecanoic acid 2-	2-methyldecanoic acid	C11H22O2	186.162	186.295	3																																								1
acids	7421-34-3	methyldodecanoic acid 10- /aneiso-tridecanoic acid	10-methyldodecanoic acid /anteiso-tridecanoic acid	C13H26O2	214.193	214.349	1											1
acids	5681-98-1	methyldodecanoic acid 11- / iso-tridecanoic acid	11-methyldodecanoic acid / iso-tridecanoic acid	C13H26O2	214.193	214.349	1											1
acids	36332-93-1	Methyleicosanoic acid 18-	18-methyleicosanoic acid	C21H42O2	326.318	326.565	8
acids	59708-73-5	Methyleicosanoic acid 19-	19-methyleicosanoic acid	C21H42O2	326.318	326.565	1
acids	2724-58-5	Methylheptadecanoic acid 16-	16-methylheptadecanoic acid	C18H36O2	284.272	284.484	1						1
acids	25103-52-0	Methylheptanoic acid 6- / isooctanoic acid	6-methylheptanoic acid / isooctanoic acid	C8H16O2	144.115	144.214	3						1
acids	5918-29-6	methylhexadecanoic acid 14- / anteiso-heptadecanoic acid	14-methylhexadecanoic acid / anteiso-heptadecanoic acid	C17H34O2	270.256	270.457	4											1																							1
acids	1603-03-8	methylhexadecanoic acid 15- / iso-heptadecanoic acid	15-methylhexadecanoic acid / iso-heptadecanoic acid	C17H34O2	270.256	270.457	3											1																							1
acids	1561-11-1	methylhexanoic acid 4-	4-methylhexanoic acid	C7H14O2	130.099	130.187	1
acids	1330-19-4	Methylhexanoic acid 5- / isoheptanoic acid	5-methylhexanoic acid / isoheptanoic acid	C7H14O2	130.099	130.187	1
acids	6250-72-2	Methylnonadecanoic acid 18-	18-methylnonadecanoic acid	C20H40O2	312.303	312.538	1
acids	24323-21-5	Methylnonanoic acid 2-	2-methylnonanoic acid	C10H20O2	172.146	172.268	1
acids	17001-28-4	methyloctadecanoic acid 16- / anteiso-nonadecanoic acid	16-methyloctadecanoic acid / anteiso-nonadecanoic acid	C19H38O2	298.287	298.511	1											1
acids	2724-59-6	methyloctadecanoic acid 17- / iso-nonadecanoic acid	17-methyloctadecanoic acid / iso-nonadecanoic acid	C19H38O2	298.287	298.511	2											1
acids	693-19-6	Methyloctanoic acid 7- / isopelargonic acid	7-methyloctanoic acid / isopelargonic acid	C9H18O2	158.131	158.241	1						1
acids	4669-02-7	methylpentadecanoic acid 14- / iso-hexadecanoic acid	14-methylpentadecanoic acid / iso-hexadecanoic acid	C16H32O2	256.24	256.43	4						1					1																							1
acids	646-07-1	methylpentanoic acid 4-	4-methylpentanoic acid / isohexanoic acid	C6H12O2	116.084	116.16	13																																						1				1
acids	79-31-2	methylpropanoic acid 2-	2-methylpropanoic acid / isobutyric acid	C4H8O2	88.0524	88.106	21									1		1															1											1	1				1
acids	ui	methyltetradecanoic acid	methyltetradecanoic acid	C15H30O2	242.225	242.403	1				1
acids	5502-94-3	methyltetradecanoic acid 12- / anteiso-pentadecanoic acid	12-methyltetradecanoic acid / anteiso-pentadecanoic acid	C15H30O2	242.225	242.403	1											1
acids	2485-71-4	methyltetradecanoic acid 13- / iso-pentadecanoic acid	13-methyltetradecanoic acid / iso-pentadecanoic acid	C15H30O2	242.225	242.403	3											1																							1
acids	32391-97-2	Methylthio -4 butanoic acid / (Methylthio)butanoic acid 4-	4-(methylthio)butanoic acid	C5H10O2S	134.04	134.193	1
acids	29709-05-5	Methyltridecanoic acid 11-	11-methyltridecanoic acid	C14H28O2	228.209	228.376	1
acids	2724-57-4	methyltridecanoic acid 12- / iso-tetradecanoic acid	12-methyltridecanoic acid / iso-tetradecanoic acid	C14H28O2	228.209	228.376	2											1																							1
acids	2724-56-3	methylundecanoic acid 10- / iso-dodecanoic acid	10-methylundecanoic acid / iso-dodecanoic acid	C12H24O2	200.178	200.322	1											1
acids	24323-25-9	Methylundecanoic acid 2-	2-methylundecanoic acid	C12H24O2	200.178	200.322	1
acids	544-64-9	myristoleic acid	myristoleic acid	C14H26O2	226.193	226.36	1
acids	646-30-0	nonadecanoic acid	nonadecanoic acid	C19H38O2	298.287	298.511	5																														1
acids	112-05-0	nonanoic acid	nonanoic acid / pelargonic acid	C9H18O2	158.131	158.241	13						1					1														1									1						1		1
acids	60-33-3	octadecadienoic acid (9Z,12Z)-9,12- / linoleic acid	9,12-octadecatrienoic acid / linoleic acid	C18H32O2	280.24	280.452	19											1			1	1													1						1								1
acids	57-11-4	octadecanoic acid	octadecanoic acid / stearic acid	C18H36O2	284.272	284.484	42						1			1		1			1	1			1		1	1									1				1								1
acids	112-79-8	Octadecenoic acid (E)-9- / elaidic acid	(E)-9-octadecenoic acid / elaidic acid	C18H34O2	282.256	282.468	4
acids	13126-37-9	octadecenoic acid (Z)-12-	(Z)-12-octadecenoic acid	C18H34O2	282.256	282.468	1											1
acids	112-80-1	octadecenoic acid (Z)-9-	(Z)-9-octadecenoic acid / oleic acid	C18H34O2	282.256	282.468	29											1			1	1			1			1
acids	2197-55-9	octadecenoic acid 8-	8-octadecenoic acid	C18H34O2	282.256	282.468	2
acids	2027-47-6	octadecenoic acid 9- / oleic acid	9-octadecenoic acid / oleic acid	C18H34O2	282.256	282.468	9										1																		1												1		1
acids	124-07-2	octanoic acid	octanoic acid / caprylic acid	C8H16O2	144.115	144.214	20						1					1														1									1						1		1
acids	541-50-4	oxobutanoic acid 3-/ acetoacetic acid	3-oxobutanoic acid / acetoacetic acid	C4H6O3	102.032	102.089	1																										1
acids	506-38-7	Pentacosanoic acid	pentacosanoic acid	C25H50O2	382.381	382.673	1																														1
acids	1002-84-2	pentadecanoic acid	pentadecanoic acid	C15H30O2	242.225	242.225	22				1							1			1	1															1				1						1		1
acids	109-52-4	pentanoic acid / valeric acid	pentanoic acid / valeric acid	C5H10O2	102.068	102.133	21						1			1		1															1								1				1				1
acids	103-82-2	Phenylacetic acid 2- / benzeneacetic acid	2-Phenylacetic acid / benzeneacetic acid	C8H8O2	136.052	136.15	10											1																						1							1		1
acids	501-52-0	Phenylpropanoic acid 3- / benzenepropanoic acid	3-Phenylpropanoic acid / benzenepropanoic acid	C9H10O2	150.068	150.177	9		1																															1							1
acids	79-09-4	propionic acid / propanoic acid	propionic acid / propanoic acid	C3H6O2	74.0368	74.079	20									1		1															1												1				1
acids	557-59-5	Tetracosanoic acid / lignoceric acid	tetracosanoic acid / lignoceric acid	C24H48O2	368.365	368.646	5
acids	506-37-6	Tetracosenoic acid (Z)-15- / nervonic acid	(Z)-15-tetracosenoic acid / nervonic acid	C24H46O2	366.35	366.63	2
acids	544-63-8	tetradecanoic acid / myristic acid	tetradecanoic acid / myristic acid	C14H28O2	228.209	228.376	37				1						1	1			1	1			1			1							1						1					1	1		1
acids	2433-96-7	Tricosanoic acid	tricosanoic acid	C23H46O2	354.35	354.619	4																														1
acids	638-53-9	tridecanoic acid	tridecanoic acid	C13H26O2	214.193	214.349	8											1																							1								1
acids	na	triethyldecanoic acid 2,4,8-	2,4,8-triethyldecanoic acid	C16H32O2	256.24	256.43	1											1
acids	na	triethyldodecanoic acid 2,4,10-	2,4,10-triethyldodecanoic acid	C18H36O2	284.272	284.484	1											1
acids	na	triethyloctanoic acid 2,4,6-	2,4,6-triethyloctanoic acid	C14H28O2	228.209	228.376	1											1
acids	112-37-8	Undecanoic acid	undecanoic acid	C11H22O2	186.162	186.295	7																																		1								1
alcohols	106-24-1	(E)-3,7-Dimethyl-2,6-octadien-1-ol / geraniol	(E)-3,7-dimethyl-2,6-octadien-1-ol / geraniol	C10H18O	154.136	154.253	6												1
alcohols	77899-11-7	(Z,Z)-6,9-Pentadecadien-1-ol	(Z,Z)-6,9-pentadecadien-1-ol	C15H28O	224.214	224.388	2																			1	1
alcohols	2639-53-4	5alpha-Androst-2-en-17beta-ol	5α-androst-2-en-17beta-ol	C19H30O	274.23	274.448	1	1
alcohols	54632-04-1	Albicanol	albicanol	C15H26O	222.198	222.372	1		1
alcohols	598-07-2	alpha-linalool / 3,7-dimethylocta-1,7-dien-3-ol	alpha-linalool / 3,7-dimethylocta-1,7-dien-3-ol	C10H18O	154.136	154.253	1
alcohols	1153-51-1	androst-16-en-3a-ol 5α-	5α-androst-16-en-3a-ol	C19H30O	274.23	274.448	1																												1
alcohols	7148-51-8	androst-16-en-3β-ol 5α-	5α-androst-16-en-3β-ol	C19H30O	274.23	274.448	2																												1			1
alcohols	108-46-3	Benzenediol 1,3- / resorcinol	1,3-benzenediol / resorcinol	C6H6O2	110.037	110.112	1
alcohols	122-97-4	Benzenepropanol	benzenepropanol	C9H12O	136.089	136.194	1
alcohols	100-51-6	benzyl alcohol	benzyl alcohol / phenylmethanol	C7H8O	108.058	108.14	8									1																																	1
alcohols	71-36-3	butanol 1-	1-butanol	C4H10O	74.0732	74.123	6																												1														1
alcohols	78-92-2	butanol 2- / sec-butanol; sec-butyl alcohol	2-butanol / sec-butanol; sec-butyl alcohol	C4H10O	74.0732	74.123	3									1																																	1
alcohols	3913-02-8	Butyl-1-octanol 2-	2-Butyl-1-octanol	C12H26O	186.198	186.339	1
alcohols	57-88-5	Cholest-5-en-3beta-ol / cholesterol	cholest-5-en-3β-ol / cholesterol	C27H46O	386.355	386.664	13		1														1		1																1								1
alcohols	6036-58-4	Cholest-7-en-3beta-ol / 7-cholesterol	cholest-7-en-3β-ol / 7-cholesterol	C27H46O	386.355	386.664	1
alcohols	79-63-0	Cholest-8,24(5alpha)-dien-4,4,14alpha-trimethyl-3beta-ol / lanosterol	cholest-8,24(5α)-dien-4,4,14α-trimethyl-3β-ol / lanosterol	C30H50O	426.386	426.729	1
alcohols	14214-69-8	Cholesta-4,6-dien-3-ol	cholesta-4,6-dien-3-ol	C27H44O	384.339	384.648	1
alcohols	313-04-2	Cholesta-5,24-dien-3beta-ol / desmosterol	cholesta-5,24-dien-3β-ol / desmosterol	C27H44O	384.339	384.648	1
alcohols	80-97-7	Cholestan-3-ol	cholestan-3-ol	C27H48O	388.37	388.68	1
alcohols	2919-23-5	cyclobutanol	cyclobutanol	C4H8O	72.0575	72.107	5																												1
alcohols	16326-97-9	cyclopentane-1,3-diol (1R,3S)- / cis-1,3-cyclopentanediol	(1R,3S)-cyclopentane-1,3-diol / cis-1,3-cyclopentanediol	C5H10O2	102.068	102.133	1
alcohols	1197-01-9	cymen-8-ol p- / 1-Methyl-4-(1-hydroxy-1-methylethyl)-benzene	p-cymen-8-ol / 1-Methyl-4-(1-hydroxy-1-methylethyl)-benzene	C10H14O	150.105	150.221	2														1	1
alcohols	112-30-1	Decan-1-ol / 1-decanol	1-decanol / decan-1-ol	C10H22O	158.167	158.285	2																		1																								1
alcohols	1120-06-5	decanol 2-	2-decanol / decan-2-ol	C10H22O	158.167	158.285	3									1			1																														1
alcohols	2051-31-2	decanol 4- / Decan-4-ol	4-decanol / decan-4-ol	C10H22O	158.167	158.285	1												1
alcohols	22104-80-9	decen-1-ol 2-	2-decen-1-ol	C10H20O	156.151	156.269	2			1																																							1
alcohols	3293-47-8	dihydro-b-ionol	dihydro-β-ionol	C13H24O	196.183	196.334	1			1
alcohols	123-31-9	Dihydroxybenzene 1,4-/ hydroquinone	1,4-dihydroxybenzene / hydroquinone	C6H6O2	110.037	110.112	1
alcohols	110-03-2	dimethyl-2,5-hexanediol 2,5-	2,5-dimethyl-2,5-hexanediol	C8H18O2	146.131	146.23	1										1
alcohols	18479-58-8	Dimethyl-7-octen-2-ol 2,6- / dihydromyrcenol	2,6-dimethyl-7-octen-2-ol / dihydromyrcenol	C10H20O	156.151	156.269	3							1																																			1
alcohols	617-94-7	dimethylbenzenemethanol α,α-	α,α-dimethylbenzenemethanol	C9H12O	136.089	136.194	3			1						1
alcohols	33933-80-1	Dimethylnonan-1-ol 4,8-	4,8-dimethylnonan-1-ol	C11H24O	172.183	172.312	1
alcohols	661-19-8	Docosan-1-ol	docosan-1-ol	C22H46O	326.355	326.609	2														1	1
alcohols	112-53-8	Dodecanol 1-	1-Dodecanol	C12H26O	186.198	186.339	6																				1														1				1				1
alcohols	20056-92-2	Dodecen-1-ol (Z)-7-	(Z)-7-Dodecen-1-ol	C12H24O	184.183	184.323	1	1
alcohols	na	Drimane-8alpha,11-diol	Drimane-8alpha,11-diol	C15H28O2	240.209	240.387	1		1
alcohols	629-96-9	Eicosan-1-ol	Eicosan-1-ol	C20H42O	298.324	298.555	4
alcohols	19903-73-2	Epicedrol	Epicedrol	C15H26O	222.198	222.372	1
alcohols	64-17-5	ethanol	ethanol	C2H6O	46.0419	46.069	5																												1														1
alcohols	104-76-7	ethyl-1-hexanol 2-	2-ethyl-1-hexanol	C8H18O	130.136	130.231	7									1		1											1																				1
alcohols	7733-91-7	geranyl isopropyl alcohol ???	geranyl isopropyl alcohol / geranyl isopropanol	C13H24O	196.183	196.334	2			1																																							1
alcohols	15594-90-8	Heneicosan-1-ol	Heneicosan-1-ol	C21H44O	312.339	312.582	2														1	1
alcohols	121232-91-5	Heneicosan-2-ol	Heneicosan-2-ol	C21H44O	312.339	312.582	1
alcohols	na	Heptadecadien-1-ol (Z,Z)-8,10-	(Z,Z)-8,10-Heptadecadien-1-ol	C17H32O	252.245	252.442	1																				1
alcohols	16813-18-6	Heptadecan-2-ol	Heptadecan-2-ol	C17H36O	256.277	256.474	1
alcohols	na	Heptadecane-1,2-diol	Heptadecane-1,2-diol	C17H36O2	272.272	272.473	1
alcohols	1454-85-9	Heptadecanol 1-	1-Heptadecanol	C17H36O	256.277	256.474	3				1
alcohols	na	Heptadecen-1-ol (Z)-8-	(Z)-8-Heptadecen-1-ol	C17H34O	254.261	254.458	1																				1
alcohols	589-82-2	Heptan-3-ol	Heptan-3-ol	C7H16O	116.12	116.204	1												1
alcohols	589-55-9	Heptan-4-ol	Heptan-4-ol	C7H16O	116.12	116.204	1												1
alcohols	111-70-6	heptanol 1-	1-heptanol	C7H16O	116.12	116.204	3									1																																	1
alcohols	543-49-7	heptanol 2-	2-heptanol	C7H16O	116.12	116.204	3			1						1			1
alcohols	na	Hexadecadien-1-ol (Z,Z)-7,10-	(Z,Z)-7,10-Hexadecadien-1-ol	C16H30O	238.23	238.415	1																			1
alcohols	na	Hexadecane-2,3-diol (2S,3R)-	(2S,3R)-Hexadecane-2,3-diol	C16H34O2	258.256	258.446	1
alcohols	6920-24-7	hexadecanediol 1,2-	1,2-hexadecanediol / hexadecane-1,2-diol	C16H34O2	258.256	258.446	2																										1
alcohols	36653-82-4	hexadecanol 1-	1-hexadecanol / hexadecan-1-ol	C16H34O	242.261	242.447	14										1																								1				1				1
alcohols	ui	Hexadecen-1-ol	Hexadecen-1-ol	C16H32O	240.245	240.431	1
alcohols	111-27-3	hexanol 1-	1-hexanol / hexan-1-ol	C6H14O	102.105	102.177	6																																										1
alcohols	626-93-7	hexanol 2-	2-hexanol / hexan-2-ol	C6H14O	102.105	102.177	3												1																														1
alcohols	623-37-0	hexanol 3-	3-hexanol / hexan-3-ol / ethyl propyl carbinol	C6H14O	102.105	102.177	4									1			1																														1
alcohols	928-94-9	hexen-1-ol (Z)-2-	(Z)-2-hexen-1-ol	C6H12O	100.089	100.092	1			1
alcohols	928-96-1	hexen-1-ol (Z)-3-	(Z)-3-hexen-1-ol	C6H12O	100.089	100.092	2									1
alcohols	121-71-1	hydroxy-acetophenone 3- / acetylphenol	3-hydroxyacetophenone / 3-acetylphenol	C8H8O2	136.052	136.15	2			1
alcohols	78-70-6	linalool	linalool / 2,6-Dimethyl-2,7-octadien-6-ol	C10H18O	154.136	154.253	8			1						1					1	1											1																1
alcohols	562-74-3	Menth-1-en-4-ol p- / terpinen-4-ol	p-Menth-1-en-4-ol / terpinen-4-ol	C10H18O	154.136	154.253	1
alcohols	7786-67-6	Menth-8-en-3-ol / isopulegol p-	p-Menth-8-en-3-ol / isopulegol	C10H18O	154.136	154.253	1
alcohols	99-48-9	Mentha-1,8-dien-6-ol p-	p-Mentha-1,8-dien-6-ol / carveol	C10H16O	152.12	152.237	1
alcohols	498-81-7	Menthan-8-ol p-	p-Menthan-8-ol	C10H20O	156.151	156.155	1
alcohols	89-78-1	Menthol	Menthol	C10H20O	156.151	156.269	1
alcohols	67-56-1	methanol	methanol	CH4O	32.0262	32.042	4									1																																	1
alcohols	137-32-6	methyl-1-butanol 2-	2-methyl-1-butanol	C5H12O	88.0888	88.15	2									1																																	1
alcohols	123-51-3	methyl-1-butanol 3- / isoamyl alcohol; isopentanol	3-methyl-1-butanol / isoamyl alcohol; isopentanol	C5H12O	88.0888	88.15	5																																										1
alcohols	78-83-1	methyl-1-propanol 2-	2-methyl-1-propanol	C4H10O	74.0732	74.123	3																												1														1
alcohols	556-82-1	Methyl-2-buten-1-ol 3-	3-Methyl-2-buten-1-ol	C5H10O	86.0732	86.134	2												1
alcohols	625-23-0	methyl-2-hexanol 2-	2-methyl-2-hexanol / 2-Methylhexan-2-ol	C7H16O	116.12	116.204	2				1		1
alcohols	54004-41-0	Methyl-2-propylpentan-1-ol 4-	4-Methyl-2-propylpentan-1-ol	C9H20O	144.151	144.258	1							1
alcohols	763-32-6	Methyl-3-buten-1-ol 3-	3-Methyl-3-buten-1-ol	C5H10O	86.0732	86.134	4												1									1
alcohols	115-18-4	methyl-3-buten-2-ol 2-/ dimethylvinylcarbinol; dimethylvinylmethanol	2-methyl-3-buten-2-ol / dimethylvinylcarbinol; dimethylvinylmethanol	C5H10O	86.0732	86.134	3						1
alcohols	115-19-5	Methyl-3-butyn-2-ol 2-	2-Methyl-3-butyn-2-ol	C5H8O	84.0575	84.118	1							1
alcohols	21129-27-1	Methyl-4-(1-methyethyl) cyclohexanol 1-	1-Methyl-4-(1-methyethyl)cyclohexanol	C10H20O	156.151	156.269	1
alcohols	51174-44-8	Methyl-4-penten-1-ol 3-	3-Methyl-4-penten-1-ol	C6H12O	100.089	100.161	1												1
alcohols	na	Methyl-6-octen-1-ol 3-	3-Methyl-6-octen-1-ol	C9H18O	142.136	142.242	1
alcohols	1462-03-9	methylcyclopentanol 1-	1-methylcyclopentanol	C6H12O	100.089	100.161	2																																										1
alcohols	1653-40-3	methylheptan-1-ol 6-	6-methylheptan-1-ol	C8H18O	130.136	130.231	2						1			1
alcohols	51166-20-2	Methylhexadecan-1-ol 15	15-Methylhexadecan-1-ol	C17H36O	256.277	256.474	1
alcohols	627-98-5	Methylhexan-1-ol 5-	5-Methylhexan-1-ol	C7H16O	116.12	116.204	1						1
alcohols	na	Methylnonan-5-ol 2-	2-Methylnonan-5-ol	C10H22O	158.167	158.285	1												1
alcohols	na	Methyloctan-2-ol 6-	6-Methyloctan-2-ol	C9H20O	144.151	144.258	2
alcohols	20194-48-3	Methylpentadecan-1-ol 14-	14-Methylpentadecan-1-ol	C16H34O	242.261	242.447	2
alcohols	75-65-0	Methylpropan-2-ol 2-	2-Methylpropan-2-ol	C4H10O	74.0732	74.123	1
alcohols	50313-71-8	Methyltetradecan-1-ol 12-	12-Methyltetradecan-1-ol	C15H32O	228.245	228.42	1																													1
alcohols	20194-47-2	Methyltetradecan-1-ol 13-	13-Methyltetradecan-1-ol	C15H32O	228.245	228.42	3																													1
alcohols	1454-84-8	Nonadecan-1-ol	Nonadecan-1-ol	C19H40O	284.308	284.528	1
alcohols	na	Nonadecan-2-ol	Nonadecan-2-ol	C19H40O	284.308	284.528	1
alcohols	628-99-9	Nonan-2-ol	Nonan-2-ol	C9H20O	144.151	144.258	2
alcohols	624-51-1	Nonan-3-ol	Nonan-3-ol	C9H20O	144.151	144.258	1												1
alcohols	143-08-8	nonanol 1-	1-nonanol / nonan-1-ol	C9H20O	144.151	144.258	4			1						1																																	1
alcohols	31502-14-4	nonen-1-ol (E)-2-	(E)-2-nonen-1-ol	C9H18O	142.136	142.242	1			1
alcohols	51494-28-1	nonen-1-ol 3-	3-nonen-1-ol	C9H18O	142.136	142.242	1			1
alcohols	112-92-5	Octadecan-1-ol	Octadecan-1-ol	C18H38O	270.292	270.501	6
alcohols	20294-76-2	octadecanediol 1,2-	1,2-octadecanediol	C18H38O2	286.287	286.5	1																										1
alcohols	143-28-2 (Z)	octadecen-1-ol 9-	9-octadecen-1-ol (ui)	C18H36O	268.277	268.485	1			1
alcohols	589-62-8	Octan-4-ol	Octan-4-ol	C8H18O	130.136	130.231	1												1
alcohols	111-87-5	octanol 1-	1-octanol / octan-1-ol	C8H18O	130.136	130.231	10									1																	1																1
alcohols	123-96-6	octanol 2-	2-octanol / octan-2-ol	C8H18O2	130.136	130.231	3			1						1			1
alcohols	589-98-0	octanol 3-	3-octanol / octan-3-ol	C8H18O	130.136	130.231	5			1						1			1																														1
alcohols	26001-58-1	Octen-1-ol (Z)-2-	(Z)-2-Octen-1-ol	C8H16O	128.12	128.215	1
alcohols	22104-78-5	Octen-1-ol 2- (ui)	2-Octen-1-ol (ui)	C8H16O	128.12	128.215	3
alcohols	3391-86-4	octen-3-ol 1-	1-octen-3-ol	C8H16O	128.12	128.215	7			1						1																																	1
alcohols	629-76-5	Pentadecanol 1-	1-Pentadecanol	C15H32O	228.245	228.42	6																				1														1
alcohols	584-02-1	Pentan-3-ol	Pentan-3-ol	C5H12O	88.0888	88.15	1												1
alcohols	71-41-0	pentanol 1- / n-amyl alcohol	1-pentanol / n-amyl alcohol / pentan-1-ol	C5H12O	88.0888	88.15	9									1																			1														1
alcohols	616-25-1	penten-3-ol 1-	1-penten-3-ol	C5H10O	86.0732	86.134	2
alcohols	104-54-1	Phenyl-2-propen-1-ol 3- / cinnamyl alcohol	3-Phenyl-2-propen-1-ol / cinnamyl alcohol	C9H10O	134.073	134.178	1							1
alcohols	60-12-8	phenylethanol 2-	2-phenylethanol	C8H10O	122.073	122.167	11											1															1														1		1
alcohols	504-63-2	Propanediol 1,3-	1,3-Propanediol	C3H8O2	76.0524	76.095	1
alcohols	4254-14-2	propanediol R-(–)-1,2- / (R)-(–)-Propylene glycol, (R)-(–)-Propylene glycerol	R-(–)-1,2-propanediol / (R)-(–)-Propylene glycol, (R)-(–)-Propylene glycerol	C3H8O2	76.0524	76.095	4
alcohols	56-81-5	Propanetriol 1,2,3- / glycerol	1,2,3-Propanetriol / glycerol	C3H8O3	92.0473	92.094	2																																										1
alcohols	71-23-8	propanol 1-	1-propanol	C3H8O	60.0575	60.096	6									1		1																	1														1
alcohols	67-63-0	propanol 2- / isopropyl alcohol	2-propanol / isopropyl alcohol	C3H8O	60.0575	60.096	8									1																																	1
alcohols	10042-59-8	Propyl Heptanol 2-	2-Propyl Heptanol	C10H22O	158.167	158.285	1
alcohols	98-55-5	terpineol α-	α-terpineol (-) / p-Menth-1-en-8-ol	C10H18O	154.136	154.253	3			1																																							1
alcohols	98-55-5	terpineol α- / 2-(4-Methylcyclohex-3-enyl)-propan-2-ol	α-terpineol / 2-(4-Methylcyclohex-3-enyl)-propan-2-ol	C10H18O	154.136	154.253	3														1	1
alcohols	98-52-2	tert-Butyl Cyclohexanol 4-	4-tert-Butyl Cyclohexanol	C10H20O	156.151	156.269	1
alcohols	13491-79-7	tert-Butyl-cyclohexanol 2-	2-tert-Butyl-cyclohexanol	C10H20O	156.151	156.269	1
alcohols	506-51-4	Tetracosan-1-ol	Tetracosan-1-ol	C24H50O	354.386	354.663	2														1	1
alcohols	na	Tetradecadien-1-ol (Z,Z)-5,8-	(Z,Z)-5,8-Tetradecadien-1-ol	C14H26O	210.198	210.361	2																			1	1
alcohols	112-72-1	Tetradecan-1-ol / tetradecanol	Tetradecan-1-ol / tetradecanol	C14H30O	214.23	214.393	8																				1														1				1
alcohols	64470-32-2	Tetradecen-1-ol (Z)-8-	(Z)-8-Tetradecen-1-ol	C14H28O	212.214	212.377	1																			1
alcohols	35153-15-2	Tetradecen-1-ol (Z)-9-	(Z)-9-Tetradecen-1-ol	C14H28O	212.214	212.377	1
alcohols	24034-73-9	Tetramethyl-2,6,10,14-hexadecatetraen-1-ol (E,E,E)-3,7,11,15- / geranylgeraniol	(E,E,E)-3,7,11,15-Tetramethyl-2,6,10,14-hexadecatetraen-1-ol / geranylgeraniol	C20H34O	290.261	290.491	2																																									1
alcohols	102608-53-7	tetramethyl-2-hexadecene1-ol 3,7,11,15- / phytol	3,7,11,15-tetramethyl-2-hexadecene1-ol / phytol	C20H40O	296.308	296.539	1									1
alcohols	na	Tridecadien-1-ol (Z,Z)-4,7-	(Z,Z)-4,7-Tridecadien-1-ol	C13H24O	196.183	196.334	1																			1
alcohols	112-70-9	Tridecanol 1-	1-Tridecanol	C13H28O	200.214	200.366	3																				1														1
alcohols	7212-44-4	Trimethyl-1,6,10-dodecatrien-3-ol (E)-3,7,11- / trans-nerolidol	(E)-3,7,11-Trimethyl-1,6,10-dodecatrien-3-ol / trans-nerolidol	C15H26O	222.198	222.372	1		1
alcohols	na	Trimethyl-10-dodecen-1,7-diol 3,7,11-	3,7,11-Trimethyl-10-dodecen-1,7-diol	C15H30O2	242.225	242.225	1		1
alcohols	na	Trimethyl-2,10-dodecadien-1,7-diol (E)-3,7,11- / farnesol hydrate	(E)-3,7,11-Trimethyl-2,10-dodecadien-1,7-diol / farnesol hydrate	C15H28O2	240.209	240.387	1		1
alcohols	106-28-5	Trimethyl-2,6,10-dodecatrien-1-ol (E,E)-3,7,11- / (E,E)-farnesol	(E,E)-3,7,11-Trimethyl-2,6,10-dodecatrien-1-ol / (E,E)-farnesol	C15H26O	222.198	222.372	3		1
alcohols	na	Trimethyl-2-dodecen-1,7,11-triol (E)-3,7,11-	(E)-3,7,11-Trimethyl-2-dodecen-1,7,11-triol	C15H30O3	258.219	258.402	1		1
alcohols	51411-24-6	Trimethyl-6,10-dodecadien-1-ol (E)-3,7,11-	(E)-3,7,11-Trimethyl-6,10-dodecadien-1-ol	C15H28O	224.214	224.388	1		1
alcohols	na	Trimethyl-6-dodecene-1,11-diol (E)-3,7,11-	(E)-3,7,11-Trimethyl-6-dodecene-1,11-diol	C15H30O2	242.225	242.225	1		1
alcohols	na	Trimethyldodecane-1,7,11-triol 3,7,11-	3,7,11-Trimethyldodecane-1,7,11-triol	C15H32O3	260.235	260.418	1		1
alcohols	112-42-5	Undecan-1-ol	Undecan-1-ol	C11H24O	172.183	172.312	1
alcohols	1653-30-1	Undecan-2-ol	Undecan-2-ol	C11H24O	172.183	172.312	2
aldehydes	75-07-0	acetaldehyde	acetaldehyde	C2H4O	44.0262	44.053	4									1																																	1
aldehydes	100-52-7	benzaldehyde	benzaldehyde	C7H6O	106.042	106.124	38									1		1							1				1				1											1		1			1
aldehydes	123-72-8	butanal / butyraldehyde; butyric aldehyde	butanal / butyraldehyde; butyric aldehyde	C4H8O	72.0575	72.107	3						1																																				1
aldehydes	123-73-9	butenal 2- / crotonaldehyde	2-butenal / crotonaldehyde	C4H6O	70.0419	70.091	2																																										1
aldehydes	1070-66-2	butylacrolein 2-n- / 2-methylene-hexanal	2-n-butylacrolein / 2-methylene-hexanal	C7H12O	112.088	112.172	2																																										1
aldehydes	104-55-2	Cinnamaldehyde	Cinnamaldehyde	C9H8O	132.058	132.061	1
aldehydes	106-26-3	citral B / neral	citral B / neral	C10H16O	152.12	152.237	1									1
aldehydes	432-25-7	cyclocitral β-	β-cyclocitral	C10H16O	152.12	152.237	1									1
aldehydes	25152-84-5	Decadienal (E,E)-2,4-	(E,E)-2,4-Decadienal	C10H16O	152.12	152.237	2														1	1
aldehydes	na	Decadienal (Z,Z)-2,4-	(Z,Z)-2,4-Decadienal	C10H16O	152.12	152.237	2														1	1
aldehydes	112-31-2	decanal	decanal	C10H20O	156.151	156.269	30			1		1				1		1												1		1	1								1				1				1
aldehydes	3913-81-3	decenal (E)-2-	(E)-2-decenal	C10H18O	154.136	154.253	5					1	1																												1								1
aldehydes	21662-09-9	decenal (Z)-4-	(Z)-4-decenal	C10H18O	154.136	154.253	1
aldehydes	3913-71-1	Decenal 2- (ui)	2-Decenal (ui)	C10H18O	154.136	154.253	2
aldehydes	5779-94-2	dimethylbenzaldehyde 2,5-	2,5-dimethylbenzaldehyde	C9H10O	134.073	134.178	2											1
aldehydes	5973-71-7	Dimethylbenzaldehyde 3,4-	3,4-Dimethylbenzaldehyde	C9H10O	134.073	134.178	1
aldehydes	5779-95-3	dimethylbenzaldehyde 3,5- / m-xylene-5-carboxaldehyde	3,5-dimethylbenzaldehyde / m-xylene-5-carboxaldehyde	C9H10O	134.073	134.178	1
aldehydes	1620-98-0	di-tert-Butyl-4-hydroxybenzaldehyde 3,5-	3,5-di-tert-Butyl-4-hydroxybenzaldehyde	C15H22O2	234.162	234.339	1
aldehydes	112-54-9	dodecanal	dodecanal	C12H24O	184.183	184.323	11			1						1														1											1								1
aldehydes	68820-34-8	Dodecenal (E)-5-	(E)-5-Dodecenal	C12H22O	182.167	182.307	1
aldehydes	21944-98-9	dodecenal (Z)-4-	(Z)-4-dodecenal	C12H22O	182.167	182.307	1
aldehydes	68820-33-7	Dodecenal (Z)-5-	(Z)-5-Dodecenal	C12H22O	182.167	182.307	1
aldehydes	126745-61-7	dodecenal (Z)-6-	(Z)-6-dodecenal	C12H22O	182.167	182.307	1
aldehydes	123-05-7	ethylhexanal 2- / butylethylacetyaldehyde; 2-ethylhexaldehyde	2-ethylhexanal / butylethylacetyaldehyde; 2-ethylhexaldehyde	C8H16O	128.12	128.215	2																																										1
aldehydes	98-01-1	Furan-2-carbaldehyde / furfural	Furan-2-carbaldehyde / furfural	C5H4O2	96.0211	96.085	3
aldehydes	629-90-3	heptadecanal	heptadecanal	C17H34O	254.261	254.458	1
aldehydes	na	Heptadienal (Z,Z)-2,4-	(Z,Z)-2,4-Heptadienal	C7H10O	110.073	110.156	2														1	1
aldehydes	111-71-7	heptanal	heptanal	C7H14O	114.105	114.188	25					1	1		1	1		1			1	1							1	1		1	1								1				1	1			1
aldehydes	18829-55-5	heptenal (E)-2-	(E)-2-heptenal	C7H12O	112.089	112.172	10						1			1					1	1								1		1																	1
aldehydes	629-80-1	hexadecanal	hexadecanal	C16H32O	240.245	240.431	7									1														1																			1
aldehydes	66-25-1	hexanal / caproic aldehyde	hexanal / caproic aldehyde	C6H12O	100.089	100.161	26					1	1		1	1		1			1	1										1			1						1								1
aldehydes	101-86-0	Hexyl Cinnamaldehyde a-	a-Hexyl Cinnamaldehyde	C15H20O	216.151	216.324	1
aldehydes	123-11-5	Methoxybenzaldehyde 4- / p-anisaldehyde	4-Methoxybenzaldehyde / p-anisaldehyde	C8H8O2	136.052	136.15	1
aldehydes	1115-11-3	Methyl-2-butenal 2-	2-Methyl-2-butenal	C5H8O	84.0575	84.118	1
aldehydes	107-86-8	Methyl-2-butenal 3-	3-Methyl-2-butenal	C5H8O	84.0575	84.118	1
aldehydes	na	Methyl-2-decenal (E)-9-	(E)-9-Methyl-2-decenal	C11H20O	168.151	168.28	1						1
aldehydes	na	Methyl-2-decenal (Z)-9-	(Z)-9-Methyl-2-decenal	C11H20O	168.151	168.28	1						1
aldehydes	na	Methyl-2-nonenal (E)-8-	(E)-8-Methyl-2-nonenal	C10H18O	154.136	154.253	1						1
aldehydes	na	Methyl-2-nonenal (Z)-8-	(Z)-8-Methyl-2-nonenal	C10H18O	154.136	154.253	1						1
aldehydes	na	Methyl-2-octenal (E)-7-	(E)-7-Methyl-2-octenal	C9H16O	140.12	140.226	1						1
aldehydes	78-85-3	Methyl-2-propenal 2- / methacrylaldehyde	2-Methyl-2-propenal / methacrylaldehyde	C4H6O	70.0419	70.091	1						1
aldehydes	1118-59-8	Methyl-3-butenal 3-	3-Methyl-3-butenal	C5H8O	84.0575	84.118	1						1
aldehydes	68654-16-0	Methyl-5-heptenal 6-	6-Methyl-5-heptenal	C8H14O	126.105	126.199	1
aldehydes	104-87-0	methylbenzaldehyde 4-	4-methylbenzaldehyde	C8H8O	120.058	120.161	2									1																																	1
aldehydes	96-17-3	methylbutanal 2-	2-methylbutanal	C5H10O	86.0732	86.134	5									1		1																															1
aldehydes	590-86-3	methylbutanal 3- / isopenanal; isovaleric aldehyde	3-methylbutanal / isopenanal; isovaleric aldehyde	C5H10O	86.0732	86.134	13						1			1																												1					1
aldehydes	620-02-0	Methylfurfural 5-	5-Methylfurfural	C6H6O2	110.037	110.112	1
aldehydes	63885-09-6	Methylheptanal 6-	6-Methylheptanal	C8H16O	128.12	128.215	1						1
aldehydes	1860-39-5	Methylhexanal 5-	5-Methylhexanal	C7H14O	114.105	114.188	2						1
aldehydes	58223-46-4	Methylnonanal 7-	7-Methylnonanal	C10H20O	156.151	156.269	1
aldehydes	3085-26-5	Methylnonanal 8-	8-Methylnonanal	C10H20O	156.151	156.269	2						1
aldehydes	30689-75-9	Methyloctanal 6-	6-Methyloctanal	C9H18O	142.136	142.242	1
aldehydes	49824-43-3	Methyloctanal 7-	7-Methyloctanal	C9H18O	142.136	142.242	1						1
aldehydes	1119-16-0	Methylpentanal 4-	4-Methylpentanal	C6H12O	100.089	100.161	1						1
aldehydes	78-84-2	methylpropanal 2- / isobutanal	2-methylpropanal / isobutanal	C4H8O	72.0575	72.107	4									1																																	1
aldehydes	124-19-6	nonanal	nonanal	C9H18O	142.136	142.242	34			1		1	1		1	1		1												1		1	1								1				1	1			1
aldehydes	18829-56-6	nonenal (E)-2-	(E)-2-nonenal	C9H16O	140.12	140.226	7			1			1			1		1														1									1								1
aldehydes	2463-53-8	Nonenal 2- (ui)	2-Nonenal (ui)	C9H16O	140.12	140.226	1
aldehydes	638-66-4	octadecanal	octadecanal	C18H36O	268.277	268.485	3																																										1
aldehydes	124-13-0	octanal	octanal	C8H16O	128.12	128.215	27					1	1		1	1		1			1	1							1	1			1								1				1	1			1
aldehydes	2548-87-0	octenal (E)-2-	(E)-2-octenal	C8H14O	126.105	126.199	10					1	1			1		1			1	1																			1								1
aldehydes	2363-89-5	Octenal 2- (ui)	2-Octenal (ui)	C8H14O	126.105	126.199	1
aldehydes	na	Pentadecadienal (Z,Z)-6,9-	(Z,Z)-6,9-Pentadecadienal	C15H26O	222.198	222.372	1																			1
aldehydes	2765-11-9	pentadecanal	pentadecanal	C15H30O	226.23	226.404	8							1		1														1																			1
aldehydes	110-62-3	pentanal / valeric aldehyde / amyl aldehyde	pentanal / valeric aldehyde / amyl aldehyde	C5H10O	86.0732	86.134	8						1			1																			1														1
aldehydes	122-78-1	phenyl acetaldehyde	phenyl acetaldehyde	C8H8O	120.058	120.151	7									1		1															1																1
aldehydes	123-38-6	propanal	propanal	C3H6O	58.0419	58.08	2																																										1
aldehydes	107-02-8	propenal 2-	2-propenal / acrylaldehyde	C3H4O	56.0262	56.064	3									1																												1					1
aldehydes	na	Tetradecadienal (Z,Z)-5,8-	(Z,Z)-5,8-Tetradecadienal	C14H24O	208.183	208.345	1																			1
aldehydes	124-25-4	tetradecanal	tetradecanal	C14H28O	212.214	212.377	3																																		1								1
aldehydes	169054-69-7	Tetradecenal (Z)-8-	(Z)-8-Tetradecenal	C14H26O	210.198	210.361	1																			1
aldehydes	10486-19-8	tridecanal	tridecanal	C13H26O	198.198	198.35	6									1												1		1											1								1
aldehydes	112-44-7	undecanal	undecanal	C11H22O	170.167	170.296	12			1						1														1		1									1								1
aldehydes	53448-07-0	undecenal (E)-2-	(E)-2-undecenal	C11H20O	168.151	168.28	4						1			1														1																			1
aldehydes	68820-32-6	Undecenal (Z)-4-	(Z)-4-Undecenal	C11H20O	168.151	168.28	1
amino acid	471-09-0	Amino-3-(4-hydroxy-2-methylbutan-2-ylthio)-propanoic acid 2- / felinine	2-Amino-3-(4-hydroxy-2-methylbutan-2-ylthio)-propanoic acid / felinine	C8H17NO3S	207.093	207.288	3
amino acid	617-65-2	Aminopentanedioic acid 2- / glutamic acid	2-Aminopentanedioic acid / glutamic acid	C5H9NO4	147.053	147.13	13
amino acid	660-88-8	Aminopentanoic acid 5- / 5-aminovaleric acid	5-Aminopentanoic acid / 5-aminovaleric acid	C5H11NO2	117.079	117.148	1
amino acid	302-72-7	Aminopropanoic acid 2-/ alanine	2-Aminopropanoic acid / alanine	C3H7NO2	89.0477	89.094	14
amino acid	56-89-3	Cystine	Cystine	C6H12N2O4S2	240.024	240.292	1
amino acid	1118-68-9	dimethylglycine N,N-	N,N-dimethylglycine	C4H9NO2	103.063	103.121	1
amino acid	56-40-6	Glycine	Glycine	C2H5NO2	75.032	75.067	17				1					1		1
amino acid	1190-94-9	hydroxylysine 5-	5-hydroxylysine	C6H14N2O3	162.1	162.189	1									1
amino acid	368-16-1	methylhistidine 3- / 2-Amino-3-(1-methyl-1H-imidazol-5-yl)-propanoic acid	3-methylhistidine / 2-Amino-3-(1-methyl-1H-imidazol-5-yl)-propanoic acid	C7H11N3O2	169.085	169.184	10
amino acid	72-19-5	Threonine	Threonine	C4H9NO3	119.058	119.12	1
anhydride	108-24-7	Acetic anhydride	Acetic anhydride	C4H6O3	102.032	102.089	3
esters/lactones	na	(Heptadecadien-1-yl)-butanolide 4- / 4-heptadecadienyl-butanolide	4-(Heptadecadien-1-yl)-butanolide / 4-heptadecadienyl-butanolide	C21H36O2	320.272	320.517	1
esters/lactones	na	(Hexadecadien-1-yl)-butanolide 4- / 4-hexadecadienyl-butanolide	4-(Hexadecadien-1-yl)-butanolide / 4-hexadecadienyl-butanolide	C20H34O2	306.256	306.49	1
esters/lactones	108-05-4	acetic acid, ethenyl ester / vinyl acetate	acetic acid, ethenyl ester / vinyl acetate	C4H6O2	86.0368	86.09	2																																										1
esters/lactones	141-78-6	acetic acid, ethyl ester / ethyl acetate	acetic acid, ethyl ester / ethyl acetate	C4H8O2	88.0524	88.106	4									1																																	1
esters/lactones	109-60-4	acetic acid, propyl ester / propyl aceate	acetic acid, propyl ester / propyl aceate	C5H10O2	102.068	102.133	3									1																																	1
esters/lactones	6938-94-9	Adipic acid, diisopropyl ester	Adipic acid, diisopropyl ester	C12H22O4	230.152	230.304	1
esters/lactones	2051-78-7	allyl butyrate / 2-propenyl butanoate	allyl butyrate / 2-propenyl butanoate	C7H12O2	128.084	128.169	1									1
esters/lactones	7149-26-0	Anthranilic Acid, 1,5-dimethyl-1-Vinyl-4-hexenyl ester /Linalyl anthranilate	Anthranilic Acid, 1,5-dimethyl-1-Vinyl-4-hexenyl ester /Linalyl anthranilate	C17H23NO2	273.173	273.376	1
esters/lactones	93-58-3	benzoic acid, methyl ester	benzoic acid, methyl ester	C8H8O2	136.052	136.15	1									1
esters/lactones	117-81-7	bis(2-Ethylhexyl)-phthalate / fleximel	bis(2-Ethylhexyl)-phthalate / fleximel	C24H38O4	390.277	390.564	1
esters/lactones	13851-11-1	Borneol Acetate (fenchyl acetate?)	Borneol Acetate (fenchyl acetate?)	C12H20O2	196.146	169.29	1
esters/lactones	109-21-7	butanoic acid, butyl ester / butyl butanoate / n-butyric acid, butyl ester	butanoic acid, butyl ester / butyl butanoate / n-butyric acid, butyl ester	C8H16O2	144.115	144.214	2																																										1
esters/lactones	105-54-4	butanoic acid, ethyl ester / ethyl butanoate / n-butyric acid, ethyl ester	butanoic acid, ethyl ester / ethyl butanoate / n-butyric acid, ethyl ester	C6H12O2	116.084	116.16	3																																					1					1
esters/lactones	539-90-2	butanoic acid, isobutyl ester / isobutyl butanoate	butanoic acid, isobutyl ester / isobutyl butanoate	C8H16O2	144.115	144.214	1
esters/lactones	623-42-7	butanoic acid, methyl ester / methyl butanoate	butanoic acid, methyl ester / methyl butanoate / methyl butyrate	C5H10O2	102.068	102.133	3																																										1
esters/lactones	819-97-6	butanoic acid, methylpropyl ester 1- / butyric acid, sec-butyl ester	butanoic acid, 1-methylpropyl ester / butyric acid, sec-butyl ester	C8H16O2	144.115	144.214	1
esters/lactones	105-66-8	butanoic acid, propyl ester / propyl butanoate	butanoic acid, propyl ester / propyl butanoate	C7H14O2	130.099	130.187	4									1																																	1
esters/lactones	624-48-6 (Z)	butenedioic acid 2-, dimethyl ester (E/Z: maleic/fumaric)	2-butenedioic acid dimethyl ester	C6H8O4	144.042	144.126	1										1
esters/lactones	123-86-4	Butyl Acetate n-	n-Butyl Acetate	C6H12O2	116.084	116.16	1
esters/lactones	136-60-7	Butyl benzoate	Butyl benzoate	C11H14O2	178.099	178.231	1
esters/lactones	111-06-8	Butyl hexadecanoate	Butyl hexadecanoate	C20H40O2	312.303	312.538	1
esters/lactones	110-36-1	Butyl Myristate n-	n-Butyl Myristate	C18H36O2	284.272	284.484	1
esters/lactones	123-95-5	butyl octadecanoate	butyl octadecanoate	C22H44O2	340.334	340.592	1										1
esters/lactones	591-34-4	Butyl sec- propionate	sec-Butyl propionate	C7H14O2	130.099	130.187	1
esters/lactones	104-50-7	Butyl-dihydrofuran-2(3H)-one 5- / g-octanoic lactone	5-Butyl-dihydrofuran-2(3H)-one / g-octanoic lactone	C8H14O2	142.099	142.198	2
esters/lactones	96-48-0	butyrolactone	g-butyrolactone / Dihydrofuran-2(3H)-one / 4-Hydroxybutanoic acid lactone	C4H6O2	86.0368	86.09	7																																1										1
esters/lactones	695-06-7	caprolactone g- / 5-Ethyldihydro-2(3H)-furanone	g-caprolactone / 5-Ethyldihydro-2(3H)-furanone	C6H10O2	114.068	114.144	1
esters/lactones	1654-86-0	Decyl decanoate	Decyl decanoate	C20H40O2	312.303	312.538	1
esters/lactones	84-74-2	dibutyl phthalate (plastisizer?) / ethylidenepropanedioic acid, diethyl ester	dibutyl phthalate (plastisizer?) / ethylidenepropanedioic acid, diethyl ester	C16H22O4	278.152	278.348	2										1																																1
esters/lactones	1462-12-0	diethyl ethylidenemalonate	diethyl ethylidenemalonate	C9H14O4	186.089	186.207	1
esters/lactones	84-66-2	diethyl phthalate / phthalic acid diethyl ester	diethyl phthalate / phthalic acid diethyl ester	C12H14O4	222.089	222.24	2																																										1
esters/lactones	104-61-0	Dihydro-5-pentylfuran-2(3H)-one / g-nonanoic lactone	Dihydro-5-pentylfuran-2(3H)-one / g-nonanoic lactone	C9H16O2	156.115	156.225	2
esters/lactones	105-21-5	Dihydro-5-propylfuran-2(3H)-one / 4-heptanolide	Dihydro-5-propylfuran-2(3H)-one / 4-heptanolide	C7H12O2	128.084	128.171	1												1
esters/lactones	131-20-4	Diisooctyl phthalate	Diisooctyl phthalate	C24H38O4	390.277	390.564	1
esters/lactones	617-52-7	dimethyl itaconate / methylenebutanedioic acid, dimethyl ester	dimethyl itaconate / methylenebutanedioic acid, dimethyl ester	C7H10O4	158.058	158.153	1
esters/lactones	na	dimethyl-3H-isobenzofuran-1-one 6,7-	6,7-dimethyl-3H-isobenzofuran-1-one	C10H10O2	162.068	162.188	1
esters/lactones	5145-01-7	Dimethyldihydro-2(3H)-furanone 3,5-	3,5-Dimethyldihydro-2(3H)-furanone	C6H10O2	114.068	114.144	3
esters/lactones	3720-22-7	Dimethyltetrahydro-2H-pyran-2-one 3,6-	3,6-Dimethyltetrahydro-2H-pyran-2-one	C7H12O2	128.084	128.171	1
esters/lactones	117-84-0	dioctyl phthalate	dioctyl phthalate	C24H38O4	390.277	390.564	1										1
esters/lactones	131-16-8	dipropyl phthalate (plastisizer?)	dipropyl phthalate (plastisizer?)	C14H18O4	250.12	250.294	1									1
esters/lactones	na	Docosadienyl (Z,Z)-13,16- butyrate	(Z,Z)-13,16-Docosadienyl butyrate	C26H48O2	392.365	392.668	3
esters/lactones	na	Docosenyl (Z)-13- butyrate	(Z)-13-Docosenyl butyrate	C26H50O2	394.381	394.684	3
esters/lactones	na	Docosenyl (Z)-15- butyrate	(Z)-15-Docosenyl butyrate	C26H50O2	394.381	394.684	3
esters/lactones	na	Docosenyl 15- formate	15-Docosenyl formate	C23H44O2	352.334	352.603	1																1
esters/lactones	55373-87-0	Docosyl butyrate	Docosyl butyrate	C26H52O2	396.397	396.7	3
esters/lactones	na	Docosyl formate	Docosyl formate	C23H46O2	354.35	354.619	2																1				1
esters/lactones	18679-18-0	Dodecen-4-olide (Z)-6-	(Z)-6-Dodecen-4-olide	C12H20O2	196.146	196.29	4														1	1																					1
esters/lactones	16974-12-2	Dodecenyl acetate (Z)-6-	(Z)-6-Dodecenyl acetate	C14H26O2	226.193	226.36	1																			1
esters/lactones	14959-86-5	Dodecenyl acetate (Z)-7-	(Z)-7-Dodecenyl acetate	C14H26O2	226.193	226.36	2	1	1
esters/lactones	na	Dodecenyl formate (Z)-6-	(Z)-6-Dodecenyl formate	C13H24O2	212.178	212.333	1																			1
esters/lactones	112-66-3	Dodecyl acetate	Dodecyl acetate	C14H28O2	228.209	228.376	1																			1
esters/lactones	na	Dodecyl formate	Dodecyl formate	C13H26O2	214.193	214.349	1																			1
esters/lactones	2040-64-4	Dodecyl tetradecanoate	Dodecyl tetradecanoate	C26H52O2	396.397	396.7	1
esters/lactones	730-46-1	Dodecyldihydro-2(3H)-furanone 5- / gamma-palmitolactone	5-Dodecyldihydro-2(3H)-furanone / g-palmitolactone	C16H30O2	254.225	254.414	1																				1
esters/lactones	na	Dodecyltetrahydro-2H-pyran-2-one 6-	6-Dodecyltetrahydro-2H-pyran-2-one	C17H32O2	268.24	268.441	2														1	1
esters/lactones	na	Eicosadienyl (Z,Z)-11,14- butyrate	(Z,Z)-11,14-Eicosadienyl butyrate	C24H44O2	364.334	364.614	3
esters/lactones	na	Eicosenyl (Z)-11- butyrate	(Z)-11-Eicosenyl butyrate	C24H46O2	366.35	366.63	3
esters/lactones	na	Eicosenyl (Z)-13- butyrate	(Z)-13-Eicosenyl butyrate	C24H46O2	366.35	366.63	3
esters/lactones	na	Eicosyl butyrate	Eicosyl butyrate	C24H48O2	368.365	368.646	3
esters/lactones	23676-09-7	ethoxybenzoic acid, ethyl ester 4-/ ethyl 4-ethoxybenzoate	4-ethoxybenzoic acid, ethyl ester / ethyl 4-ethoxybenzoate	C11H14O3	194.094	194.23	2
esters/lactones	103-36-6	Ethyl (E)-3-phenyl-2-propenoate / ethyl trans-cinnamate	Ethyl (E)-3-phenyl-2-propenoate / ethyl trans-cinnamate	C11H12O2	176.084	176.215	1
esters/lactones	7452-79-1	Ethyl 2-methylbutanoate	Ethyl 2-methylbutanoate	C7H14O2	130.099	130.187	1
esters/lactones	101-97-3	Ethyl 2-phenylacetate	Ethyl 2-phenylacetate	C10H12O2	164.084	164.204	1
esters/lactones	108-64-5	Ethyl 3-methylbutanoate / ethyl isovalerate	Ethyl 3-methylbutanoate / ethyl isovalerate	C7H14O2	130.099	130.187	3																	1
esters/lactones	93-89-0	Ethyl benzoate	Ethyl benzoate	C9H10O2	150.068	150.177	2																																					1
esters/lactones	123-29-5	Ethyl nonanoate	Ethyl nonanoate	C11H22O2	186.162	186.295	1																																								1
esters/lactones	539-82-2	Ethyl pentanoate	Ethyl pentanoate	C7H14O2	130.099	130.187	2																																					1
esters/lactones	118-60-5	Ethylhexyl Salicylate 2-	2-Ethylhexyl Salicylate	C15H22O3	250.157	250.338	1
esters/lactones	4128-17-0	farnesyl acetate (E,E)- / Trimethyl-2,6,10-dodecatrienyl acetate (E,E)-3,7,11-	(E,E)-farnesyl acetate / (E,E)-3,7,11-Trimethyl-2,6,10-dodecatrienyl acetate	C17H28O2	264.209	264.409	1
esters/lactones	78368-57-7	farnesyl decanoate (E,E)- / Trimethyl-2,6,10-dodecatrienyl (E,E)-3,7,11- decanoate	(E,E)-farnesyl decanoate / (E,E)-3,7,11-Trimethyl-2,6,10-dodecatrienyl decanoate	C25H44O2	376.334	376.625	2																																								1
esters/lactones	na	farnesyl decanoate (E,Z)- / Trimethyl-2,6,10-dodecatrienyl (E,Z)-3,7,11- decanoate	(E,Z)-farnesyl decanoate / (E,Z)-3,7,11-Trimethyl-2,6,10-dodecatrienyl decanoate	C25H44O2	376.334	376.625	1																																								1
esters/lactones	na	farnesyl decanoate (Z,E)-/ Trimethyl-2,6,10-dodecatrienyl (Z,E)-3,7,11- decanoate	(Z,E)-farnesyl decanoate / (Z,E)-3,7,11-Trimethyl-2,6,10-dodecatrienyl decanoate	C25H44O2	376.334	376.625	1																																								1
esters/lactones	na	farnesyl decanoate (Z,Z)-/ Trimethyl-2,6,10-dodecatrienyl (Z,Z)-3,7,11- decanoate	(Z,Z)-farnesyl decanoate / (Z,Z)-3,7,11-Trimethyl-2,6,10-dodecatrienyl decanoate	C25H44O2	376.334	376.625	1																																								1
esters/lactones	78368-58-8	farnesyl dodecanoate (E,E)- / (E,E)-3,7,11-Trimethyl-2,6,10-dodecatrienyl dodecanoate	(E,E)-farnesyl dodecanoate / (E,E)-3,7,11-Trimethyl-2,6,10-dodecatrienyl dodecanoate	C27H48O2	404.365	404.679	1
esters/lactones	na	farnesyl hexanoate (E,E)- / Trimethyl-2,6,10-dodecatrienyl (E,E)-3,7,11- hexanoate	(E,E)-farnesyl hexanoate / (E,E)-3,7,11-Trimethyl-2,6,10-dodecatrienyl hexanoate	C21H36O2	320.272	320.517	1
esters/lactones	na	farnesyl octanoate (E,E)- / Trimethyl-2,6,10-dodecatrienyl (E,E)-3,7,11- octanoate	(E,E)-farnesyl octanoate / (E,E)-3,7,11-Trimethyl-2,6,10-dodecatrienyl octanoate	C23H40O2	348.303	348.571	1
esters/lactones	102-76-1	glycerine triacetate (plastizizer?)	glycerine triacetate (plastizizer?)	C9H14O6	218.079	218.205	2			1																																							1
esters/lactones	na	Heneicosen-2-one (Z)-14-	(Z)-14-Heneicosen-2-one	C21H40O	308.308	308.55	1
esters/lactones	na	Heneicosenyl (Z)-12- formate	(Z)-12-Heneicosenyl formate	C22H42O2	338.318	338.576	1																				1
esters/lactones	na	Heneicosenyl 14- formate	14-Heneicosenyl formate	C22H42O2	338.318	338.576	1																1
esters/lactones	na	Heneicosenyl 16- formate	16-Heneicosenyl formate	C22H42O2	338.318	338.576	1																1
esters/lactones	77899-03-7	Heneicosyl formate	Heneicosyl formate	C22H44O2	340.334	340.592	2																1				1
esters/lactones	na	Heptadecadienyl (Z,Z)-8,11- acetate	(Z,Z)-8,11-Heptadecadienyl acetate	C19H34O2	294.256	294.479	1																			1
esters/lactones	na	Heptadecadienyl (Z,Z)-8,11- formate	(Z,Z)-8,11-Heptadecadienyl formate	C18H32O2	280.24	280.452	2																			1	1
esters/lactones	na	Heptadecenyl (Z)-8- formate	(Z)-8-Heptadecenyl formate	C18H34O2	282.256	282.468	1																				1
esters/lactones	na	Heptadecyl 4-methylheptanoate	Heptadecyl 4-methylheptanoate	C25H50O2	382.381	382.673	1																																									1
esters/lactones	42231-43-6	Heptadecyl octanoate	Heptadecyl octanoate	C25H50O2	382.381	382.673	1
esters/lactones	104-67-6	Heptyl-dihydrofuran-2(3H)-one 5- / g-undecalactone	5-Heptyl-dihydrofuran-2(3H)-one / g-undecalactone	C11H20O2	184.146	184.279	1
esters/lactones	713-95-1	Heptyl-tetrahydropyran-2-one 6- / d-dodecalactone	6-Heptyl-tetrahydropyran-2-one / d-dodecalactone	C12H22O2	198.162	198.306	4														1	1
esters/lactones	na	Hexadecadienyl (Z,Z)-7,10- acetate	(Z,Z)-7,10-Hexadecadienyl acetate	C18H32O2	280.24	280.452	1																			1
esters/lactones	na	Hexadecadienyl (Z,Z)-7,10- formate	(Z,Z)-7,10-Hexadecadienyl formate	C17H30O2	266.225	266.425	1																			1
esters/lactones	4459-57-8	Hexadecanolide 15-	15-Hexadecanolide	C16H30O2	254.225	254.414	1
esters/lactones	109-29-5	Hexadecanolide 16-	16-Hexadecanolide	C16H30O2	254.225	254.414	1
esters/lactones	123-69-3	Hexadecen-16-olide (Z)-7-	(Z)-7-Hexadecen-16-olide	C16H28O2	252.209	252.398	1
esters/lactones	56218-71-4	Hexadecenyl (Z)-10- acetate	(Z)-10-Hexadecenyl acetate	C18H34O2	282.256	282.468	1																			1
esters/lactones	na	Hexadecyl 4-methylpentanoate	Hexadecyl 4-methylpentanoate	C22H44O2	340.334	340.592	1																																									1
esters/lactones	na	Hexadecyl 6-methylheptanoate	Hexadecyl 6-methylheptanoate	C24H48O2	368.365	368.646	1																																									1
esters/lactones	na	Hexadecyl 8-methylnonanoate	Hexadecyl 8-methylnonanoate	C26H52O2	396.397	396.7	1																																									1
esters/lactones	629-70-9	Hexadecyl acetate	Hexadecyl acetate	C18H36O2	284.272	284.484	4																			1
esters/lactones	6221-99-4	Hexadecyl butyrate	Hexadecyl butyrate	C20H40O2	312.303	312.538	3
esters/lactones	29710-34-7	Hexadecyl decanoate	Hexadecyl decanoate	C26H52O2	396.397	396.7	3																																								1	1
esters/lactones	20834-06-4	Hexadecyl dodecanoate	Hexadecyl dodecanoate	C28H56O2	424.428	424.754	1																																									1
esters/lactones	540-10-3	Hexadecyl hexadecanoate	Hexadecyl hexadecanoate	C32H64O2	480.491	480.862	1
esters/lactones	14331-11-4	Hexadecyl hexanoate	Hexadecyl hexanoate	C22H44O2	340.334	340.592	1																																									1
esters/lactones	29710-31-4	Hexadecyl octanoate	Hexadecyl octanoate	C24H48O2	368.365	368.646	3																																									1
esters/lactones	2599-01-1	Hexadecyl tetradecanoate	Hexadecyl tetradecanoate	C30H60O2	452.459	452.808	1
esters/lactones	823-22-3	hexalactone d- / 6-Methyl-tetrahydro-2H-pyran-2-one	d-hexalactone / 6-Methyl-tetrahydro-2H-pyran-2-one	C6H10O2	114.068	114.144	1
esters/lactones	106-70-7	hexanoic acid, methyl ester / methyl hexanoate	hexanoic acid, methyl ester / methyl hexanoate	C7H14O2	130.099	130.187	3									1																																	1
esters/lactones	142-92-7	Hexyl acetate	Hexyl acetate	C8H16O2	144.115	144.214	2
esters/lactones	6259-76-3	Hexyl Salicylate n-	n-Hexyl Salicylate	C13H18O3	222.126	222.284	1
esters/lactones	706-14-9	Hexyl-dihydrofuran-2(3H)-one 5- / g-decalactone	5-Hexyl-dihydrofuran-2(3H)-one / g-decalactone	C10H18O2	170.131	170.252	4
esters/lactones	na	Hydroxy-(Z)-9-pentadecenyl 2- propanoate	2-Hydroxy-(Z)-9-pentadecenyl propanoate	C18H34O3	298.251	298.467	1								1
esters/lactones	77-68-9	Hydroxy-2,2,4-trimethyl pentyl 3- Ester of isobutanoic acid / Texanol	3-Hydroxy-2,2,4-trimethyl pentyl Ester of isobutanoic acid (Texanol)	C12H24O3	216.173	216.321	1
esters/lactones	na	Hydroxy-2-methylphenyl 4- 2-methylbutanoate	4-Hydroxy-2-methylphenyl 2-methylbutanoate	C12H16O3	208.11	208.257	1																																								1
esters/lactones	na	Hydroxy-2-methylphenyl 4- isobutyrate	4-Hydroxy-2-methylphenyl isobutyrate	C11H14O3	194.094	194.23	1																																								1
esters/lactones	na	Hydroxy-3-methylphenyl 4- 2-methylbutanoate	4-Hydroxy-3-methylphenyl 2-methylbutanoate	C12H16O3	208.11	208.257	1																																								1
esters/lactones	na	Hydroxy-3-methylphenyl 4- isobutyrate	4-Hydroxy-3-methylphenyl isobutyrate	C11H14O3	194.094	194.23	1																																								1
esters/lactones	na	Hydroxyeicosyl 2- acetate	2-Hydroxyeicosyl acetate	C22H44O3	356.329	356.591	2																				1
esters/lactones	na	Hydroxyeicosyl 2- butyrate	2-Hydroxyeicosyl butyrate	C24H48O3	384.36	384.645	2														1	1
esters/lactones	na	Hydroxyeicosyl 2- pentanoate	2-Hydroxyeicosyl pentanoate	C25H50O3	398.376	398.672	2														1	1
esters/lactones	na	Hydroxyheptadec-2-yl 1- pentanoate	1-Hydroxyheptadec-2-yl pentanoate	C22H44O3	356.329	356.591	1
esters/lactones	na	Hydroxyheptadecyl 2- pentanoate	2-Hydroxyheptadecyl pentanoate	C22H44O3	356.329	356.591	1
esters/lactones	na	Hydroxyhexadec-2-yl 1- pentanoate	1-Hydroxyhexadec-2-yl pentanoate	C21H42O3	342.313	342.564	1
esters/lactones	77899-01-5	Hydroxyhexadecyl 2- butyrate	2-Hydroxyhexadecyl butyrate	C20H40O3	328.298	328.537	1								1
esters/lactones	na	Hydroxyhexadecyl 2- pentanoate	2-Hydroxyhexadecyl pentanoate	C21H42O3	342.313	342.564	1
esters/lactones	na	Hydroxynonadecyl 2- butyrate	2-Hydroxynonadecyl butyrate	C23H46O3	370.345	370.618	2														1	1
esters/lactones	na	Hydroxyoctadecyl 2- acetate	2-Hydroxyoctadecyl acetate	C20H40O3	328.298	328.537	3														1	1
esters/lactones	na	Hydroxyoctadecyl 2- butyrate	2-Hydroxyoctadecyl butyrate	C22H44O3	356.329	356.591	2														1	1
esters/lactones	na	Hydroxyoctadecyl 2- isobutyrate	2-Hydroxyoctadecyl isobutyrate	C22H44O3	356.329	356.591	2														1	1
esters/lactones	na	Hydroxyoctadecyl 2- pentanoate	2-Hydroxyoctadecyl pentanoate	C23H46O3	370.345	370.618	2														1	1
esters/lactones	77898-99-8	Hydroxypentadecyl 2- propionate	2-Hydroxypentadecyl propionate	C18H36O3	300.266	300.483	1								1
esters/lactones	na	Icosenyl 13- formate	13-Icosenyl formate	C21H40O2	324.303	324.549	1																1
esters/lactones	66326-15-6	Icosyl formate	Icosyl formate	C21H42O2	326.318	326.565	2																1				1
esters/lactones	142-91-6	Isopropyl Palmitate	Isopropyl Palmitate	C19H38O2	298.287	298.511	1
esters/lactones	4821-04-9	Menth-1-en-4-ol p-, acetate / Terpinenyl acetate	p-Menth-1-en-4-ol acetate / Terpinenyl acetate	C12H20O2	196.146	196.29	1
esters/lactones	1937-62-8	Methyl (E)-9-octadecenoate	Methyl (E)-9-octadecenoate	C19H36O2	296.272	296.495	1
esters/lactones	5129-66-8	Methyl 12-methyltetradecanoate	Methyl 12-methyltetradecanoate	C16H32O2	256.24	256.43	1
esters/lactones	5129-60-2	Methyl 14-methylpentadecanoate	Methyl 14-methylpentadecanoate	C17H34O2	270.256	270.457	1
esters/lactones	na	Methyl 2,4,6,10-tetramethylundecanoate	Methyl 2,4,6,10-tetramethylundecanoate	C16H32O2	256.24	256.43	1
esters/lactones	547-63-7	Methyl 2-methylpropionate / methyl isobutyrate	Methyl 2-methylpropionate / methyl isobutyrate	C5H10O2	102.068	102.133	1
esters/lactones	556-24-1	Methyl 3-methylbutanoate	Methyl 3-methylbutanoate	C6H12O2	116.084	116.16	1
esters/lactones	na	Methyl 4,11-dimethyldodecanoate	Methyl 4,11-dimethyldodecanoate	C15H30O2	242.225	242.403	1
esters/lactones	na	Methyl 4,13-dimethyltetradecanoate	Methyl 4,13-dimethyltetradecanoate	C17H34O2	270.256	270.457	1
esters/lactones	na	Methyl 4,15-dimethylhexadecanoate	Methyl 4,15-dimethylhexadecanoate	C19H38O2	298.287	298.511	1
esters/lactones	na	Methyl 4,7-dimethyloctanoate	Methyl 4,7-dimethyloctanoate	C11H22O2	186.162	186.295	1
esters/lactones	na	Methyl 4,8,10-trimethyldodecanoate	Methyl 4,8,10-trimethyldodecanoate	C16H32O2	256.24	256.43	1
esters/lactones	na	Methyl 4,9,11-trimethyltridecanoate	Methyl 4,9,11-trimethyltridecanoate	C17H34O2	270.256	270.457	1
esters/lactones	na	Methyl 4,9-dimethyldecanoate	Methyl 4,9-dimethyldecanoate	C13H26O2	214.193	214.349	1
esters/lactones	na	Methyl 4,9-dimethyltetradecanoate	Methyl 4,9-dimethyltetradecanoate	C17H34O2	270.256	270.457	1
esters/lactones	99-76-3	Methyl 4-hydroxybenzoate	Methyl 4-hydroxybenzoate	C8H8O3	152.047	152.149	1
esters/lactones	na	Methyl 4-methylheptadecanoate	Methyl 4-methylheptadecanoate	C19H38O2	298.287	298.511	1
esters/lactones	na	Methyl 4-methylnonanoate	Methyl 4-methylnonanoate	C11H22O2	186.162	186.295	1
esters/lactones	na	Methyl 4-methylpentadecanoate	Methyl 4-methylpentadecanoate	C17H34O2	270.256	270.457	1
esters/lactones	na	Methyl 4-methyltridecanoate	Methyl 4-methyltridecanoate	C15H30O2	242.225	242.403	1
esters/lactones	na	Methyl 4-methylundecanoate	Methyl 4-methylundecanoate	C13H26O2	214.193	214.349	1
esters/lactones	79-20-9	methyl acetate / acetic acid methyl ester	methyl acetate / acetic acid methyl ester	C3H6O2	74.0368	74.079	4									1		1																															1
esters/lactones	106-73-0	Methyl heptanoate	Methyl heptanoate	C8H16O2	144.115	144.214	1
esters/lactones	112-39-0	Methyl hexadecanoate / methyl palmitate	Methyl hexadecanoate / methyl palmitate	C17H34O2	270.256	270.457	1
esters/lactones	112-61-8	Methyl octadecanoate / methyl stearate	Methyl octadecanoate / methyl stearate	C19H38O2	298.287	298.511	2
esters/lactones	1191-16-8	Methyl-2-butenyl 3- acetate	3-Methyl-2-butenyl acetate	C7H12O2	128.084	128.171	1												1
esters/lactones	51115-64-1	Methylbutyl 2- butyrate	2-Methylbutyl butyrate	C9H18O2	158.131	158.241	1
esters/lactones	2050-01-3	Methylbutyl 3- 2-methylpropionate / isopentyl isobutyrate	3-Methylbutyl 2-methylpropionate / isopentyl isobutyrate	C9H18O2	158.131	158.241	1
esters/lactones	123-92-2	Methylbutyl 3- acetate / isopentyl acetate	3-Methylbutyl acetate / isopentyl acetate	C7H14O2	130.099	130.187	1
esters/lactones	105-68-0	Methylbutyl 3- propionate / isopentyl propionate	3-Methylbutyl propionate / isopentyl propionate	C8H16O2	144.115	144.214	1
esters/lactones	2445-77-4	Methylbutyl 3-methylbutanoate 2-	2-Methylbutyl 3-methylbutanoate	C10H20O2	172.146	172.268	1
esters/lactones	34003-72-0	Methyldihydrofuran-2(3H)-one 5- / 5-methyldihydrofuranone	5-Methyldihydrofuran-2(3H)-one / 5-methyldihydrofuranone	C5H8O2	100.052	100.117	1												1
esters/lactones	na	Methyloxacyclododec-6-en-2-one 12-	12-Methyloxacyclododec-6-en-2-one	C12H20O2	196.146	196.29	1
esters/lactones	110-19-0	Methylpropyl 2- acetate / isobutyl acetate	2-Methylpropyl acetate / isobutyl acetate	C6H12O2	116.084	116.16	1																	1
esters/lactones	540-42-1	Methylpropyl 2- propionate / isobutyl propionate	2-Methylpropyl propionate / isobutyl propionate	C7H14O2	130.099	130.187	1																	1
esters/lactones	na	Methyltetradecyl 12- 2-methylbutyrate	12-Methyltetradecyl 2-methylbutyrate	C20H40O2	312.303	312.538	1																													1
esters/lactones	na	Methyltetradecyl 12- 3-methylbutyrate	12-Methyltetradecyl 3-methylbutyrate	C20H40O2	312.303	312.538	1																													1
esters/lactones	na	Methyltetradecyl 13- 2-methylbutyrate	13-Methyltetradecyl 2-methylbutyrate	C20H40O2	312.303	312.538	1																													1
esters/lactones	na	Methyltetradecyl 13- 3-methylbutyrate	13-Methyltetradecyl 3-methylbutyrate	C20H40O2	312.303	312.538	1																													1
esters/lactones	na	Nonadecenyl (Z)-10- formate	(Z)-10-Nonadecenyl formate	C20H38O2	310.287	310.522	1																				1
esters/lactones	na	Nonadecenyl 12- formate	12-Nonadecenyl formate	C20H38O2	310.287	310.522	1																1
esters/lactones	66455-49-0	Nonadecyl formate	Nonadecyl formate	C20H40O2	312.303	312.538	2																1				1
esters/lactones	2721-22-4	Nonyltetrahydro-2H-pyran-2-one 6- / delta-nonyl-delta-valeralactone	6-Nonyltetrahydro-2H-pyran-2-one / delta-nonyl-delta-valeralactone	C14H26O2	226.193	226.36	1
esters/lactones	na	Octadecadienyl (Z,Z)-9,12- acetate	(Z,Z)-9,12-Octadecadienyl acetate	C20H36O2	308.272	308.506	1																			1
esters/lactones	na	Octadecenyl (Z)-11- butyrate	(Z)-11-Octadecenyl butyrate	C22H42O2	338.318	338.576	3
esters/lactones	na	Octadecenyl (Z)-9- butyrate	(Z)-9-Octadecenyl butyrate	C22H42O2	338.318	338.576	3
esters/lactones	13373-83-6	Octadecyl butyrate	Octadecyl butyrate	C22H44O2	340.334	340.592	3
esters/lactones	112-14-1	Octyl acetate	Octyl acetate	C10H20O2	172.146	172.268	1
esters/lactones	2305-05-7	Octyl-dihydrofuran-2(3H)-one 5- / g-dodecalactone	5-Octyl-dihydrofuran-2(3H)-one / g-dodecalactone	C12H22O2	198.162	198.306	3																														1
esters/lactones	599-04-2	pantolactone	pantolactone	C6H10O3	130.063	130.143	1
esters/lactones	na	Pentacosadien-4-olide	Pentacosadien-4-olide	C25H44O2	376.334	376.625	1
esters/lactones	na	Pentacosenyl (Z)-16- formate	(Z)-16-Pentacosenyl formate	C26H50O2	394.381	394.684	1																				1
esters/lactones	na	Pentacosenyl 18- formate	18-Pentacosenyl formate	C26H50O2	394.381	394.684	1																1
esters/lactones	na	Pentacosyl formate	Pentacosyl formate	C26H52O2	396.397	396.7	1																				1
esters/lactones	na	Pentadecadienyl (Z,Z)-6,9- acetate	(Z,Z)-6,9-Pentadecadienyl acetate	C17H30O2	266.225	266.425	1																			1
esters/lactones	na	Pentadecadienyl formate (Z,Z)-6,9-	(Z,Z)-6,9-Pentadecadienyl formate	C16H28O2	252.209	252.398	2																			1	1
esters/lactones	64437-41-8	Pentadecenyl (Z)-9- acetate	(Z)-9-Pentadecenyl acetate	C17H32O2	268.24	268.441	1																			1
esters/lactones	na	Pentadecenyl formate (Z)-6-	(Z)-6-Pentadecenyl formate	C16H30O2	254.225	254.414	1																				1
esters/lactones	na	Pentadecenyl formate 8-	8-Pentadecenyl formate	C16H30O2	254.225	254.414	1																1
esters/lactones	na	Pentadecyl 4-methylheptanoate	Pentadecyl 4-methylheptanoate	C23H46O2	354.35	354.619	1																																									1
esters/lactones	629-58-3	Pentadecyl acetate	Pentadecyl acetate	C17H34O2	270.256	270.457	1																			1
esters/lactones	na	Pentadecyl formate	Pentadecyl formate	C16H32O2	256.24	256.43	2																			1	1
esters/lactones	42231-42-5	Pentadecyl octanoate	Pentadecyl octanoate	C23H46O2	354.35	354.619	2																																									1
esters/lactones	108-29-2	pentalactone 4- / γ-valerolactone	4-pentalactone / γ-valerolactone	C5H8O2	100.052	100.117	3			1						1																																	1
esters/lactones	540-18-1	Pentyl butyrate	Pentyl butyrate	C9H18O2	158.131	158.241	2							1																														1
esters/lactones	2173-56-0	Pentyl pentanoate / amyl valerate	Pentyl pentanoate / amyl valerate	C10H20O2	172.146	172.268	1																																					1
esters/lactones	698-76-0	pentyloxan-2-one 6- / δ-octalactone	6-pentyloxan-2-one / 6-Propyl-tetrahydropyran-2-one / δ-octalactone	C8H14O2	142.099	142.198	2																									1
esters/lactones	103-45-7	Phenylethyl acetate 2-	2-Phenylethyl acetate	C10H12O2	164.084	164.204	1
esters/lactones	103-52-6	Phenylethyl butyrate 2-	2-Phenylethyl butyrate	C12H16O2	192.115	192.258	1
esters/lactones	628-66-0	Propanediol diacetate 1,3-	1,3-Propanediol diacetate	C7H12O4	160.074	160.169	1
esters/lactones	590-01-2	propanoic acid, butyl ester / butyl propanoate	propanoic acid, butyl ester / butyl propanoate	C7H14O2	130.099	130.187	2									1																																	1
esters/lactones	105-37-3	propanoic acid, ethyl ester / ethyl propanoate	propanoic acid, ethyl ester / ethyl propanoate	C5H10O2	102.068	102.133	3																	1																									1
esters/lactones	554-12-1	propanoic acid, methyl ester / methyl propanoate	propanoic acid, methyl ester / methyl propanoate	C4H8O2	88.0524	88.106	2																																										1
esters/lactones	106-36-5	propanoic acid, propyl ester / propyl propaonoate	propanoic acid, propyl ester / propyl propaonoate	C6H12O2	116.084	116.16	2																																										1
esters/lactones	84713-06-4	Propylpentyl 1- laurate	1-Propylpentyl laurate	C20H40O2	312.303	312.538	1
esters/lactones	774-65-2	t-Butyl Benzoate	t-Butyl Benzoate	C11H14O2	178.099	178.231	1
esters/lactones	10198-23-9	terpinyl acetate b-	β-terpinyl acetate	C12H20O2	196.146	196.29	1
esters/lactones	80-27-3	Terpinyl Propionate α-	α-Terpinyl Propionate	C13H22O2	210.162	210.317	1
esters/lactones	32210-23-4	tert-Butyl Cyclohexyl p- Acetate	p-tert-Butyl Cyclohexyl Acetate	C12H22O2	198.162	198.306	1
esters/lactones	na	Tetracosadien-4-olide	Tetracosadien-4-olide	C24H42O2	362.318	362.598	1
esters/lactones	na	Tetracosadienyl (Z,Z)-15,18- butyrate	(Z,Z)-15,18-Tetracosadienyl butyrate	C28H52O2	420.397	420.722	3
esters/lactones	na	Tetracosenyl (Z)-15- butyrate	(Z)-15-Tetracosenyl butyrate	C28H54O2	422.412	422.738	3
esters/lactones	na	Tetracosenyl (Z)-17- butyrate	(Z)-17-Tetracosenyl butyrate	C28H54O2	422.412	422.738	3
esters/lactones	na	Tetracosyl formate	Tetracosyl formate	C25H50O2	382.381	382.673	1																				1
esters/lactones	na	Tetradecadienyl acetate (Z,Z)-5,8-	(Z,Z)-5,8-Tetradecadienyl acetate	C16H28O2	252.209	252.398	1																			1
esters/lactones	na	Tetradecadienyl formate (Z,Z)-5,8-	(Z,Z)-5,8-Tetradecadienyl formate	C15H26O2	238.193	238.371	1																			1
esters/lactones	35835-80-4	Tetradecenyl acetate (Z)-8-	(Z)-8-Tetradecenyl acetate	C16H30O2	254.225	254.414	1																			1
esters/lactones	na	Tetradecenyl formate (Z)-8-	(Z)-8-Tetradecenyl formate	C15H28O2	240.209	240.387	1																			1
esters/lactones	638-59-5	Tetradecyl acetate	Tetradecyl acetate	C16H32O2	256.24	256.43	2																			1
esters/lactones	5451-63-8	Tetradecyl formate	Tetradecyl formate	C15H30O2	242.225	242.403	2																1			1
esters/lactones	71801-23-5	Tetradecyl hexanoate	Tetradecyl hexanoate	C20H40O2	312.303	312.538	1																																									1
esters/lactones	16456-36-3	Tetradecyl octanoate	Tetradecyl octanoate	C22H44O2	340.334	340.592	3																																									1
esters/lactones	3234-85-3	Tetradecyl tetradecanoate	Tetradecyl tetradecanoate	C28H56O2	424.428	424.754	1
esters/lactones	705-86-2	Tetrahydro-6-pentylpyran-2-one / d-decalactone	Tetrahydro-6-pentylpyran-2-one / d-decalactone	C10H18O2	170.131	170.252	3
esters/lactones	60998-59-6	tetramethylphthalide 4,5,6,7- / 4,5,6,7-tetramethyl-2(3H)-benzofuranone	4,5,6,7-tetramethylphthalide / 4,5,6,7-tetramethyl-2(3H)-benzofuranone	C12H14O2	190.099	190.242	2																																										1
esters/lactones	na	Tricosenyl (Z)-14- formate	(Z)-14-Tricosenyl formate	C24H46O2	366.35	366.63	1																				1
esters/lactones	na	Tricosenyl 16- formate	16-Tricosenyl formate	C24H46O2	366.35	366.63	1																1
esters/lactones	na	Tricosenyl 18- formate	18-Tricosenyl formate	C24H46O2	366.35	366.63	1																1
esters/lactones	na	Tricosyl formate	Tricosyl formate	C24H48O2	368.365	368.646	2																1				1
esters/lactones	na	Tridecadienyl acetate (Z,Z)-4,7-	(Z,Z)-4,7-Tridecadienyl acetate	C15H26O2	238.193	238.371	1																			1
esters/lactones	na	Tridecadienyl formate (Z,Z)-4,7-	(Z,Z)-4,7-Tridecadienyl formate	C14H24O2	224.178	224.344	1																			1
esters/lactones	na	Tridecenyl acetate (Z)-7-	(Z)-7-Tridecenyl acetate	C15H28O2	240.209	240.387	1																			1
esters/lactones	na	Tridecenyl formate (Z)-7-	(Z)-7-Tridecenyl formate	C14H26O2	226.193	226.36	1																			1
esters/lactones	1072-33-9	Tridecyl acetate	Tridecyl acetate	C15H30O2	242.225	242.403	1																			1
esters/lactones	42875-41-2	Tridecyl formate	Tridecyl formate	C14H28O2	228.209	228.376	3																1			1	1
esters/lactones	42231-41-4	Tridecyl octanoate	Tridecyl octanoate	C21H42O2	326.318	326.565	1
esters/lactones	na	Tridecyltetrahydro-2H-pyran-2-one 6-	6-Tridecyltetrahydro-2H-pyran-2-one	C18H34O2	282.256	282.468	2														1	1
esters/lactones	118-56-9	Trimethyl Cyclohexyl Salicylate	Trimethyl Cyclohexyl Salicylate	C16H22O3	262.157	262.349	1
esters/lactones	6846-50-0	Trimethyl-1,3-Pentanediol Diisobutyrate 2,2,4- / Eastman plasticizer	2,2,4-Trimethyl-1,3-Pentanediol Diisobutyrate / Eastman plasticizer	C16H30O4	286.214	286.412	1
esters/lactones	74381-40-1	trimethylpentane-1,3-diyl bis(2-methylpropanoate) 2,4,4- / methylpropanoic acid 2-,1-(1,1-dimethylethyl)-2-methyl-1,3-propanediyl ester / 1-[2-(Isobutyryloxy)-1-methyethyl]-2,2-dimethylpropyl 2-Methylproponate	2,4,4-trimethylpentane-1,3-diyl bis(2-methylpropanoate) / 2-methylpropanoic acid, 1-(1,1-dimethylethyl)-2-methyl-1,3-propanediyl ester	C16H30O4	286.214	286.412	3																																										1
esters/lactones	5454-24-0	Undecyl formate	Undecyl formate	C12H24O2	200.178	200.3220	1																			1
esters/lactones	542-28-9	valerolactone d- / tetrahydro-2H-pyran-2-one	d-valerolactone / tetrahydro-2H-pyran-2-one	C5H8O2	100.052	100.117	1
ethers/furans	111-90-0	(2-Ethoxyethoxy)-ethanol 2-	2-(2-Ethoxyethoxy)-ethanol	C6H14O3	134.094	134.175	1
ethers/furans	106-62-7	(2-Hydroxypropoxy)-1-Propanol 2-	2-(2-Hydroxypropoxy)-1-Propanol	C6H14O3	134.094	134.175	1
ethers/furans	13429-07-7	(2-Methoxypropoxy)-2-Propanol 1-	1-(2-Methoxypropoxy)-2-Propanol	C7H16O3	148.11	148.202	1
ethers/furans	5131-66-8	Butoxy-2-propanol 1-	1-Butoxy-2-propanol	C7H16O2	132.115	132.203	1
ethers/furans	111-76-2	butoxyethanol 2- / butyl glycol; ethylene glycol butyl ether	2-butoxyethanol / butyl glycol; ethylene glycol butyl ether	C6H14O2	118.099	118.176	4									1																																	1
ethers/furans	112-34-5	Butoxyethoxy ethanol	Butoxyethoxy ethanol	C8H18O3	162.126	162.229	1
ethers/furans	628-81-9	Butyl ethyl ether	Butyl ethyl ether	C6H14O	102.105	102.177	1
ethers/furans	3073-92-5	Butyl propyl ether	Butyl propyl ether	C7H16O	116.12	116.204	1
ethers/furans	1004-29-1	butyltetrahydrofuran 2-	2-butyltetrahydrofuran	C8H16O	128.12	128.215	1									1
ethers/furans	629-14-1	Diethoxyethane 1,2-	1,2-Diethoxyethane	C6H14O2	118.099	118.176	1
ethers/furans	111-46-6	Diethylene glycol	Diethylene glycol / Bis(2-hydroxyethyl) ether	C4H10O3	106.063	106.121	1									1
ethers/furans	110-87-2	dihydro-2H-pyran 3,4-	3,4-dihydro-2H-pyran	C5H8O	84.0575	84.0575	2									1																																	1
ethers/furans	1191-99-7	dihydrofuran 2,3-	2,3-dihydrofuran	C4H6O	70.0419	70.091	2									1																																	1
ethers/furans	na	dimethoxy-9-(2-phenylethynyl)-fluoren-9-ol 3,6-	3,6-Dimethoxy-9-(2-phenylethynyl)-fluoren-9-ol	C23H18O3	342.126	342.394	1			1
ethers/furans	3710-43-8	dimethylfuran 2,4-	2,4-dimethylfuran	C6H8O4	96.0575	96.129	2									1																																	1
ethers/furans	111-43-3	Dipropyl ether	Dipropyl ether	C6H14O	102.105	102.177	1
ethers/furans	140-67-0	Estragole	Estragole	C10H12O	148.089	148.205	1
ethers/furans	17952-11-3	Ethyl pentyl ether	Ethyl pentyl ether	C7H16O	116.12	116.204	1
ethers/furans	628-32-0	Ethyl propyl ether	Ethyl propyl ether	C5H12O	88.0888	88.15	1
ethers/furans	3208-16-0	ethylfuran 2-	2-ethylfuran	C6H8O	96.0575	96.129	3											1																															1
ethers/furans	110-00-9	furan	furan	C4H4O	68.1262	68.075	2											1																															1
ethers/furans	98-00-0	furanmethanol 2- / furfuryl alcohol	2-furanmethanol / furfuryl alcohol	C5H6O2	98.0368	98.101	6									1																																	1
ethers/furans	13837-75-7	limonene oxide cis-	cis-limonene oxide	C10H16O	152.12	152.237	4											1															1																1
ethers/furans	4959-35-7	limonene oxide trans-	trans-limonene oxide	C10H16O	152.12	152.237	2																																										1
ethers/furans	5989-33-3	linalool oxide cis- / cis-2-(Tetrahydro-5-methyl-5-vinylfuran-2-yl)-propan-2-ol	cis-linalool oxide / cis-2-(Tetrahydro-5-methyl-5-vinylfuran-2-yl)-propan-2-ol	C10H18O2	170.131	170.252	2						1
ethers/furans	23007-29-6	linalool oxide trans- / trans-2-(Tetrahydro-5-methyl-5-vinylfuran-2-yl)-propan-2-ol	trans-linalool oxide / trans-2-(Tetrahydro-5-methyl-5-vinylfuran-2-yl)-propan-2-ol	C10H18O2	170.131	170.252	2						1
ethers/furans	931-57-7	Methoxy Cyclohexene 1-	1-Methoxy Cyclohexene	C7H12O	112.089	112.092	1
ethers/furans	4013-34-7	methoxyethyl)benzene (1-	(1-methoxyethyl)benzene	C9H12O	136.089	136.194	2			1																																							1
ethers/furans	na	Methyl-1-(vinyloxy)-butane 3-	3-Methyl-1-(vinyloxy)-butane	C7H14O	114.105	114.188	1
ethers/furans	1192-22-9	Methyl-2,3-epoxypentane 2-	2-Methyl-2,3-epoxypentane	C6H12O	100.089	100.161	1						1
ethers/furans	534-22-5	methylfuran 2-	2-methylfuran	C5H6O	82.0419	82.102	4									1		1																															1
ethers/furans	930-27-8	methylfuran 3-	3-methylfuran	C5H6O	82.0419	82.102	2											1																															1
ethers/furans	112-25-4	n-Hexyl Cellosolve	n-Hexyl Cellosolve	C8H18O2	146.131	146.23	1
ethers/furans	556-52-5	oxiranemethanol / glycidol	oxiranemethanol / glycidol	C3H6O2	74.0368	74.079	1									1
ethers/furans	108-61-2	Oxybis-1-propanol 2,2'-	2,2'-Oxybis-1-propanol	C6H14O3	134.094	134.175	1
ethers/furans	3777-69-3	pentylfuran 2-	2-pentylfuran	C9H14O	138.105	138.21	6											1
ethers/furans	122-99-6	phenoxyethanol 2-	2-phenoxyethanol	C8H10O2	138.068	138.166	4			1																																							1
ethers/furans	109-99-9	tetrahydrofuran	tetrahydrofuran	C4H8O	72.0585	72.107	2									1																																	1
ethers/furans	5076-20-0	Tetramethyloxirane 2,2,3,3-	2,2,3,3-Tetramethyloxirane	C6H12O	100.089	100.161	2
ethers/furans	470-82-6	Trimethyl-2-oxabicyclo[2.2.2.]octane 1,3,3- / eucalyptol	1,3,3-Trimethyl-2-oxabicyclo[2.2.2.]octane / eucalyptol	C10H18O	154.136	154.253	1
halogenated	56-23-5	carbon tetrachloride	carbon tetrachloride	CCl4	151.875	153.811	2									1																																	1
halogenated	78-89-7	chloro-1-propanol 2-	2-chloro-1-propanol	C3H7ClO	94.0185	94.538	2									1																																	1
halogenated	594-36-5	chloro-2-methylbutane 2- / tert-amyl chloride	2-chloro-2-methylbutane / tert-amyl chloride	C5H11Cl	106.055	106.593	2									1																																	1
halogenated	939-52-6	Chlorobutyrophenone 4-	4-Chlorobutyrophenone	C10H11ClO	182.05	182.647	1
halogenated	1002-69-3	Chlorodecane 1-	1-Chlorodecane	C10H21Cl	176.133	176.728	1
halogenated	75-00-3	chloroethane	chloroethane	C2H5Cl	64.008	64.512	2																																										1
halogenated	111-85-3	Chlorooctane 1-	1-Chlorooctane	C8H17Cl	148.102	148.674	1										1
halogenated	55334-43-5	dibromo-2-methylundecane 1,2-	1,2-dibromo-2-methylundecane	C12H24Br2	326.024	328.132	1			1
halogenated	5685-42-7	Dichloro-2-hexylcyclopropane 1,1-	1,1-Dichloro-2-hexylcyclopropane	C9H16Cl2	194.063	195.127	1
halogenated	96-23-1	Dichloro-2-propanol 1,3-	1,3-Dichloro-2-propanol	C3H6Cl2O	127.98	128.98	1
halogenated	541-73-1	Dichlorobenzene 1,3-	1,3-Dichlorobenzene	C6H4Cl2	145.969	146.998	1
halogenated	106-46-7	dichlorobenzene 1,4- / p-dichlorobenzene	1,4-dichlorobenzene / p-dichlorobenzene	C6H4Cl2	145.969	146.998	2																																										1
halogenated	540-59-0	dichloroethylene	dichloroethylene	C2H2Cl2	95.9534	96.938	2									1																																	1
halogenated	75-09-2	dichloromethane / methylene chloride	dichloromethane / methylene chloride	CH2Cl2	83.9534	84.927	6																																										1
halogenated	372-46-3	Fluorocyclohexane	Fluorocyclohexane	C6H11F	102.085	102.152	1
halogenated	73105-67-6	Iodo-2-methylundecane 1-	1-Iodo-2-methylundecane	C12H25I	296.1	296.236	1
halogenated	2050-77-3	iododecane 1-	1-iododecane	C10H21I	268.069	268.183	1									1
halogenated	4292-19-7	iodododecane 1-	1-iodododecane	C12H25I	296.1	296.236	1										1
halogenated	75-03-6	iodoethane	iodoethane	C2H5I	155.944	155.966	1									1
halogenated	74-88-4	iodomethane	iodomethane	CH3I	141.928	141.94	2									1																																	1
halogenated	629-27-6	Iodooctane 1-	1-Iodooctane	C8H17I	240.037	240.129	1							1
halogenated	4282-44-4	iodoundecane 1-	1-iodoundecane	C11H23I	282.084	282.209	2									1	1
halogenated	31508-00-6	Pentachloro-1,1-biphenyl 2,3',4,4',5-	2,3',4,4',5-Pentachloro-1,1-biphenyl	C12H5Cl5	323.883	326.422	1
halogenated	74472-38-1	Pentachloro-1,1-biphenyl 2,3,4,4',6-	2,3,4,4',6-Pentachloro-1,1-biphenyl	C12H5Cl5	323.883	326.422	1
halogenated	78-87-5	Propane, 1,2-dichloro-	Propane, 1,2-dichloro-	C3H6Cl2	111.985	112.981	1
halogenated	127-18-4	tetrachloroethylene / perchlorethylene	tetrachloroethylene / perchlorethylene	C2Cl4	163.875	165.822	2																																										1
halogenated	76-13-1	trichloro-1,2,2-trifluoroethane 1,1,2- / Freon 113	1,1,2-trichloro-1,2,2-trifluoroethane / Freon 113	C2Cl3F3	185.902	187.367	2									1																																	1
halogenated	71-55-6	trichloroethane	trichloroethane	C2H3Cl3	131.93	133.396	2									1																																	1
halogenated	79-01-6	trichloroethylene	trichloroethylene	C2HCl3	129.914	131.38	4									1																			1														1
halogenated	67-66-3	trichloromethane / chloroform	trichloromethane / chloroform	CHCl3	117.914	119.369	8									1																																	1
halogenated	75-69-4	trichloromonofluoromethane	trichloromonofluoromethane	CCl3F	135.905	137.359	2									1																																	1
hydrocarbons	1007-26-7	(2,2-Dimethylpropyl)-benzene / neopentylbenzene	(2,2-Dimethylpropyl)-benzene / neopentylbenzene	C11H16	148.125	148.249	1												1
hydrocarbons	83-32-9	acenaphthene	acenaphthene	C12H10	154.078	154.212	1									1
hydrocarbons	71-43-2	benzene	benzene	C6H6	78.047	78.114	5									1		1																	1														1
hydrocarbons	5208-59-3	bourbonene β-	β-bourbonene	C15H24	204.188	204.357	4			1						1																	1																1
hydrocarbons	106-99-0	butadiene 1,3-	1,3-butadiene	C4H6	54.047	54.092	2									1																																	1
hydrocarbons	106-97-8	butane	butane	C4H10	58.0783	58.124	6									1		1																															1
hydrocarbons	107-01-7	butene 2-	2-butene	C4H8	56.0626	56.108	2									1																																	1
hydrocarbons	41977-34-8	Butyl-1-methyl-2-propylcyclopropane 1-	1-Butyl-1-methyl-2-propylcyclopropane	C11H22	154.172	154.297	1
hydrocarbons	4537-15-9	butylheptyl)benzene (1- / 5-phenylundecane	(1-butylheptyl)benzene / 5-phenylundecane	C17H28	232.219	232.411	3			1																																							1
hydrocarbons	4534-50-3	butylnonyl)benzene (1- / 5-phenyltridecane	(1-butylnonyl)benzene / 5-phenyltridecane	C19H32	260.25	260.465	2			1
hydrocarbons	2719-63-3	butyloctyl)benzene (1- / 5-phenyldodecane	(1-butyloctyl)benzene / 5-phenyldodecane	C18H30	246.235	246.438	3			1																																							1
hydrocarbons	39029-41-9	cadinene γ-	γ-cadinene	C15H26	206.203	206.373	3									1																	1																1
hydrocarbons	483-76-1	cadinene δ-	δ-cadinene	C15H26	206.203	206.373	3									1																	1																1
hydrocarbons	79-92-5	camphene	camphene	C10H16	136.125	136.238	2									1																																	1
hydrocarbons	13466-78-9	carene 3-	3-carene / 3,7,7-Trimethylbicyclo[4.1.0]hept-3-ene	C10H16	136.125	136.238	5									1																			1														1
hydrocarbons	87-44-5	caryophyllene β-	β-caryophyllene	C15H24	204.188	204.357	5			1						1																	1		1														1
hydrocarbons	747-90-0	Cholesta-3,5-diene	Cholesta-3,5-diene	C27H44	368.344	368.649	2																														1
hydrocarbons	2436-90-0	citronellene b- / dihydromyrcene	β-citronellene / dihydromyrcene	C10H18	138.141	138.254	4			1						1																	1																1
hydrocarbons	3856-25-5	copaene α-	α-copaene	C15H24	204.188	204.357	5			1						1																	1		1														1
hydrocarbons	18252-44-3	copaene β-	β-copaene	C15H24	204.188	204.357	1																										1
hydrocarbons	17699-14-8	cubebene α-	α-cubebene	C15H24	204.188	204.357	3									1																	1																1
hydrocarbons	2198-20-1	cyclodecene	cyclodecene	C10H18	138.141	138.254	2			1						1
hydrocarbons	294-62-2	cyclododecane	cyclododecane	C12H24	168.188	168.324	3			1
hydrocarbons	544-25-2	cycloheptatriene 1,3,5- / tropilidene	1,3,5-cycloheptatriene / tropilidene	C7H8	92.0626	92.141	2																																										1
hydrocarbons	110-83-8	cyclohexene	cyclohexene	C6H10	82.0783	82.146	2									1																																	1
hydrocarbons	7124-40-5	Cyclooctadiene 1,2-	1,2-Cyclooctadiene	C8H12	108.094	108.184	1
hydrocarbons	292-64-8	Cyclooctane	Cyclooctane	C8H16	112.125	112.216	1
hydrocarbons	629-20-9	cyclooctatetraene 1,3,5,7- / [8]-annulene	1,3,5,7-cyclooctatetraene / [8]-annulene	C8H8	104.063	104.152	2																																										1
hydrocarbons	295-48-7	cyclopentadecane	cyclopentadecane	C15H30	210.235	210.405	3			1																							1																1
hydrocarbons	287-92-3	cyclopentane / pentamethylene	cyclopentane / pentamethylene	C5H10	70.0783	70.135	2																																										1
hydrocarbons	6568-33-8	Cyclotetradecene	Cyclotetradecene	C14H26	194.203	194.362	1
hydrocarbons	124-18-5	decane	decane	C10H22	142.172	142.286	7			1						1																																	1
hydrocarbons	20348-51-0	Decene (Z)-2-	(Z)-2-Decene	C10H20	140.156	140.27	1
hydrocarbons	19689-18-0	Decene 4-	4-Decene	C10H20	140.156	140.27	2
hydrocarbons	673-84-7	dehydro-allo-ocimene ????	dehydro-allo-ocimene ????	C10H16	136.125	136.238	2			1																																							1
hydrocarbons	135-01-3	Diethylbenzene 1,2-	1,2-Diethylbenzene	C10H14	134.11	134.222	1
hydrocarbons	105-05-5	Diethylbenzene 1,4-	1,4-Diethylbenzene	C10H14	134.11	134.222	2
hydrocarbons	6252-33-1	dihydrolimonene	dihydrolimonene	C10H18	138.141	138.254	4			1						1																	1		1
hydrocarbons	6874-32-4	dimethyl-(Z)-oct-2-ene 3,7-	3,7-dimethyl-(Z)-oct-2-ene	C10H20	140.156	140.27	2									1																																	1
hydrocarbons	1113-56-0	dimethyl-1,3-pentadiene 2,3-	2,3-dimethyl-1,3-pentadiene	C7H12	96.0939	96.173	2									1																																	1
hydrocarbons	na	dimethyl-2-isopropylcyclopropane 1,1-	1,1-Dimethyl-2-isopropylcyclopropane	C8H16	112.125	112.216	2									1																																	1
hydrocarbons	95-47-6	dimethylbenzene 1,2- / o-xylene	1,2-dimethylbenzene / o-xylene	C8H10	106.078	106.168	2																																										1
hydrocarbons	108-38-3	dimethylbenzene 1,3- / m-xylene	1,3-dimethylbenzene / m-xylene	C8H10	106.078	106.168	5									1																																	1
hydrocarbons	75-83-2	dimethylbutane 2,2-	2,2-dimethylbutane	C6H14	86.1096	86.178	3							1		1																																	1
hydrocarbons	61142-19-6	dimethylbutyl)cyclohexane (1,3-	(1,3-dimethylbutyl)cyclohexane	C12H24Br2	168.188	168.324	1									1
hydrocarbons	2801-84-5	dimethyldecane 2,4-	2,4-dimethyldecane	C12H26	170.203	170.34	2										1																																1
hydrocarbons	17312-50-4	dimethyldecane 2,5-	2,5-dimethyldecane	C12H26	170.203	170.34	1
hydrocarbons	61141-72-8	dimethyldodecane 4,6-	4,6-dimethyldodecane	C14H30	198.235	198.394	2										1
hydrocarbons	590-73-8	Dimethylhexane 2,2-	2,2-Dimethylhexane	C8H18	114.141	114.232	4
hydrocarbons	589-43-5	dimethylhexane 2,4-	2,4-dimethylhexane	C8H18	114.141	114.232	2																																										1
hydrocarbons	571-58-4	Dimethylnaphthalene 1,4-	1,4-Dimethylnaphthalene	C12H12	156.094	156.228	1
hydrocarbons	571-61-9	Dimethylnaphthalene 1,5-	1,5-Dimethylnaphthalene	C12H12	156.094	156.228	1
hydrocarbons	17302-32-8	Dimethylnonane 3,7-	3,7-Dimethylnonane	C11H24	156.188	156.313	1							1
hydrocarbons	463-82-1	Dimethylpropane 2,2- / neopentane	2,2-Dimethylpropane / neopentane	C5H12	72.0939	72.151	1							1
hydrocarbons	17312-64-0	dimethylundecane 2,2-	2,2-dimethylundecane	C13H28	184.219	184.367	2									1
hydrocarbons	17301-23-4	dimethylundecane 2,6-	2,6-dimethylundecane	C13H28	184.219	184.367	1			1
hydrocarbons	17301-28-9	dimethylundecane 3,6-	3,6-Dimethylundecane	C13H28	184.219	184.367	1
hydrocarbons	629-97-0	docosane	docosane	C22H46	310.36	310.61	7									1																			1														1
hydrocarbons	na	docosene (Z)-7-	(Z)-7-Docosene	C22H44	308.344	308.594	7									1																			1														1
hydrocarbons	na	docosene (Z)-9-	(Z)-9-Docosene	C22H44	308.344	308.594	7									1																			1														1
hydrocarbons	112-40-3	dodecane	dodecane	C12H26	170.203	170.34	7			1						1																			1														1
hydrocarbons	24252-85-5	Dodecatriene (E,E,E)-1,4,8-	(E,E,E)-1,4,8-Dodecatriene	C12H20	164.156	164.292	1
hydrocarbons	112-95-8	eicosane	eicosane	C20H42	282.329	282.556	4			1							1																																1
hydrocarbons	42448-90-8 ui	eicosene (Z)-9-	(Z)-9-Eicosene	C20H40	280.313	280.54	3
hydrocarbons	74685-33-9	eicosene 3-	3-eicosene	C20H40	280.313	280.54	2
hydrocarbons	62183-55-5	Ethyl-2,7-dimethyloctane 3-	3-Ethyl-2,7-dimethyloctane	C12H26	170.203	170.34	1
hydrocarbons	19780-60-0	ethyl-2-methyl-1-heptene 3-	3-ethyl-2-methyl-1-heptene	C10H20	140.156	140.27	1									1
hydrocarbons	620-14-4	ethyl-3-methylbenzene 1- / 3-ethyltoluene	1-ethyl-3-methylbenzene / 3-ethyltoluene / m-ethyltoluene	C9H12	120.094	120.195	1
hydrocarbons	3726-47-4	Ethyl-3-methylcyclopentane 1-	1-Ethyl-3-methylcyclopentane	C8H16	112.125	112.216	1
hydrocarbons	622-96-8	ethyl-4-methylbenzene 1- / 4-ethyltoluene	1-ethyl-4-methylbenzene / 4-ethyltoluene	C9H12	120.094	120.195	3																																										1
hydrocarbons	100-41-4	ethylbenzene / phenylethane	ethylbenzene / phenylethane	C8H10	106.078	106.168	8							1		1		1																	1									1					1
hydrocarbons	939-27-5	Ethylnaphthalene 2-	2-Ethylnaphthalene	C12H12	156.094	156.228	1
hydrocarbons	18794-84-8	farnesene (E)-b- / (E)-7,11-Dimethyl-3-methylene-1,6,10-dodecatriene	(E)-beta-farnesene / (E)-7,11-Dimethyl-3-methylene-1,6,10-dodecatriene	C15H24	204.188	204.257	5		1						1
hydrocarbons	502-61-4	farnesene α-(E,E)-	α-(E,E)-farnesene / (E,E)-3,7,11-Trimethyl-1,3,6,10-dodecatetraene	C15H24	204.188	204.257	7		1						1																		1		1														1
hydrocarbons	37839-63-7	germacrene D	germacrene D	C15H28	208.219	208.389	3									1																	1		1
hydrocarbons	629-94-7	heneicosane	heneicosane	C21H42	294.329	294.567	2
hydrocarbons	27400-79-9	Heneicosene	Heneicosene	C21H42	294.329	294.567	1
hydrocarbons	na	heneicosene (Z)-7-	(Z)-7-Heneicosene	C21H42	294.329	294.567	2
hydrocarbons	na	heneicosene (Z)-9-	(Z)-9-Heneicosene	C21H42	294.329	294.567	2
hydrocarbons	630-04-6	hentriacontane	hentriacontane	C31H64	436.501	436.853	1										1
hydrocarbons	629-78-7	Heptadecane	heptadecane	C17H36	240.282	240.475	3																																						1
hydrocarbons	na	Heptadecene (Z)-7-	(Z)-7-Heptadecene	C17H34	238.266	238.459	1
hydrocarbons	na	Heptadecene (Z)-9-	(Z)-9-Heptadecene	C17H34	238.266	238.459	1
hydrocarbons	4390-04-9	heptamethylnonane 2,2,4,4,6,8,8- / isocetane	2,2,4,4,6,8,8-heptamethylnonane / isocetane	C16H34	226.266	226.448	2
hydrocarbons	142-82-5	heptane	heptane	C7H16	100.125	100.205	6						1			1		1																															1
hydrocarbons	592-76-7	heptene	heptene	C7H14O2	98.1096	98.189	2									1																																	1
hydrocarbons	544-76-3	hexadecane	hexadecane	C16H34	226.266	226.448	8			1						1																			1														1
hydrocarbons	35507-09-6	Hexadecene (Z)-7-	(Z)-7-Hexadecene	C16H32	224.25	224.432	2
hydrocarbons	629-73-2	Hexadecene 1-	1-Hexadecene	C16H32	224.25	224.432	1
hydrocarbons	592-46-1	hexadiene 2,4-, ui	2,4-hexadiene, ui	C6H10	82.0783	82.146	2									1																																	1
hydrocarbons	110-54-3	hexane	hexane	C6H14	86.1096	86.178	9									1		1																															1
hydrocarbons	592-41-6	hexene	hexene	C6H12	84.0939	84.162	2									1																																	1
hydrocarbons	6753-98-6	humulene α- / α-caryophyllene	α-humulene / α-caryophyllene	C15H24	204.188	204.357	5			1						1																	1																1
hydrocarbons	78-79-5	isoprene	isoprene	C5H8	68.0626	68.119	2											1																															1
hydrocarbons	99-87-6	isopropyltoluene 4- / p-cymene	4-isopropyltoluene / p-cymene	C10H14	134.11	134.222	8									1																	1																1
hydrocarbons	138-86-3	limonene	limonene / 1-Methyl-4-(1-methylethenyl)-cyclohexene	C10H16	136.125	136.238	13			1						1		1															1		1														1
hydrocarbons	5989-27-5	limonene D-	D-limonene	C10H16	136.125	136.238	4									1																																	1
hydrocarbons	500-00-5	menthene 3-p-	3-p-menthene	C10H18	138.141	138.254	3																										1		1														1
hydrocarbons	74-82-8	methane	methane	CH4	16.0313	16.043	2																												1														1
hydrocarbons	78-78-4	methyl butane 2- / isopentane	2-methyl butane / isopentane	C5H12	72.0939	72.151	2									1																																	1
hydrocarbons	1680-51-9	Methyl-1,2,3,4-tetrahydronaphthalene 6-	6-Methyl-1,2,3,4-tetrahydronaphthalene	C11H14	146.11	146.233	1
hydrocarbons	13151-27-4	Methyl-1-decene 2-	2-Methyl-1-decene	C11H22	154.172	154.297	1
hydrocarbons	115-11-7	methyl-1-propene 2- / isobutylene / 1,1-dimethylethylene	2-methyl-1-propene / isobutylene / 1,1-dimethylethylene	C4H8	56.0626	56.108	2																																										1
hydrocarbons	535-77-3	methyl-3-(1-methylethyl)-benzene 1- / m-cymene	1-methyl-3-(1-methylethyl)-benzene / m-cymene	C10H14	134.11	134.222	2									1																																	1
hydrocarbons	13828-31-4	methyl-3-(1-methylethyl)cyclohexene 1-	1-methyl-3-(1-methylethyl)cyclohexene	C10H18	138.141	138.254	2									1																																	1
hydrocarbons	86668-33-9 (ui)	Methyl-3-octene (E)-7-	(E)-7-Methyl-3-octene	C9H18	126.141	126.243	1
hydrocarbons	1074-43-7	methyl-3-propylbenzene 1-	1-methyl-3-propylbenzene	C10H14	134.11	134.222	2																																										1
hydrocarbons	1074-55-1	methyl-4-propylbenzene 1-	1-methyl-4-propylbenzene	C10H14	134.11	134.222	2																																										1
hydrocarbons	55045-08-4	methyl-6-propyldodecane 2-	2-methyl-6-propyldodecane	C16H34	226.266	226.448	1			1
hydrocarbons	13151-43-4	Methylcyclodecane	Methylcyclodecane	C11H22	154.172	154.297	1
hydrocarbons	96-37-7	methylcyclopentane / methylpentamethylene	methylcyclopentane / methylpentamethylene	C6H12	84.0939	84.162	3																												1														1
hydrocarbons	2847-72-5	methyldecane 4-	4-methyldecane	C11H24	156.188	156.313	2																																										1
hydrocarbons	6117-97-1	methyldodecane 4-	4-methyldodecane	C13H28	184.219	184.367	2			1
hydrocarbons	6044-71-9	Methyldodecane 6-	6-Methyldodecane	C13H28	184.219	184.367	1
hydrocarbons	98-82-8	methylethylbenzene 1- / cumene	1-methylethylbenzene / cumene	C9H12	120.094	120.195	2									1																																	1
hydrocarbons	6418-44-6	methylheptadecane 3-	3-methylheptadecane	C18H38	254.297	254.502	1
hydrocarbons	592-27-8	methylheptane 2-	2-methylheptane	C8H18	114.141	114.232	3						1																																				1
hydrocarbons	589-81-1	methylheptane 3-	3-methylheptane	C8H18	114.141	114.232	2																																										1
hydrocarbons	1560-92-5	Methylhexadecane 2-	2-methylhexadecane	C17H36	240.282	240.475	1
hydrocarbons	591-76-4	Methylhexane 2-	2-Methylhexane	C7H16	100.125	100.205	1						1
hydrocarbons	589-34-4	methylhexane 3-	3-methylhexane	C7H16	100.125	100.205	3									1																																	1
hydrocarbons	90-12-0	methylnaphthalene	methylnaphthalene	C11H10	142.078	142.201	2																										1																1
hydrocarbons	91-57-6	methylnaphthalene 2-	2-methylnaphthalene	C11H10	142.078	142.201	3
hydrocarbons	57160-72-2	methylnonadecane 5-	5-methylnonadecane	C20H42	282.329	282.556	3			1
hydrocarbons	13287-24-6	methylnonadecane 9-	9-methylnonadecane	C20H42	282.329	282.556	2			1
hydrocarbons	871-83-0	methylnonane 2- / isodecane	2-methylnonane / isodecane	C10H22	142.172	142.286	3																																										1
hydrocarbons	3221-61-2	Methyloctane 2-	2-Methyloctane	C9H20	128.156	128.259	1						1
hydrocarbons	107-83-5	methylpentane 2- / isohexane	2-methylpentane / isohexane	C6H14	86.1096	86.178	4									1																			1														1
hydrocarbons	96-14-0	methylpentane 3-	3-methylpentane	C6H14	86.1096	86.178	3											1																															1
hydrocarbons	1560-95-8	methyltetradecane 2-	2-methyltetradecane	C15H32	212.25	212.421	3			1																							1		1
hydrocarbons	6418-41-3	Methyltridecane 3-	3-Methyltridecane	C14H30	198.235	198.394	1
hydrocarbons	25117-31-1	methyltridecane 5-	5-methyltridecane	C14H30	198.235	198.394	1			1
hydrocarbons	7045-71-8	Methylundecane 2-	2-Methylundecane	C12H26	170.203	170.34	1						1
hydrocarbons	1686-30-2	myrcene α-	α-myrcene	C10H16	136.125	136.238	1
hydrocarbons	123-35-3	myrcene β-	β-myrcene	C10H16	136.125	136.238	4									1																																	1
hydrocarbons	91-20-3	naphthalene	naphthalene	C10H8	128.063	128.174	5									1																																	1
hydrocarbons	630-03-5	nonacosane	nonacosane	C29H60	408.469	408.799	1										1
hydrocarbons	629-92-5	Nonadecane	Nonadecane	C19H40	268.313	268.529	2
hydrocarbons	na	nonadecene (Z)-7-	(Z)-7-Nonadecene	C19H38	266.297	266.513	1
hydrocarbons	na	nonadecene (Z)-9-	(Z)-9-Nonadecene	C19H38	266.297	266.513	1
hydrocarbons	111-84-2	nonane	nonane	C9H20	128.156	128.259	8			1						1					1	1																						1					1
hydrocarbons	74663-85-7	nonyl cyclopropane	nonyl cyclopropane	C12H24	168.188	168.191	2
hydrocarbons	3779-61-1	ocimene (E)-	(E)-ocimene	C10H16	136.125	136.238	4			1						1																			1														1
hydrocarbons	630-02-4	octacosane	octacosane	C28H58	394.454	394.772	2										1																																1
hydrocarbons	593-45-3	Octadecane	octadecane	C18H38	254.297	254.502	3
hydrocarbons	112-88-9	octadecene 1-	1-octadecene	C18H36	252.282	252.486	4																																										1
hydrocarbons	5557-31-3	octadecene 9-	9-octadecene	C18H36	252.282	252.486	3																																										1
hydrocarbons	111-65-9	octane	octane	C8H18	114.141	114.232	6						1			1																												1		1			1
hydrocarbons	14850-23-8	octene (E)-4-	(E)-4-octene	C8H16	112.125	112.216	1																									1
hydrocarbons	111-66-0	octene 1-	1-octene	C8H16	112.125	112.216	3									1																1																	1
hydrocarbons	592-99-4	octene, 4-	4-octene	C8H16	112.125	112.216	1																																										1
hydrocarbons	629-62-9	pentadecane	pentadecane	C15H32	212.25	212.421	8			1						1												1							1														1
hydrocarbons	13360-61	Pentadecene 1-	1-Pentadecene	C15H30	210.235	210.405	1
hydrocarbons	591-93-5	pentadiene 1,4-	1,4-pentadiene	C5H8	68.0626	68.119	2																																										1
hydrocarbons	1574-41-0	pentadiene cis-1,3-	cis-1,3-pentadiene	C5H8	68.0626	68.119	2											1																															1
hydrocarbons	13475-82-6	pentamethyl-heptane 2,2,4,6,6- / permthyl 99A	2,2,4,6,6-pentamethyl-heptane / permthyl 99A	C12H26	170.203	170.34	1
hydrocarbons	109-66-0	pentane	pentane	C5H12	72.0939	72.151	4									1		1																															1
hydrocarbons	109-67-1	pentene	1-pentene	C5H10	70.0783	70.135	3									1																																	1
hydrocarbons	99-83-2	phellandrene α-	α-phellandrene / 5-Isopropyl-2-methylcyclohexa-1,3-diene	C10H16	136.125	136.238	3									1																																	1
hydrocarbons	4537-13-7	Phenyl Decane 2-	2-Phenyl Decane	C16H26	218.203	218.384	1
hydrocarbons	4621-36-7	Phenyl Decane 3-	3-Phenyl Decane	C16H26	218.203	218.384	1
hydrocarbons	4537-12-6	Phenyl Decane 4-	4-Phenyl Decane	C16H26	218.203	218.384	1
hydrocarbons	4537-11-5	Phenyl Decane 5-	5-Phenyl Decane	C16H26	218.203	218.384	1
hydrocarbons	na	Phenyl Decane 6-	6-Phenyl Decane	C16H26	218.203	218.384	1
hydrocarbons	2719-61-1	Phenyl Dodecane 2-	2-Phenyl Dodecane	C18H30	246.235	246.438	1
hydrocarbons	2400-00-2	Phenyl Dodecane 3-	3-Phenyl Dodecane	C18H30	246.235	246.438	1
hydrocarbons	2719-64-4	Phenyl Dodecane 4-	4-Phenyl Dodecane	C18H30	246.235	246.438	1
hydrocarbons	2719-62-2	Phenyl Dodecane 6-	6-Phenyl Dodecane	C18H30	246.235	246.438	1
hydrocarbons	4536-88-3	Phenyl Undecane 2-	2-Phenyl Undecane	C17H28	232.219	232.411	1
hydrocarbons	4536-87-2	Phenyl Undecane 3-	3-Phenyl Undecane	C17H28	232.219	232.411	1
hydrocarbons	6876-13-7	pinane cis-	cis-pinane	C10H18	138.141	138.254	3			1						1																			1
hydrocarbons	10281-53-5	pinane trans- (33626-25-4)	trans-pinane	C10H18	138.141	138.254	3									1																			1														1
hydrocarbons	80-56-8	pinene α-	α-pinene / 2,6,6-Trimethylbicyclo[3.1.1]hept-2-ene	C10H16	136.125	136.238	10			1						1																	1		1														1
hydrocarbons	127-91-3	pinene β-	β-pinene / 6,6-Dimethyl-2-methylenebicyclo[3.1.1]heptane	C10H16	136.125	136.238	6									1																																	1
hydrocarbons	2077-30-7	p-methylpropenylbenzene	(E)-1-methyl-4-(prop-1-enyl)-benzene / (E)-1-(4-Methylphenyl)propene / p-methylpropenylbenzene	C10H12	132.094	132.206	1
hydrocarbons	115-07-1	propene / methylethylene	propene / methylethylene	C3H6	42.047	42.081	2																																										1
hydrocarbons	637-50-3	propenylbenzene, 1-	1-propenylbenzene	C9H10	118.078	118.179	2									1																																	1
hydrocarbons	103-65-1	propylbenzene	propylbenzene	C9H12	120.094	120.195	4									1																												1					1
hydrocarbons	4536-86-1	propyloctyl)benzene (1- / 4-phenylundecane	(1-propyloctyl)benzene / 4-phenylundecane	C17H28	232.219	232.411	3			1																																							1
hydrocarbons	1074-17-5	propyltoluene 2- / o-propyltouene / 1-methyl-2-propylbenzene	2-propyltoluene / o-propyltouene / 1-methyl-2-propylbenzene	C10H14	134.11	134.222	1
hydrocarbons	17066-67-0	selinene b-	β-selinene	C15H24	204.188	204.357	2									1																																	1
hydrocarbons	77898-97-6	springene (E,E,E)-a-/ (E,E,E)-3,7,11,15-Tetramethylhexadeca-1,3,6,10,14-pentaene	E,E,E-alpha-springene / (E,E,E)-3,7,11,15-Tetramethylhexadeca-1,3,6,10,14-pentaene	C20H32	272.25	272.476	3								1																																1	1
hydrocarbons	na	springene (Z,E,E)-a-/ (Z,E,E)-3,7,11,15-Tetramethylhexadeca-1,3,6,10,14-pentaene	(Z,E,E)-alpha-springene / (Z,E,E)-3,7,11,15-Tetramethylhexadeca-1,3,6,10,14-pentaene	C20H32	272.25	272.476	3								1																																1	1
hydrocarbons	70901-63-2	springene b-/ (E,E)-7,11,15-Trimethyl-3-methylene-1,6,10,14-hexadecatetraene	beta-springene / (E,E)-7,11,15-Trimethyl-3-methylene-1,6,10,14-hexadecatetraene	C20H32	272.25	272.476	3								1																																1	1
hydrocarbons	111-02-4	squalene	squalene / (6E,10E,14E,18E)-2,6,10,15,19,23-Hexamethyl-2,6,10,14,18,22-tetracosahexaene	C30H50	410.391	410.73	21														1	1																									1	1	1
hydrocarbons	100-42-5	styrene	styrene	C8H8	104.063	104.152	7									1		1																										1					1
hydrocarbons	99-86-5	terpinene α-	α-terpinene	C10H16	136.125	136.238	3									1																	1																1
hydrocarbons	99-85-4	terpinene γ-	γ-terpinene / 1-Isopropyl-4-methyl-cyclohexa-1,4-diene	C10H16	136.125	136.238	4									1																			1														1
hydrocarbons	586-62-9	terpinolene / δ-terpinene	terpinolene / δ-terpinene	C10H16	136.125	136.238	5			1						1																	1		1														1
hydrocarbons	21964-49-8	Tetradecadiene 1,13-	1,13-Tetradecadiene	C14H26	194.203	194.362	1
hydrocarbons	629-59-4	tetradecane	tetradecane	C14H30	198.235	198.394	7			1				1		1																																	1
hydrocarbons	41446-78-0	tetradecene	tetradecene	C14H28	196.219	196.378	3			1						1																																	1
hydrocarbons	638-36-8	tetramethylhexadecane 2,6,10,14- / phytan	2,6,10,14-tetramethylhexadecane / phytan	C20H42	282.329	282.556	3			1						1	1
hydrocarbons	1070-87-7	Tetramethylpentane 2,2,4,4-	2,2,4,4-Tetramethylpentane	C9H20	128.156	128.259	4
hydrocarbons	470-40-6	thujopsene	thujopsene	C15H24	204.188	204.357	1
hydrocarbons	108-88-3	toluene	toluene	C7H8	92.0626	92.141	9									1																1			1									1					1
hydrocarbons	638-67-5	tricosane	tricosane	C23H48	324.376	324.637	1
hydrocarbons	646-31-1	tricosane	tetracosane	C24H50	338.391	338.64	1
hydrocarbons	629-99-2	tricosane	pentacosane	C25H52	352.407	352.691	1
hydrocarbons	52078-42-9	tricosene (Z)-7-	(Z)-7-tricosene	C23H46	322.36	322.621	1
hydrocarbons	na	tricosene (Z)-7-	(Z)-7-Tetracosene	C24H48	336.376	336.648	1
hydrocarbons	63623-49-4	tricosene (Z)-7-	(Z)-7-pentacosene	C25H50	350.391	350.675	1
hydrocarbons	27519-02-4	tricosene (Z)-9-	(Z)-9-tricosene	C23H46	322.36	322.621	1
hydrocarbons	50995-30-7	tricosene (Z)-9-	(Z)-9-tetracosene	C24H48	336.376	336.648	1
hydrocarbons	51865-00-0	tricosene (Z)-9-	(Z)-9-pentacosene	C25H50	350.391	350.675	1
hydrocarbons	508-32-7	tricyclene	tricyclene	C10H16	136.125	136.238	2									1																																	1
hydrocarbons	629-50-5	tridecane	tridecane	C13H28	184.219	184.367	10			1				1		1																	1		1														1
hydrocarbons	2437-56-1	Tridecene 1-	1-Tridecene	C13H26	182.203	182.351	2
hydrocarbons	24949-38-0	Tridecene 6-	6-Tridecene	C13H26	182.203	182.351	1
hydrocarbons	na	Trimethyl Tetradecane	Trimethyl Tetradecane	C17H36	240.282	240.475	1
hydrocarbons	526-73-8	trimethylbenzene 1,2,3-	1,2,3-trimethylbenzene	C9H12	120.094	120.195	2																																										1
hydrocarbons	95-63-6	trimethylbenzene 1,2,4-	1,2,4-trimethylbenzene	C9H12	120.094	120.195	3																																										1
hydrocarbons	108-67-8	trimethylbenzene 1,3,5- / mesitylene	1,3,5-trimethylbenzene / mesitylene	C9H12	120.094	120.195	3																																										1
hydrocarbons	933-12-0	trimethylcyclohexene 3,3,5	3,3,5-trimethylcyclohexene	C9H16	124.125	124.227	2									1																																	1
hydrocarbons	62108-26-3	Trimethyldecane 2,6,8-	2,6,8-Trimethyldecane	C13H28	184.219	184.367	1
hydrocarbons	31295-56-4	trimethyldodecane 2,6,11-	2,6,11-trimethyldodecane	C15H32	212.25	212.421	3										1																																1
hydrocarbons	33501-88-1	trimethylhepta-1,5-diene 2,3,6-	2,3,6-trimethylhepta-1,5-diene	C10H18	138.141	138.254	2									1																																	1
hydrocarbons	2613-61-8	trimethylheptane 2,4,6-	2,4,6-trimethylheptane	C10H22	142.172	142.286	2																																										1
hydrocarbons	1069-53-0	trimethylhexane 2,3,5-	2,3,5-trimethylhexane	C9H20	128.156	128.259	2			1																																							1
hydrocarbons	62016-37-9	Trimethyloctane 2,4,6-	2,4,6-Trimethyloctane	C11H24	156.188	156.313	1
hydrocarbons	1120-21-4	undecane	undecane	C11H24	156.188	156.313	12			1				1		1																			1														1
hydrocarbons	821-95-4	undecene 1-	1-undecene	C11H22	154.172	154.297	1
hydrocarbons	106-42-3	xylene p-	p-xylene / 1,4-dimethylbenzene	C8H10	106.078	106.168	5									1																																	1
hydrocarbons	ui	xylenes	xylenes	C8H10	106.078	106.168	3																												1														1
ketals/acetals	na	dehydro-exo-brevicomin 3,4- / Ethyl-5-methyl-6,8-dioxabicyclo[3.2.1]oct-3-ene (1R,5S,7R)-7-	3,4-dehydro-exo-brevicomin / (1R,5S,7R)-7-Ethyl-5-methyl-6,8-dioxabicyclo[3.2.1]oct-3-ene	C9H14O2	154.099	154.209	1
ketals/acetals	105-57-7	diethoxyethane 1,1- / diethyl acetal	1,1-diethoxyethane / diethyl acetal	C6H14O2	118.099	118.176	2									1																																	1
ketals/acetals	933-40-4	Dimethoxycyclohexane 1,1- / cyclohexanone dimethyl ketal	1,1-Dimethoxycyclohexane / cyclohexanone dimethyl ketal	C8H16O2	144.115	144.214	1
ketals/acetals	62532-53-0	endo-brevicomin / endo-7-Ethyl-5-methyl-6,8-dioxabicyclo[3.2.1]octane	endo-brevicomin / endo-7-Ethyl-5-methyl-6,8-dioxabicyclo[3.2.1]octane	C9H16O2	156.115	156.225	1		1
ketals/acetals	60018-04-4	exo-brevicomin / exo-7-Ethyl-5-methyl-6,8-dioxabicyclo[3.2.1]octane	exo-brevicomin / exo-7-Ethyl-5-methyl-6,8-dioxabicyclo[3.2.1]octane	C9H16O2	156.115	156.225	1		1
ketals/acetals	28401-39-0 ui	frontalin (1R,5S)- / (1R,5S)-1,5-Dimethyl-6,8-dioxabicyclo[3.2.1]octane	(1R,5S)-frontalin / (1R,5S)-1,5-Dimethyl-6,8-dioxabicyclo[3.2.1]octane	C8H14O2	142.099	142.198	2	1	1
ketones	1192-62-7	(Furan-2-yl)-ethanone 1- / 2-acetylfuran	1-(Furan-2-yl)-ethanone / 2-acetylfuran	C6H6O2	110.037	110.112	1
ketones	na	(Z)-11-Octadecen-2-one	(Z)-11-Octadecen-2-one	C18H34O	266.261	266.469	1
ketones	10519-33-2	3-Decen-2-one	3-Decen-2-one	C10H18O	154.136	154.253	1
ketones	67-64-1	acetone	acetone / propan-2-one / propanone	C3H6O	58.0419	58.08	12									1		1															1											1					1
ketones	98-86-2	acetophenone	acetophenone / 1-phenylethanone	C8H8O	120.058	120.151	21			1						1			1										1																				1
ketones	18339-16-7	androst-16-en-3-one 5a-	5α-androst-16-en-3-one	C19H28O	272.214	272.432	4																												1		1	1											1
ketones	963-75-7	Androst-2-en-17-one 5a-	5alpha-Androst-2-en-17-one	C19H28O	272.214	272.432	1	1
ketones	1912-63-6	Androstadien-17-one 3,5-	3,5-Androstadien-17-one	C19H26O	270.198	270.416	1																																							1
ketones	10226-29-6	Bromohexan-2-one 6-	6-Bromohexan-2-one	C6H11BrO	177.999	179.057	1
ketones	431-03-8	butanedione 2,3-	2,3-butanedione / diacetyl	C4H6O2	86.0368	86.09	5									1																																	1
ketones	78-93-3	butanone 2- / methyl ethyl ketone	2-butanone / methyl ethyl ketone	C4H8O	72.0575	72.107	11									1		1																															1
ketones	76-22-2	camphor	camphor	C10H16O	152.12	152.237	3									1																																	1
ketones	601-57-0	Cholest-4-en-3-one	Cholest-4-en-3-one	C27H44O	384.339	384.648	1
ketones	na	Cycloheptadec-5-ynone	Cycloheptadec-5-ynone	C17H28O	248.214	248.41	1
ketones	na	Cycloheptadecadienone (Z,Z)-5,11-	(Z,Z)-5,11-Cycloheptadecadienone	C17H28O	248.214	248.41	1
ketones	3661-77-6	Cycloheptadecanone	Cycloheptadecanone	C17H32O	252.245	252.442	2
ketones	na	Cycloheptadecen-5-ynone (Z)-7-	(Z)-7-Cycloheptadecen-5-ynone	C17H26O	246.198	246.394	1
ketones	na	Cycloheptadecenone (Z)-5-	(Z)-5-Cycloheptadecenone	C17H30O	250.23	250.426	1
ketones	na	Cycloheptadecenone (Z)-6-	(Z)-6-Cycloheptadecenone	C17H30O	250.23	250.426	1
ketones	na	Cycloheptadecenone (Z)-7-	(Z)-7-Cycloheptadecenone	C17H30O	250.23	250.426	1
ketones	542-46-1	Cycloheptadecenone (Z)-9-	(Z)-9-Cycloheptadecenone	C17H30O	250.23	250.426	1
ketones	2550-52-9	Cyclohexadecanone	Cyclohexadecanone	C16H30O	238.23	238.415	1
ketones	108-94-1	cyclohexanone	cyclohexanone	C6H10O	98.0732	98.145	6	1								1																																	1
ketones	na	Cyclononadecanone	Cyclononadecanone	C19H36O	280.277	280.496	1
ketones	na	Cyclononadecenone (Z)-9-	(Z)-9-Cyclononadecenone	C19H34O	278.261	278.48	1
ketones	502-72-7	Cyclopentadecanone	Cyclopentadecanone	C15H28O	224.214	224.388	1
ketones	na	Cyclopentadecenone (Z)-5-	(Z)-5-Cyclopentadecenone	C15H26O	222.198	222.372	1
ketones	930-30-3	cyclopenten-1-one 2-	2-cyclopenten-1-one	C5H6O	82.0419	82.102	2				1																																						1
ketones	765-43-5	cyclopropylethanone 1-	1-cyclopropylethanone	C5H8O	84.0575	84.118	2										1																																1
ketones	928-80-3	Decan-3-one	Decan-3-one	C10H20O	156.151	156.269	1												1
ketones	na	Decane-2,5-dione	Decane-2,5-dione	C10H18O2	170.131	170.252	2														1	1
ketones	693-54-9	decanone 2-	2-decanone	C10H20O	156.151	156.269	4																									1																	1
ketones	7764-50-3	dihydrocarvone	dihydrocarvone	C10H16O	152.12	152.237	1									1
ketones	3792-53-8	dihydrocarvone cis-	cis-dihydrocarvone	C10H16O	152.12	152.237	1																										1
ketones	17283-81-7	dihydro-β-ionone	dihydro-β-ionone	C13H20O	192.151	192.302	1			1
ketones	na	Dimethoxy-1-phenylethanone 2,2-	2,2-Dimethoxy-1-phenylethanone	C10H12O3	180.079	180.203	1
ketones	3796-70-1	dimethyl-5,9-undecadien-2-one (E)-6,10- / geranylacetone	geranyl acetone / (E)-6,10-dimethyl-5,9-undecadien-2-one	C13H22O	194.167	194.318	16								1	1																1																	1
ketones	91811-29-9	Dimethyl-2-decanone 3,5-	3,5-Dimethyldecan-2-one	C12H24O	184.183	184.323	1
ketones	3664-75-3	Dimethylcyclopentyl, 2,2-), 1- ethanone	1-(2,2-dimethylcyclopentyl)ethanone	C9H16O	140.12	140.226	1			1
ketones	5405-79-8	Dimethylhexan-3-one 2,2-	2,2-Dimethylhexan-3-one	C8H16O	128.12	128.215	1							1
ketones	19781-14-7	Dimethyloctan-2-one 3,5-	3,5-Dimethyloctan-2-one	C10H20O	156.151	156.269	1
ketones	1604-34-8	Dimethylundecan-2-one 6,10-	6,10-Dimethylundecan-2-one	C13H26O	198.198	198.35	1
ketones	94-41-7	diphenyl-2-propen-1-one 1,3-	1,3-diphenyl-2-propen-1-one	C15H12O	208.089	208.26	1
ketones	6175-49-1	dodecanone 2-	2-dodecanone	C12H24O	184.183	184.323	3									1																1																	1
ketones	29703-52-4	Eicosan-2-one	Eicosan-2-one	C20H40O	296.308	296.539	1
ketones	na	Epoxydodecan-2-one 3,4-	3,4-Epoxydodecan-2-one	C12H22O2	198.162	198.306	1																					1
ketones	10264-55-8	Ethylcyclopentanone 3-	3-Ethylcyclopentanone	C7H12O	112.089	112.172	1
ketones	6137-09-3	ethylheptan-2-one 3-	3-ethylheptan-2-one	C9H18O	142.136	142.242	1
ketones	6137-03-7	Ethylpentan-2-one 3-	3-Ethylpentan-2-one	C7H14O	114.105	114.188	1
ketones	1117-52-8	farnesyl acetone (E,E)- / (E,E)-6,10,14-Trimethyl-5,9,13-pentadecatrien-2-one	(E,E)-farnesyl acetone / (E,E)-6,10,14-Trimethyl-5,9,13-pentadecatrien-2-one	C18H30O	262.23	262.437	1								1
ketones	22589-04-4	Heneicosan-2-one	Heneicosan-2-one	C21H42O	310.324	310.566	2																					1
ketones	na	Heneicosen-2-one (Z)-8-	(Z)-8-Heneicosen-2-one	C21H40O	308.308	308.55	1
ketones	2922-51-2	Heptadecan-2-one	Heptadecan-2-one	C17H34O	254.261	254.458	6																					1
ketones	na	Heptadecen-2-one (Z)-8-	(Z)-8-Heptadecen-2-one	C17H32O	252.245	252.442	1
ketones	7307-02-0	Heptanedione 2,4-	2,4-Heptanedione	C7H12O2	128.084	128.171	1
ketones	110-43-0	heptanone 2-	2-heptanone / heptan-2-one	C7H14O	114.105	114.188	25			1						1		1	1		1	1																											1
ketones	106-35-4	heptanone 3-	3-heptanone / heptan-3-one	C7H14O	114.105	114.188	4			1						1			1																														1
ketones	123-19-3	heptanone 4-	4-heptanone / heptan-4-one	C7H14O	114.105	114.188	14			1									1																										1				1
ketones	5609-09-6	Hepten-2-one (E)-3-	(E)-3-Hepten-2-one	C7H12O	112.089	112.172	1
ketones	1119-44-4	Hepten-2-one 3-	3-Hepten-2-one	C7H12O	112.089	112.172	3
ketones	18787-63-8	Hexadecan-2-one	Hexadecan-2-one	C16H32O	240.245	240.431	1
ketones	na	Hexadecen-2-one (Z)-8-	(Z)-8-Hexadecen-2-one	C16H30O	238.23	238.415	1
ketones	110-13-4	hexandione 2,5-	2,5-hexandione	C6H10O2	114.068	114.144	3																																										1
ketones	3002-24-2	hexanedione 2,4-	2,4-hexanedione	C6H10O2	114.068	114.144	1
ketones	591-78-6	hexanone 2-	2-hexanone	C6H12O	100.089	100.161	9	1										1	1		1																												1
ketones	589-38-8	hexanone 3-	3-hexanone / hexan-3-one	C6H12O	100.089	100.161	9			1								1	1																														1
ketones	763-93-9	hexen-2-one 3-	3-hexen-2-one	C6H10O	98.0732	98.145	3									1																																	1
ketones	513-86-0	hydroxy-2-butanone 3- / acetoin	3-hydroxy-2-butanone / acetoin	C4H8O2	88.0524	88.106	2																																										1
ketones	115-22-0	hydroxy-3-methyl-2-butanone 3-	3-hydroxy-3-methyl-2-butanone	C5H10O2	102.068	102.133	1
ketones	123-42-2	hydroxy-4-methyl-2-pentanone 4- / diacetone alcohol	4-hydroxy-4-methyl-2-pentanone / diacetone alcohol	C6H12O2	116.084	116.16	3									1
ketones	na	Hydroxy-6-methylheptan-3-one 6-	6-Hydroxy-6-methylheptan-3-one	C8H16O2	144.115	144.214	1
ketones	na	Hydroxy-7-methyloctan-3-one 1-	1-Hydroxy-7-methyloctan-3-one	C9H18O2	158.131	158.241	1																																						1
ketones	58-27-5	Methyl-1,4-naphthoquinone 2- / menadione	2-Methyl-1,4-naphthoquinone / menadione	C11H8O2	172.052	172.183	1
ketones	na	methyl-1-octen-3-one 7-	7-Methyl-1-octen-3-one	C9H16O	140.12	140.226	1																																						1
ketones	563-80-4	methyl-2-butanone 3-	3-methyl-2-butanone / 3-Methylbutan-2-one	C5H10O	86.0732	86.134	4											1	1																														1
ketones	565-61-7	methyl-2-pentanone 3-	3-methyl-2-pentanone / 3-Methylpentan-2-one	C6H12O	100.089	100.161	3											1	1																														1
ketones	1604-28-0	Methyl-3,5-heptadien-2-one 6-	6-Methyl-3,5-heptadien-2-one	C8H12O	124.089	124.183	1								1
ketones	6137-11-7	methyl-3-heptanone 4-	4-methyl-3-heptanone / 4-Methylheptan-3-one	C8H16O	128.12	128.215	3			1
ketones	10408-15-8	Methyl-6-hepten-2-one 6-	6-Methyl-6-hepten-2-one	C8H14O	126.105	126.199	1
ketones	1757-42-2	Methylcyclopentanone 3-	3-Methylcyclopentanone	C6H10O	98.0732	98.145	2
ketones	110-93-0	methylhept-5-en-2-one 6-/ sulcatone	6-methylhept-5-en-2-one / sulcatone	C8H12O	124.089	124.183	15			1					1	1		1														1	1																1
ketones	2371-19-9	Methylheptan-2-one 3-	3-Methylheptan-2-one	C8H16O	128.12	128.215	1												1
ketones	928-68-7	methylheptan-2-one 6-	6-methylheptan-2-one	C8H16O	128.12	128.215	4									1																									1				1				1
ketones	541-85-5	methylheptan-3-one 5-	5-methylheptan-3-one	C8H16O	128.12	128.215	3			1									1														1
ketones	624-42-0	Methylheptan-3-one 6-	6-Methylheptan-3-one	C8H16O	128.12	128.215	1
ketones	626-33-5	Methylheptan-4-one 2-	2-Methylheptan-4-one	C8H16O	128.12	128.215	1																																						1
ketones	2550-21-2	Methylhexan-2-one 3-	3-Methylhexan-2-one	C7H14O	114.105	114.188	1						1
ketones	110-12-3	methyl-hexan-2-one 5-	5-methylhexan-2-one	C7H14O	114.105	114.188	2			1																																							1
ketones	17042-16-9	Methylhexan-3-one 4-	4-Methylhexan-3-one	C7H14O	114.105	114.188	2												1					1
ketones	623-56-3	Methylhexan-3-one 5-	5-Methylhexan-3-one	C7H14O	114.105	114.188	2												1					1
ketones	5408-57-1	Methyloctan-3-one 7-	7-Methyloctan-3-one	C9H18O	142.136	142.242	1																																						1
ketones	141-79-7	methylpent-3-en-2-one 4- / isobutenyl methyl ketone	4-methylpent-3-en-2-one / isobutenyl methyl ketone	C6H10O	98.0732	98.145	3									1																																	1
ketones	108-10-1	methylpentan-2-one 4- / methyl isobutyl ketone / isopropylacetone	4-methylpentan-2-one / methyl isobutyl ketone / isopropylacetone	C6H12O	100.089	100.161	6									1		1	1					1																									1
ketones	565-69-5	Methylpentan-3-one 2-	2-Methylpentan-3-one	C6H12O	100.089	100.161	1
ketones	541-91-3	muscone / 3-Methylcyclopentadecanone	muscone / 3-Methylcyclopentadecanone	C16H30O	238.23	238.415	1																																			1
ketones	629-66-3	Nonadecan-2-one	Nonadecan-2-one	C19H38O	282.292	282.512	3																					1
ketones	na	Nonadecen-2-one (Z)-12-	(Z)-12-Nonadecen-2-one	C19H36O	280.277	280.496	1
ketones	na	Nonadecen-2-one (Z)-8-	(Z)-8-Nonadecen-2-one	C19H36O	280.277	280.496	1
ketones	925-78-0	Nonan-3-one	Nonan-3-one	C9H18O	142.136	142.242	2												1
ketones	4485-09-0	Nonan-4-one	Nonan-4-one	C9H18O	142.136	142.242	7												1		1	1
ketones	821-55-6	nonanone 2-	2-nonanone / nonan-2-one	C9H18O	142.136	142.242	14			1									1		1	1										1																	1
ketones	14309-57-0	Nonen-2-one (E)-3-	(E)-3-Nonen-2-one	C9H16O	140.12	140.226	1
ketones	56889-98-6	Nonen-2-one (Z)-6-	(Z)-6-Nonen-2-one	C9H16O	140.12	140.226	1		1
ketones	14309-57-0	Nonen-2-one 3-	3-Nonen-2-one	C9H16O	140.12	140.226	2
ketones	127-41-3 ui	nor-ionone	nor-ionone	C13H20O	192.151	192.302	3									1																			1														1
ketones	7373-13-9	Octadecan-2-one	Octadecan-2-one	C18H36O	268.277	268.485	1
ketones	na	Octadecen-2-one (Z)-8-	(Z)-8-Octadecen-2-one	C18H34O	266.261	266.469	1
ketones	589-63-9	Octan-4-one	Octan-4-one	C8H16O	128.12	128.215	1												1
ketones	111-13-7	octanone 2-	2-octanone / octan-2-one	C8H16O	128.12	128.215	12			1							1				1	1										1																	1
ketones	106-68-3	octanone 3-	3-octanone / octan-3-one	C8H16O	128.12	128.215	7			1						1		1			1	1																											1
ketones	1669-44-9	Octen-2-one 3-	3-Octen-2-one	C8H14O	126.105	126.199	1
ketones	3664-60-6	Octen-2-one 7-	7-Octen-2-one	C8H14O	126.105	126.199	2														1	1
ketones	na	Oxacyclo-8-decen-2-one	Oxacyclo-8-decen-2-one	C9H14O2	154.099	154.209	1
ketones	2345-28-0	Pentadecan-2-one	Pentadecan-2-one	C15H30O	226.23	226.404	7								1													1
ketones	600-14-6	pentanedione 2,3-	2,3-pentanedione	C5H8O2	100.052	100.117	2																																										1
ketones	107-87-9	pentanone 2- / methyl propyl ketone	2-pentanone / methyl propyl ketone	C5H10O	86.0732	86.134	12									1		1			1	1																											1
ketones	96-22-0	pentanone 3-	3-pentanone / pentan-3-one	C5H10O	86.0732	86.134	10	1											1					1																									1
ketones	625-33-2	Penten-2-one 3-	3-Penten-2-one	C5H8O	84.0575	84.118	1
ketones	1629-58-9	penten-3-one 1-	1-penten-3-one	C5H8O	84.0575	84.118	2																																										1
ketones	122-57-6	Phenyl-3-buten-2-one 4-	4-Phenyl-3-buten-2-one	C10H10O	146.073	146.189	1
ketones	103-79-7	Phenylpropan-2-one 1-	1-Phenylpropan-2-one	C9H10O	134.073	134.178	5												1
ketones	2345-27-9	Tetradecan-2-one	Tetradecan-2-one	C14H28O	212.214	212.377	1								1
ketones	7320-54-9	Tricosan-2-one	Tricosan-2-one	C23H46O	338.355	338.62	1
ketones	593-08-8	Tridecan-2-one	Tridecan-2-one	C13H26O	198.198	198.35	2								1
ketones	462-18-0	Tridecan-7-one	Tridecan-7-one	C13H26O	198.198	198.35	1
ketones	na	Tridecen-2-one (Z)-7-	(Z)-7-Tridecen-2-one	C13H24O	196.183	196.334	2														1	1
ketones	1195-79-5	Trimethylbicyclo[2.2.1]heptan-2-one 1,3,3- / fenchone	1,3,3-Trimethylbicyclo[2.2.1]heptan-2-one / fenchone	C10H16O	152.12	152.237	1
ketones	91811-30-2	Trimethyl-2-decanone 3,5,7-	3,5,7-Trimethyldecan-2-one	C12H24O	184.183	184.323	1
ketones	na	Trimethyl-2-nonanone 3,5,7-	3,5,7-Trimethylnonan-2-one	C12H24O	184.183	184.323	1
ketones	2216-87-7	Undecan-3-one	Undecan-3-one	C11H22O	170.167	170.296	1												1
ketones	14476-37-0	Undecan-4-one	Undecan-4-one	C11H22O	170.167	170.296	1
ketones	7018-92-0	Undecane-2,5-dione	Undecane-2,5-dione	C11H20O2	184.146	184.279	2														1	1
ketones	112-12-9	undecanone 2-	2-undecanone	C11H22O	170.167	170.296	9									1					1	1										1																	1
ketones	na	Undecen-2-one (Z)-5-	(Z)-5-Undecen-2-one	C11H20O	168.151	168.28	2														1	1
ketones	na	Undecen-2-one (Z)-7-	(Z)-7-Undecen-2-one	C11H20O	168.151	168.28	2														1	1
Nitrogen-containing	1373211-33-6	(2-Methylbutyl)-hydroxylamine o-	o-(2-Methylbutyl)hydroxylamine	C5H13NO	103.1	103.165	1
Nitrogen-containing	na	(3-Furyl)-8-methyl-octahydroindolizine 5-	5-(3-Furyl)-8-methyl-octahydroindolizine	C13H19NO	205.147	205.301	1
Nitrogen-containing	56367-27-2	(sec-Butyl)-4,5-dihydrothiazole 2-	2-(sec-Butyl)-4,5-dihydrothiazole	C7H13NS	143.077	143.248	1
Nitrogen-containing	‎56367-27-2	(sec-Butyl)-dihydrothiazole (S)-2-	(S)-2-(sec-Butyl)dihydrothiazole	C7H13NS	143.077	143.248	1
Nitrogen-containing	na	2-Heptylpyridine	2-Heptylpyridine	C12H19N	177.152	177.291	2														1	1
Nitrogen-containing	60-35-5	acetamide / ethanamide / methanecarboxamide	acetamide / ethanamide / methanecarboxamide	C2H5NO	59.0371	59.068	7																																										1
Nitrogen-containing	95598-28-0	Acetamido-5-acetylfuran 3-	3-Acetamido-5-acetylfuran	C8H9NO3	167.058	167.164	4
Nitrogen-containing	59445-85-1	Acetamidofuran 3-	3-Acetamidofuran	C6H7NO2	125.048	125.127	4
Nitrogen-containing	75-05-8	acetonitrile	acetonitrile	C2H3N	41.0265	41.053	3																																										1
Nitrogen-containing	85213-22-5	Acetyl-1-pyrroline 2-	2-Acetyl-1-pyrroline	C6H9NO	111.068	111.144	2
Nitrogen-containing	2466-76-4	Acetylimidazole 1-	1-Acetylimidazole	C5H6N2O	110.048	110.116	1
Nitrogen-containing	613-89-8	Aminoacetophenone 2-	2-Aminoacetophenone	C8H9NO	135.068	135.166	2
Nitrogen-containing	551-93-9	Aminoacetophenone o-	ortho-Aminoacetophenone	C8H9NO	135.068	135.166	2
Nitrogen-containing	61-82-5	Amitrol	Amitrol	C2H4N4	84.0436	84.082	1
Nitrogen-containing	7664-41-7	ammonia	ammonia	H3N	17.0265	17.031	5									1																																	1
Nitrogen-containing	27126-22-3	Azidoheptane 4-	4-Azidoheptane	C7H15N3	141.127	141.218	1
Nitrogen-containing	100-47-0	Benzonitrile	Benzonitrile	C7H5N	103.042	103.124	1
Nitrogen-containing	36578-01-5	Benzoyl L-isoleucine N-	N-Benzoyl L-isoleucine	C13H17NO3	235.121	235.283	1
Nitrogen-containing	120-40-1	bis(2-Hydroxyethyl)-dodecanamide N,N-	N,N-bis(2-Hydroxyethyl)-dodecanamide	C16H33NO3	287.246	287.444	1										1
Nitrogen-containing	541-35-5	Butanamide	Butanamide	C4H9NO	87.0684	87.122	1
Nitrogen-containing	109-73-9	Butanamine 1- / butylamine	1-Butanamine / butylamine	C4H11N	73.0891	73.139	1
Nitrogen-containing	13952-84-6	butanamine 2- / 2-aminobutane	2-butanamine / 2-aminobutane	C4H11N	73.0891	73.139	1																												1
Nitrogen-containing	111-92-2	butyl-1-butanamine N- / N-dibutylamine	N-butyl-1-butanamine / N-dibutylamine	C8H19N	129.152	129.247	1
Nitrogen-containing	6874-86-8	Castoramine (S)-	(S)-Castoramine	C15H23NO2	249.173	249.354	1
Nitrogen-containing	594-71-8	chloro-2-nitropropane 2-	2-chloro-2-nitropropane	C3H6ClNO2	123.009	126.536	3
Nitrogen-containing	na	chloro-4-(4-methoxyphenyl)-6-(4-nitrophenyl)pyrimidine 2-	2-chloro-4-(4-methoxyphenyl)-6-(4-nitrophenyl)pyrimidine	C17H12ClN3O3	341.057	341.751	1			1
Nitrogen-containing	6340-55-2	chloro-6-methoxy-4-methylquinoline 2-	2-chloro-6-methoxy-4-methylquinoline	C11H10ClNO	207.045	207.657	1			1
Nitrogen-containing	25235-85-2	chloroindole 4-	4-chloroindole	C8H6ClN	151.019	151.593	1
Nitrogen-containing	1498-82-4	chlorophenyl)-2,6-diphenylpyridine 4-(4-	4-(4-chlorophenyl)-2,6-diphenylpyridine	C23H16ClN	341.097	341.838	1			1
Nitrogen-containing	627-77-0	citrulline	citrulline	C6H13N3O3	175.096	175.188	1									1
Nitrogen-containing	100-45-8	cyanocyclohexene 4-	4-cyanocyclohexene	C7H9N	107.073	107.156	3			1																																							1
Nitrogen-containing	108-80-5	cyanuric acid / Trihydroxy-1,3,5-triazine 2,4,6-	2,4,6-Trihydroxy-1,3,5-triazine / cyanuric acid	C3H3N3O3	129.017	129.075	1
Nitrogen-containing	na	Demethyldesoxynupharidin (-)-7-	(-)-7-Demethyldesoxynupharidin	C14H21NO	219.162	219.328	1
Nitrogen-containing	1143-54-0	Deoxynupharidine (-)-	(-)-Deoxynupharidine	C15H23NO	233.178	233.355	1
Nitrogen-containing	na	Desoxynupharidin (S)-1-epi,7-epi-	(S)-1-epi,7-epi-Desoxynupharidin	C15H23NO	233.178	233.355	1
Nitrogen-containing	na	Desoxynupliaridin (-)-7-epi-	(-)-7-epi-Desoxynupliaridin	C15H23NO	233.178	233.355	1
Nitrogen-containing	na	Desoxynupliaridin (S)-1-epi-	(S)-1-epi-Desoxynupliaridin	C15H23NO	233.178	233.355	1
Nitrogen-containing	110-60-1	Diaminobutane 1,4- / putrescine	1,4-Diaminobutane / putrescine	C4H12N2	88.1	88.154	3
Nitrogen-containing	462-94-2	Diaminopentane 1,5- / cadaverine	1,5-Diaminopentane / cadaverine	C5H14N2	102.116	102.181	3																																										1
Nitrogen-containing	761-65-9	dibutyl-formamide N,N- / dibutylformamide	N,N-dibutyl-formamide / dibutylformamide	C9H19NO	157.147	157.257	2																																										1
Nitrogen-containing	109-89-7	diethylamine	diethylamine	C4H11N	73.0891	73.139	1									1
Nitrogen-containing	59-48-3	Dihydro-2H-indol-2-one 1,3- / oxindole	1,3-Dihydro-2H-indol-2-one / oxindole	C8H7NO	133.053	133.15	1
Nitrogen-containing	108-18-9	diisopropylamine / N-isopropyl-1-amino-2-methylethane	diisopropylamine / N-isopropyl-1-amino-2-methylethane	C6H15N	101.12	101.193	1
Nitrogen-containing	13360-65-1	Dimethyl-3-ethylpyrazine 2,5-	2,5-Dimethyl-3-ethylpyrazine	C8H12N2	136.1	136.198	1
Nitrogen-containing	18433-97-1	Dimethyl-3-propylpyrazine 2,5-	2,5-Dimethyl-3-propylpyrazine	C9H14N2	150.116	150.225	1
Nitrogen-containing	na	Dimethyl-5,6,7,8-tetrahydroquinoxaline 2,3-	2,3-Dimethyl-5,6,7,8-tetrahydroquinoxaline	C10H14N2	162.116	162.236	1
Nitrogen-containing	127-19-5	dimethylacetamide N,N-	N,N-dimethylacetamide	C4H9NO	87.0684	87.122	1
Nitrogen-containing	124-40-3	dimethylamine	dimethylamine	C2H7N	45.0578	45.085	4																																										1
Nitrogen-containing	95-68-1	Dimethylbenzenamine 2,4- / 2,4-xylidine	2,4-Dimethylbenzenamine / 2,4-xylidine	C8H11N	121.089	121.183	1												1
Nitrogen-containing	20662-83-3	dimethyloxazole 4,5-	4,5-dimethyloxazole	C5H7NO	97.0528	97.117	1
Nitrogen-containing	24451-17-0	dimethylphenyl]-2-amino-2-oxo-acetic acid N-[3,4-, ethyl ester	N-[3,4-dimethylphenyl]-2-amino-2-oxo-acetic acid, ethyl ester	C12H15NO3	221.105	221.256	1			1
Nitrogen-containing	5910-89-4	Dimethylpyrazine 2,3-	2,3-Dimethylpyrazine	C6H8N2	108.069	108.144	1
Nitrogen-containing	123-32-0	dimethylpyrazine 2,5-	2,5-dimethylpyrazine	C6H8N2	108.069	108.144	11																																										1
Nitrogen-containing	108-50-9	Dimethylpyrazine 2,6-	2,6-Dimethylpyrazine	C6H8N2	108.069	108.144	3
Nitrogen-containing	108-48-5	Dimethylpyridine 2,6-	2,6-Dimethylpyridine	C7H9N	107.073	107.156	4
Nitrogen-containing	703-63-9	Dimethylquinazoline 2,4-	2,4-Dimethylquinazoline	C10H10N2	158.084	158.204	1
Nitrogen-containing	96-31-1	Dimethylurea N,N-	N,N-Dimethylurea	C3H8N2O	88.0637	88.11	2
Nitrogen-containing	927-83-3	di-tert-Butyldiazene (E)-1,2-	(E)-1,2-di-tert-Butyldiazene	C8H18N2	142.147	142.246	1							1
Nitrogen-containing	107-15-3	Ethanediamine 1,2-	1,2-Ethanediamine	C2H8N2	60.0687	60.1	1
Nitrogen-containing	88-12-0	ethenyl-2-pyrrolidinone 1- / N-vinylpyrrolidone	1-ethenyl-2-pyrrolidinone / N-vinylpyrrolidone	C6H9NO	111.068	111.144	1									1
Nitrogen-containing	627-48-5	ethyl cyanate / cyanic acid, ethyl ester	ethyl cyanate / cyanic acid, ethyl ester	C3H5NO	71.0371	71.079	1									1
Nitrogen-containing	617-92-5	ethyl-1H-pyrrole 1-	1-ethyl-1H-pyrrole	C6H9N	95.0735	95.145	2									1																																	1
Nitrogen-containing	15707-23-0	Ethyl-3-methylpyrazine 2-	2-Ethyl-3-methylpyrazine	C7H10N2	122.084	122.171	2																													1
Nitrogen-containing	13360-64-0	Ethyl-6(5)-methylpyrazine 2-	2-Ethyl-6(5)-methylpyrazine ui	C7H10N2	122.084	122.171	1
Nitrogen-containing	13925-00-3	Ethylpyrazine 2-	2-Ethylpyrazine	C6H8N2	108.069	108.144	1
Nitrogen-containing	75-12-7	Formamide	Formamide	CH3NO	45.0215	45.041	2
Nitrogen-containing	14191-95-8	Hydroxybenzyl cyanide p-	p-Hydroxybenzyl cyanide	C8H7NO	133.053	133.15	1
Nitrogen-containing	288-32-4	imidazole	imidazole	C3H4N2	68.0374	68.079	1
Nitrogen-containing	120-72-9	indole	1H-indole / 2,3-Benzopyrrole	C8H7N	117.058	117.151	30			1						1																	1		1											1			1
Nitrogen-containing	13220-57-0	Indolo-[2,1-b]quinazoline-6,12-dione / tryptanthrine	Indolo-[2,1-b]quinazoline-6,12-dione / tryptanthrine	C15H8N2O2	248.059	248.241	1	1
Nitrogen-containing	na	Isobutyl-4,5-dihydrothiazole 2-	2-Isobutyl-4,5-dihydrothiazole	C7H13NS	143.077	143.248	2													1								1
Nitrogen-containing	18640-74-9	Isobutylthiazole 2-	2-Isobutylthiazole	C7H11NS	141.061	141.232	2													1								1
Nitrogen-containing	na	Isocastoramine (S)-	(S)-Isocastoramine	C15H23NO2	249.173	249.354	1
Nitrogen-containing	19411-65-5	isopentylhydroxylamine o-	o-isopentylhydroxylamine	C5H13NO	103.1	103.165	4
Nitrogen-containing	na	Isopropyl-4,5-dihydrothiazole 2-	2-Isopropyl-4,5-dihydrothiazole	C6H11NS	129.061	129.221	1
Nitrogen-containing	2475-92-5	methoxyphenyl oxime	methoxyphenyl oxime	C8H9NO2	151.063	151.165	3			1						1																																	1
Nitrogen-containing	‎598-58-3	methyl nitrate	methyl nitrate	CH3NO3	77.0113	77.039	1									1
Nitrogen-containing	96-54-8	methyl-1H-pyrrole 1-	1-methyl-1H-pyrrole	C5H7N	81.0578	81.118	2									1																																	1
Nitrogen-containing	636-41-9	methyl-1H-pyrrole 2- / 2-methyl-pyrrole	2-methyl-1H-pyrrole / 2-methyl-pyrrole	C5H7N	81.0578	81.118	2																																										1
Nitrogen-containing	625-74-1	methyl-1-nitropropane 2-	2-methyl-1-nitropropane	C4H9NO2	103.063	103.121	3
Nitrogen-containing	119-33-5	methyl-2-nitrophenol 4-	4-methyl-2-nitrophenol	C7H7NO3	153.043	153.137	1									1
Nitrogen-containing	3558-24-5	methyl-2-phenyl-1H-indole 1-	1-methyl-2-phenyl-1H-indole	C15H13N	207.105	207.276	1			1
Nitrogen-containing	na	methyl-2-phenyl-7-(2,4,5-trimethylphenylmethyl)indolizine 6-	6-methyl-2-phenyl-7-(2,4,5-trimethylphenylmethyl)indolizine	C25H25N	339.199	339.482	1			1
Nitrogen-containing	872-50-4	methyl-2-pyrrolidinone 1- / N-methylpyrrolidione	1-methyl-2-pyrrolidinone / N-methylpyrrolidione	C5H9NO	99.0684	99.133	2
Nitrogen-containing	5519-50-6	methyl-3-piperidinone 1-	1-methyl-3-piperidinone	C6H11NO	113.084	113.16	1									1
Nitrogen-containing	38917-65-6	Methyl-5,6,7,8-tetrahydroquinoxaline 2-	2-Methyl-5,6,7,8-tetrahydroquinoxaline	C9H12N2	148.1	148.209	1
Nitrogen-containing	55138-67-5	Methyl-6-(1-propenyl)-pyrazine (Z)-2-	(Z)-2-Methyl-6-(1-propenyl)-pyrazine	C8H10N2	134.084	134.182	1
Nitrogen-containing	13925-09-2	Methyl-6-vinylpyrazine 2-	2-Methyl-6-vinylpyrazine	C7H8N2	120.069	120.155	2
Nitrogen-containing	74-89-5	methylamine	methylamine	CH5N	31.0422	31.058	4																																										1
Nitrogen-containing	100-61-8	Methylbenzenamine N- / methylaniline	N-Methylbenzenamine / methylaniline	C7H9N	107.073	107.156	2
Nitrogen-containing	541-46-8	Methylbutanamide 3-	3-Methylbutanamide	C5H11NO	101.084	101.149	1
Nitrogen-containing	1572-52-7	Methylenepentanedinitrile 2-	2-Methylenepentanedinitrile	C6H6N2	106.053	106.128	1
Nitrogen-containing	616-04-6	Methylhydantoin 1- / 1-Methyl-2,4-imidazolidinedione	1-Methylhydantoin / 1-Methyl-2,4-imidazolidinedione	C4H6N2O2	114.043	114.104	3
Nitrogen-containing	616-03-5	Methylhydantoin 5- / 5-Methyl-2,4-imidazolidinedione	5-Methylhydantoin / 5-Methyl-2,4-imidazolidinedione	C4H6N2O2	114.043	114.104	3
Nitrogen-containing	17167-73-6	methylhydrazone acetaldehyde	methylhydrazone acetaldehyde	C3H6N2O	86.048	86.094	1
Nitrogen-containing	39021-62-0	Methylimidazole-5-carboxaldehyde 1-	1-Methylimidazole-5-carboxaldehyde	C5H6N2O	110.048	110.116	1
Nitrogen-containing	83-34-1	methylindole 3- / skatole	3-methylindole / skatole	C9H9N	131.073	131.178	8			1	1					1																	1		1											1			1
Nitrogen-containing	1611-83-2	Methyl-N-phenylacrylamide 2-	2-Methyl-N-phenylacrylamide	C10H11NO	161.084	161.204	1										1
Nitrogen-containing	626-67-5	Methylpiperidine 1-	1-Methylpiperidine	C6H13N	99.1048	99.177	2
Nitrogen-containing	78-81-9	Methylpropylamine 2-	2-Methylpropylamine	C4H11N	73.0891	73.139	1
Nitrogen-containing	109-08-0	Methylpyrazine 2-	2-Methylpyrazine	C5H6N2	94.0531	94.117	3
Nitrogen-containing	109-06-8	methylpyridine 2- / 2-picoline	2-methylpyridine / 2-picoline	C6H7N	93.0578	93.129	2									1																																	1
Nitrogen-containing	5615-90-7	Methylpyrrolidine-2,5-dione 3- / methylsuccinimide	3-Methylpyrrolidine-2,5-dione / methylsuccinimide	C5H7NO2	113.048	113.116	1
Nitrogen-containing	700-46-9	Methylquinazoline 4-	4-Methylquinazoline	C9H8N2	144.069	144.177	2
Nitrogen-containing	91-63-4	Methylquinoline 2-	2-Methylquinoline	C10H9N	143.073	143.189	6
Nitrogen-containing	625-58-1	nitric acid, ethyl ester	nitric acid, ethyl ester	C2H5NO3	91.0269	91.066	2									1																																	1
Nitrogen-containing	6764-10-9	nitro-4'-chlorodiphenylsulfoxide 4-	4-nitro-4'-chlorodiphenylsulfoxide	C12H8ClNO3S	280.991	281.71	1			1
Nitrogen-containing	628-05-7	Nitropentane 1-	1-Nitropentane	C5H11NO2	117.079	117.148	1
Nitrogen-containing	7119-94-0	Nitropiperidine 1-	1-Nitropiperidine	C5H10N2O2	130.074	130.147	1
Nitrogen-containing	1120-07-6	Nonanamide	Nonanamide	C9H19NO	157.147	157.257	1
Nitrogen-containing	124-26-5	Octadecanamide	Octadecanamide	C18H37NO	283.288	283.5	1
Nitrogen-containing	63493-28-7	pentanamine 2- / 2-aminopentane	2-pentanamine / 2-aminopentane	C5H13N	87.1048	87.166	1																												1
Nitrogen-containing	5963-74-6	Pentylhydroxylamine o-	o-Pentylhydroxylamine	C5H13NO	103.1	103.165	1
Nitrogen-containing	103-70-8	Phenyl formamide N-	N-Phenyl formamide	C7H7NO	121.053	121.139	2
Nitrogen-containing	na	phenyl-4-(2-cyano-2-phenylethenyl)benzene 1-	1-phenyl-4-(2-cyano-2-phenylethenyl)benzene	C21H15N	281.12	281.358	1			1
Nitrogen-containing	103-81-1	Phenylacetamide 2-	2-Phenylacetamide	C8H9NO	135.068	135.166	1
Nitrogen-containing	140-29-4	Phenylacetonitrile 2-	2-Phenylacetonitrile	C8H7N	117.058	117.151	6																					1
Nitrogen-containing	64-04-0	Phenylethylamine 2-	2-Phenylethylamine	C8H11N	121.089	121.183	4
Nitrogen-containing	92-54-6	Phenylpiperazine 1-	1-Phenylpiperazine	C10H14N2	162.116	162.236	1							1
Nitrogen-containing	675-20-7	piperidinone 2-	2-piperidinone / piperidin-2-one / 2-piperidone	C5H9NO	99.0684	99.133	11										1																																1
Nitrogen-containing	4006-50-2	Polycartine B / Octahydrophenazine 1,2,3,4,6,7,8,9-	1,2,3,4,6,7,8,9-Octahydrophenazine / Polycartine B	C12H16N2	188.131	188.274	1
Nitrogen-containing	79-05-0	Propanamide	Propanamide	C3H7NO	73.0528	73.095	1
Nitrogen-containing	107-10-8	Propylamine	Propylamine	C3H9N	59.0735	59.112	2
Nitrogen-containing	290-37-9	Pyrazine	Pyrazine	C4H4N2	80.0374	80.09	1
Nitrogen-containing	110-86-1	Pyridine	Pyridine	C5H5N	79.0422	79.102	1
Nitrogen-containing	109-97-7	pyrrole	pyrrole	C4H5N	67.0422	67.091	4																																										1
Nitrogen-containing	616-45-5	Pyrrolidin-2-one / 2-Pyrrolidinone	Pyrrolidin-2-one / 2-Pyrrolidinone	C4H7NO	85.0528	85.106	3
Nitrogen-containing	‎253-82-7	Quinazoline	Quinazoline	C8H6N2	130.053	130.15	1
Nitrogen-containing	91-22-5	Quinoline	Quinoline	C9H7N	129.058	129.162	6
Nitrogen-containing	1780-17-2	Quinolinemethanethiol 2-	2-Quinolinemethanethiol	C10H9NS	175.046	175.249	4
Nitrogen-containing	34413-35-9	Tetrahydroquinoxaline 5,6,7,8-	5,6,7,8-Tetrahydroquinoxaline	C8H10N2	134.084	134.182	1
Nitrogen-containing	na	Tetramethyl-5,6,7,8-tetrahydroisochinolin-8-one 1,3,6,6-	1,3,6,6-Tetramethyl-5,6,7,8-tetrahydroisochinolin-8-one	C13H17NO	203.131	203.285	1
Nitrogen-containing	1124-11-4	Tetramethylpyrazine 2,3,5,6-	2,3,5,6-Tetramethylpyrazine	C8H12N2	136.1	136.198	2
Nitrogen-containing	na	Triazone-2,4-diamine 1,3,5- &	1,3,5-Triazone-2,4-diamine - missnamed	C9H16N5O2S	258.103	258.32	1
Nitrogen-containing	121-44-8	triethylamine	triethylamine	C6H15N	101.12	101.193	3									1
Nitrogen-containing	14667-55-1	trimethyl pyrazine 2,3,5- / trimethylpyrazine	2,3,5-trimethyl pyrazine / trimethylpyrazine	C7H10N2	122.084	122.171	7																																										1
Nitrogen-containing	75-50-3	trimethylamine	trimethylamine	C3H9N	59.0735	59.112	9									1
Nitrogen-containing	57-13-6	Urea	Urea	CH4N2O	60.0324	60.056	2
other	124-38-9	Carbon dioxide	Carbon dioxide	CO2	43.9898	44.009	1
peroxide	14018-58-7	methylbutyl hydroperoxide 1- / 2-hydroperoxypentane	1-methylbutyl hydroperoxide / 2-hydroperoxypentane	C5H12O2	104.084	104.149	1
phenols	501-94-0	(2-Hydroxyethyl)-phenol 4-	4-(2-Hydroxyethyl)-phenol	C8H10O2	138.068	138.166	1
phenols	97-53-0	Allyl-2-methoxyphenol 4- / eugenol	4-Allyl-2-methoxyphenol / eugenol	C10H12O2	164.084	164.204	1
phenols	108-73-6	Benzenetriol 1,3,5-	1,3,5-Benzenetriol	C6H6O3	126.032	126.111	1
phenols	14035-34-8	bis(1,1-dimethylethyl)-4-(1-oxopropyl)phenol 2,6-	2,6-bis(1,1-dimethylethyl)-4-(1-oxopropyl)phenol	C17H26O2	262.193	262.393	2			1																																							1
phenols	128-37-0	di-t-Butyl-4-methylphenol 2,6-	2,6-di-t-Butyl-4-methylphenol	C15H24O	220.183	220.356	1
phenols	1020-31-1	di-tert-butylbenzene-1,2-diol 3,5-	3,5-di-tert-butylbenzene-1,2-diol	C14H22O2	222.162	222.328	2			1																																							1
phenols	ui	ethylphenol (ui)	Ethylphenol (ui)	C8H10O	122.073	122.167	1			1
phenols	620-17-7	ethylphenol 3-	3-ethylphenol	C8H10O	122.073	122.167	4									1					1	1								1
phenols	123-07-9	ethylphenol 4-	4-ethylphenol	C8H10O	122.073	122.167	7		1							1														1
phenols	90-01-7	Hydroxybenzalcohol o-	o-Hydroxybenzalcohol	C7H8O2	124.052	124.139	1
phenols	499-75-2	isopropyl-6-methylphenol 3-	3-isopropyl-6-methylphenol / carvacrol	C10H14O	150.105	150.221	3																									1																	1
phenols	80-05-7	isopropylidenediphenol 4,4'-	4,4'-isopropylidenediphenol	C15H16O2	228.115	228.291	1			1
phenols	90-05-1	methoxyphenol 2- / o-methoxyphenol	2-methoxyphenol / o-methoxyphenol	C7H8O2	124.052	124.139	7			1						1														1		1															1		1
phenols	504-15-4	Methylbenzene-1,3-diol 5- / orcinol	5-Methylbenzene-1,3-diol / orcinol	C7H8O2	124.052	124.139	1
phenols	452-86-8	Methylcatechol 4-	4-Methylcatechol	C7H8O2	124.052	124.139	1
phenols	95-48-7	methylphenol 2- / o-cresol	2-methylphenol / o-cresol	C7H8O	108.058	108.14	2									1
phenols	108-39-4	methylphenol 3- / m-cresol	3-methylphenol / m-cresol	C7H8O	108.058	108.14	13		1	1	1					1		1			1	1								1		1		1						1									1
phenols	106-44-5	methylphenol 4- / p-cresol	4-methylphenol / p-cresol	C7H8O	108.058	108.14	24		1	1	1					1	1													1		1	1	1	1				1							1			1
phenols	108-95-2	phenol	phenol	C6H6O	94.0419	94.113	29		1	1						1																			1					1									1
phenols	621-27-2	propylphenol 3-n-	3-propylphenol	C9H12O	136.089	136.194	8			1						1	1				1	1								1		1	1
phenols	645-56-7	propylphenol 4-n-	4-propylphenol	C9H12O	136.089	136.194	4									1														1		1
phenols	59-02-9	Tocopherol α- / vitamin E	α-Tocopherol / vitamin E	C29H50O2	430.381	430.717	2
Phosphorous-containing	3466-00-0	Phospholane	Phospholane	C4H9P	88.0442	88.0898	1
Phosphorous-containing	676-97-1	methylphosphonic dichloride	methylphosphonic dichloride	CH3Cl2OP	132.93	132.908	1									1
siloxane	541-05-9	hexamethylcyclotrisiloxane	hexamethylcyclotrisiloxane	C6H18O3Si3	222.056	222.462	1
siloxane	556-67-2	octamethylcyclotetrasiloxane	octamethylcyclotetrasiloxane	C8H24O4Si4	296.075	296.616	1
Sulfur-containing	3622-84-2	Butylbenzenesulfonamide N-	N-Butylbenzenesulfonamide	C10H15NO2S	213.082	213.295	1
Sulfur-containing	2051-04-9	(Isopentyldisulfanyl)-3-methylbutane 1- / isoamyl disulfide	1-(Isopentyldisulfanyl)-3-methylbutane / isoamyl disulfide	C10H22S2	206.116	206.406	2
Sulfur-containing	505-10-2	(Methylthio)-propan-1-ol 3-/ methionol	3-(Methylthio)-propan-1-ol / methionol	C4H10OS	106.045	106.183	1
Sulfur-containing	646-01-5	(Methylthio)propionic acid 3-	3-(Methylthio)propionic acid	C4H8O2S	120.025	120.166	1
Sulfur-containing	3547-33-9	(Octylthio)-ethanol 2-	2-(Octylthio)-ethanol	C10H22OS	190.139	190.345	1
Sulfur-containing	107-35-7	Aminoethanesulfonic acid 2- / taurine	2-Aminoethanesulfonic acid / taurine	C2H7NO3S	125.015	125.142	12				1
Sulfur-containing	100-53-8	Benzenemethanethiol / phenylmethanethiol	Benzenemethanethiol / phenylmethanethiol	C7H8S	124.035	124.201	3
Sulfur-containing	95-16-9	benzothiazole	benzothiazole / benzosulfonazole	C7H5NS	135.014	135.184	7									1																																	1
Sulfur-containing	113960-68-2	bis(3-methylbut-3-enyl) disulfide	bis(3-methylbut-3-enyl) disulfide	C10H18S2	202.085	202.374	1
Sulfur-containing	2051-04-9	bis(3-Methylbutyl)-disulfide	Bis(3-Methylbutyl)disulfide	C10H22S2	206.116	206.406	1
Sulfur-containing	58688-79-2	Butene-1-thiol (E)-2-	(E)-2-Butene-1-thiol	C4H8S	88.0347	88.168	4
Sulfur-containing	na	Butenyl 3-methylbutyl disulfide (E)-2-	(E)-2-Butenyl 3-methylbutyl disulfide	C9H18S2	190.085	190.363	3
Sulfur-containing	na	Butenyl methyldisulfide (E)-2-	(E)-2-Butenyl methyldisulfide	C5H10S2	134.022	134.255	1
Sulfur-containing	na	Butenyl thioacetate S-(E)-2-	S-(E)-2-Butenyl thioacetate	C6H10OS	130.045	130.205	3
Sulfur-containing	628-29-5	butyl methyl sulfide	butyl methyl sulfide	C5H12S	104.066	104.211	2
Sulfur-containing	75-15-0	carbon disulfide / methyl disulfide	carbon disulfide / methyl disulfide	CS2	75.9441	76.131	4									1																			1														1
Sulfur-containing	463-58-1	carbonyl sulfide	carbonyl sulfide	COS	59.967	60.07	4									1																			1														1
Sulfur-containing	83688-99-7	di-but-2-enyl disulfide / bis(E)-2-Butenyl disulfide	di-but-2-enyl disulfide / bis(E)-2-Butenyl disulfide	C8H14S2	174.054	174.32	1
Sulfur-containing	110-81-6	diethyl disulfide / ethyl disulfide	diethyl disulfide / ethyl disulfide	C4H10S2	122.022	122.244	1
Sulfur-containing	352-93-2	diethyl sulfide	diethyl sulfide	C4H10S	90.0503	90.184	2																												1
Sulfur-containing	70-29-1	Diethyl sulfoxide	Diethyl sulfoxide	C4H10OS	106.045	106.183	1																					1
Sulfur-containing	624-92-0	dimethyl disulfide / DMDS	dimethyl disulfide / DMDS	C2H6S2	93.9911	94.19	17									1		1																															1
Sulfur-containing	75-18-3	dimethyl sulfide	dimethyl sulfide	C2H6S	62.019	62.13	4									1		1																															1
Sulfur-containing	67-71-0	dimethyl sulfone	dimethyl sulfone	C2H6O2S	94.0089	94.1289	12								1	1	1																						1										1
Sulfur-containing	67-68-5	dimethyl sulfoxide	dimethyl sulfoxide	C2H6OS	78.0139	78.129	1
Sulfur-containing	3658-80-8	dimethyl trisulfide	dimethyl trisulfide / 1,3-Dimethyltrisulfane	C2H6S3	125.963	126.25	13									1		1															1		1														1
Sulfur-containing	58384-57-9	Dimethyl-1,2-dithiolane 3,3-	3,3-Dimethyl-1,2-dithiolane	C5H10S2	134.022	134.255	6
Sulfur-containing	na	Dimethyl-1,2-dithiolane cis-3,4-	cis-3,4-Dimethyl-1,2-dithiolane	C5H10S2	134.022	134.255	2
Sulfur-containing	na	Dimethyl-1,2-dithiolane trans-3,4-	trans-3,4-Dimethyl-1,2-dithiolane	C5H10S2	134.022	134.255	2
Sulfur-containing	541-58-2	dimethylthiazole 2,4-	2,4-dimethylthiazole	C5H7NS	113.03	113.178	1										1
Sulfur-containing	55022-72-5	Dimethylthietane 2,2- / mustelane	2,2-Dimethylthietane / mustelane	C5H10S	102.05	102.195	7
Sulfur-containing	na	Dimethylthietane 2,3-	2,3-Dimethylthietane (ui)	C5H10S	102.05	102.195	1
Sulfur-containing	43044-24-2	Dimethylthietane 2,4-	2,4-Dimethylthietane	C5H10S	102.05	102.195	3
Sulfur-containing	na	Dimethylthietane cis-2,3-	cis-2,3-Dimethylthietane	C5H10S	102.05	102.195	1
Sulfur-containing	na	Dimethylthietane trans-2,3-	trans-2,3-Dimethylthietane	C5H10S	102.05	102.195	5
Sulfur-containing	632-16-6	dimethylthiophene 2,3-	2,3-dimethylthiophene	C6H8S	112.035	112.19	1									1
Sulfur-containing	111-47-7	dipropyl sulfide	dipropyl sulfide	C6H14S	118.082	118.238	2																												1														1
Sulfur-containing	1618-26-4	Dithiapentane 2,4-	2,4-Dithiapentane	C5H12S2	108.007	108.217	1
Sulfur-containing	6008-51-1	Dithiepane 1,2-	1,2-Dithiepane	C5H10S2	134.022	134.255	2
Sulfur-containing	75-08-1	ethanethiol / ethyl mercaptan	ethanethiol / ethyl mercaptan	C2H6S	62.019	62.13	3																												1														1
Sulfur-containing	na	Ethyl-1,2-dithiolane 3-	3-Ethyl-1,2-dithiolane	C5H10S2	134.022	134.255	3
Sulfur-containing	na	Ethyl-3-methylthietane (E)-2-	(E)-2-Ethyl-3-methylthietane	C6H12S	116.066	116.222	3
Sulfur-containing	na	Ethyl-3-methylthietane (Z)-2-	(Z)-2-Ethyl-3-methylthietane	C6H12S	116.066	116.222	3
Sulfur-containing	na	Ethyl-3-methylthietane 2- (ui)	2-Ethyl-3-methylthietane (ui)	C6H12S	116.066	116.222	1
Sulfur-containing	624-89-5	ethylmethylsulfide	ethylmethylsulfide	C6H14S	118.082	118.238	2																												1														1
Sulfur-containing	na	Ethylthietane 2-	2-Ethylthietane	C5H10S	102.05	102.195	6
Sulfur-containing	872-55-9 / 1795-01-3	ethylthiophene 2- or 3-	2- or 3-Ethylthiophene	C6H8S	112.035	112.19	1									1
Sulfur-containing	13798-23-7	Hexathiane	Hexathiane	S6	191.832	192.36	1
Sulfur-containing	7783-06-4	hydrogen sulfide	hydrogen sulfide	H2S	33.9877	34.076	3																																										1
Sulfur-containing	13286-90-3	isopentyl(methyl)sulfane / methyl 3-methylbutyl sulfide	isopentyl(methyl)sulfane / methyl 3-methylbutyl sulfide	C6H14S	118.082	118.238	2
Sulfur-containing	na	Isopropylthietane 2-	2-Isopropylthietane	C6H12S	116.066	116.222	1
Sulfur-containing	34300-94-2	Mercapto-3-methylbutan-1-ol 3-	3-Mercapto-3-methylbutan-1-ol	C5H12OS	120.061	120.21	3
Sulfur-containing	74-93-1	methanethiol / methyl mercaptan	methanethiol / methyl mercaptan	CH4S	48.0034	48.103	3																												1														1
Sulfur-containing	na	Methyl (3-methylbut-3-enyl)-sulfane	Methyl(3-methylbut-3-enyl)sulfide	C6H12S	116.066	116.222	1
Sulfur-containing	5952-75-0		2-methyl-4-(methylthio)-1-butene / delta3-Isopentenyl methyl sulfide	C6H12S	116.066	116.222	2
Sulfur-containing	na	Methyl 2-phenylethanethioate S-	S-Methyl 2-phenylethanethioate	C9H10OS	166.045	166.238	1												1
Sulfur-containing	72437-56-0	methyl isopentyl disulfane	methyl isopentyl disulfane	C6H14S2	150.054	150.298	1
Sulfur-containing	1741-83-9	methyl pentyl sulfane / amyl methyl sulfide	methyl pentyl sulfane / amyl methyl sulfide	C6H14S	118.082	118.238	2
Sulfur-containing	541-31-1	Methyl-1-butanethiol 3-	3-Methyl-1-butanethiol	C5H12S	104.066	104.211	4
Sulfur-containing	89534-74-7	Methyl-1-methylthio-2-butene 3-	3-Methyl-1-methylthio-2-butene	C6H12S	116.066	116.222	1
Sulfur-containing	5287-45-6	Methyl-2-butene-1-thiol 3-	3-Methyl-2-butene-1-thiol	C5H10S	102.05	102.195	2
Sulfur-containing	2432-38-4	Methylbutanyl S-3- thioacetate	S-3-Methylbutanyl thioacetate	C7H14OS	146.077	146.248	2
Sulfur-containing	3877-15-4	methylpropylsulfide / 1-(methylthio)-propane	methyl propyl sulfide / 1-(methylthio)-propane	C8H18S	90.0503	90.184	4																												1														1
Sulfur-containing	4740-00-5	Methyltetrahydrothiophene 3-	3-Methyltetrahydrothiophene	C5H10S	102.05	102.195	1
Sulfur-containing	17837-41-1	Methylthietane 2-	2-Methylthietane	C4H8S	88.0347	88.168	1
Sulfur-containing	4886-77-5	methylthioanisole	methylthioanisole	C8H10S	138.05	138.228	1																												1
Sulfur-containing	616-44-4	methylthiophene 3-	3-methylthiophene	C5H6S	98.019	98.163	1									1
Sulfur-containing	10147-41-8	octadecane sulfonyl chloride 1- / octadecane-1-sulphonyl chloride	1-octadecane sulfonyl chloride / octadecane-1-sulphonyl chloride	C18H37ClO2S	352.22	353.002	1
Sulfur-containing	10544-50-0	Octathiocane	Octathiocane	S8	255.777	256.48	3
Sulfur-containing	na	Pentane-1,3-dithiol	Pentane-1,3-dithiol	C5H12S2	136.038	136.271	1
Sulfur-containing	110-66-7	Pentanethiol	Pentanethiol	C5H12S	104.066	104.211	1
Sulfur-containing	na	Pentylthietane 2-	2-Pentylthietane	C8H16S	144.097	144.276	2
Sulfur-containing	4410-99-5	Phenylethanethiol 2-	2-Phenylethanethiol	C8H10S	138.05	138.228	2
Sulfur-containing	5925-63-3	Phenylethyl methyl sulfane 2-	2-Phenylethyl methyl sulfane	C9H12S	152.066	152.255	1
Sulfur-containing	na	Phenylethyl thioacetate S-2-	S-2-Phenylethyl thioacetate	C10H12OS	180.061	180.265	1
Sulfur-containing	107-03-9	propanethiol 1- / propyl mercaptan	1-propanethiol / propyl mercaptan	C3H8S	76.0347	76.157	3											1																															1
Sulfur-containing	75-33-2	propanethiol 2- / isopropyl mercaptan	2-propanethiol / isopropyl mercaptan	C3H8S	76.0347	76.157	1																												1
Sulfur-containing	70678-50-1	Propyl-1,2-dithiolane 3-	3-Propyl-1,2-dithiolane	C6H12S2	148.038	148.282	2
Sulfur-containing	70678-49-8	Propylthietane 2-	2-Propylthietane	C6H12S	116.066	116.222	4
Sulfur-containing	na	Quinolinemethyl thioacetate S-2-	S-2-Quinolinemethyl thioacetate	C12H11NOS	217.056	217.286	1
Sulfur-containing	7446-09-5	sulfur dioxide	sulfur dioxide	O2S	63.9619	64.058	2																																										1
Sulfur-containing	126-33-0	tetrahydrothiophene 1,1-dioxide / sulfolane	tetrahydrothiophene 1,1-dioxide / sulfolane	C4H8O2S	120.025	120.166	1
Table S1: All 1287 volatile organic compounds reported in the literature from 141 non-human animal species. Water, oxygen, nitrogen, argon and other rare gases are not listed. Refernces are listed on the the next sheet.
na = CAS number not available
ui = unidentified isomer
[truncated: 99 more columns]

## Sheet: References
Order	Family	Species Common name	Scientific name	Number of compounds reported	References
Proboscidea	Elephantidae	Asian elephant	Elaphas maximus	9	[182-188]
		African elephant	Loxodonta africana	24	[189-193]
Perissodactyla	Equidae	Domestic horse	Equus equus	102	[60,143,194-196]
		Wild horse	Equus caballus	14	[197,198]
		Donkey	Equus asinus	7	[199,200]
Artiodactyla	Bovidae	Red hartebeest	Alcelaphus buselaphus caama	50	[201]
		Blackbuck	Antelope cervicapra	19	[59]
		Springbok	Antidorcas marsupialis	20	[202,203]
		Domestic cattle	Bos taurus	232	[36,37,45,59,61-63,75,76,129,130,132,137,171,195,197,199,204-211]
		Asian water buffalo	Bubalus bubalis	30	[48,212]
		Domestic goat	Capra aegagrus hircus	113	[41,42,66,75,81,82,197,199]
		Blue duiker	Cephalophus monticola	44	[213]
		Natal red duiker	Cephalophus natalensis	2	[214]
		Bontebok	Damaliscus dorcas dorcas	58	[215-218]
		Blesbok	Damaliscus dorcas phillipsi	57	[217,218]
		Suni	Neotragus moschatus	17	[219]
		Klipspringer	Oreotragus oreotragus	8	[220]
		Muskox	Ovibos moschatus)	7	[221]
		Oribi	Ourebia ourebi)	37	[222]
		Cape grysbok	Raphicerus melanotis)	29	[223]
		Grey duiker	Sylvicapra grimmia)	17	[214,224]
		Bison	Bison bison	5	[131]
		African buffalo	Syncerus caffer	18	[76,139,225]
		Gaur	Bos guarus	1	[226]
		Waterbuck	Kobus defessa	29	[76,225]
		Sheep	Ovis aries	50	[75,195,199,227,228]
	Suidae	Warthog urine	Phacochoerus aethiopicus	2	[225]
		Domestic pig	Sus scrofa	66	[195,229-231]
	Antilocapridae	Pronghorn antelope	Antilocapra Americana	9	[232,233]
	Camelidae	Bactrian camel	Camelus bactrianus	15	[234]
		Arabian camel	Camelus dromedaries	2	[234]
	Cervidae	Alaskan moose	Alces alces gigas	4	[235]
		West European red deer	Cervus elaphus	6	[236]
		Sika deer	Cervus nippon	39	[237,238]
		Siberian musk deer	Moschus rnoschiferus	1	[239]
		Columbian black-tailed deer	Odocoileus hemionus columbianus	1	[240]
		White-tailed deer	Odocoileus virginianus	17	[241]
		Reindeer	Rangifer tarandus tarandus	23	[242-247]
	Giraffidae	Reticulated giraffe	Giraffa camelopardalis reticulata	11	[248]
	Tayassuidae	White-lipped peccary	Tayassu pecari	30	[249]
		Collared peccary	Tayassu tajacu	17	[250]
Primates	Hominidae	Human	Homo sapiens	336	[29]
	Cercopithecidae	Rhesus macaque	Macaca mulatta	8	[197,251]
		Mandrill	Mandrillus sphinx	43	[71]
	Aotidae	Owl monkey	Aotus nancymaae	8	[252]
	Callitrichidae	Spix's saddle back tamarin	Saguinus fuscicollis fuscicollis	16	[253]
		Illiger's saddle back tamarin	Saguinus fuscicollis illigeri	16	[253]
		Geoffroy's saddle back tamarin	Saguinus fuscicollis nigrifrons	16	[253]
		Cotton top tamarin	Saguinus oedipus oedipus	6	[254]
	Galagidae	Thick tailed bush baby	Galago crassicaedatus	3	[255,256]
	Indriidae	Coquerel's sifaka	Propithecus verreauxi coquereli	8	[64]
	Lemuridae	Ring tailed lemur	Lemur catta	45	[64,69]
Carnivora	Felidae	Cheetah	Acinonyx jubatus	49	[257,258]
		Domestic cat	Felis catus	5	[197,259]
		Ocelot	Leopardus pardalis	4	[197]
		Serval	Leptailurus serval	1	[197]
		Eurasian lynx	Lynx lynx	10	[72]
		Bobcat	Lynx rufus	17	[260]
		Cougar	Puma concolor	31	[197,261]
		Indian leopard cat	Prionailurus bengalensis	3	[197]
		Fishing cat	Prionailurus vivarrina	1	[197]
		African lion	Panthera leo	68	[58,197,261-263]
		Leopard	Panthera pardus	47	[197,259,261,264]
		Tiger	Panthera tigris	33	[197,261,265,266]
		Siberian tiger	Panthera tigris altaica	33	[267]
		Sumatran tiger	Panthera tigris sumatrae	7	[268]
		Bengal tiger	Panthera tigris tigris	36	[151,268]
	Canidae	Domestic dog	Canis familiaris	169	[65,145,150,197,269]
		Coyote	Canis latrans	50	[148,150]
		Grey wolf	Canis lupis	38	[146,147]
		Iberian wolf	Canis lupis signatus	18	[270]
		Black backed jackal	Canis mesomelas	41	[145]
		Maned wolf	Chrysocyon brachyurus	11	[271]
		African wild dog	Lycaon pictus	103	[145]
		Red fox	Vulpes vulpes	21	[262,272-274]
	Herpestidae	Yellow mongoose	Cynictis penicillate	22	[275]
		Small Indian mongoose	Herpestes auropunctatus	6	[276]
		Egyptian mongoose	Herpestes ichneumon	16	[276,277]
	Mephitidae	Western hog-nosed skunk	Conepatus mesoleucus	6	[278]
		Hooded skunk	Mephitis macroura	10	[279]
		Striped skunk	Mephitis mephitis	9	[280,281]
		Spotted skunk	Spilogale putorius	8	[282]
	Mustelidae	European otter	Lutra lutra	34	[283,284]
		Asian short-clawed otter	Aonyx cinereal	41	[284]
		Wolverine	Gulo gulo	14	[285,286]
		Striped weasel	Ictonyx striatus	11	[287,288]
		Canadian river otter	Lontra canadensis	41	[284]
		Stoat	Mustela erminea	9	[289-291]
		Steppe polecat	Mustela eversmanni admirata	9	[292]
		Least weasel	Mustela nivalis	3	[289]
		European polecat	Mustela putorius	9	[197,289,293]
		Ferret	Mustela putorius furo	41	[294,295]
		Siberian weasel	Mustela sibirica fortanieri	9	[292]
		American mink	Mustela vison	6	[289,293,296]
		European pine marten	Martes martes	1	[289]
		European badger	Meles meles	56	[284,297,298]
		Giant otter	Pteronura brasiliensis	19	[284]
	Otariidae	Brown fur seal	Arctocephalus pusillus	4	[299]
	Ursidae	Giant panda	Ailuropoda melanoleuca	21	[300,301]
		Polar bear	Ursus maritimus	4	[299]
	Viverridae	Binturong	Arctictis binturong	1	[197]
		African civet cat	Civettictis civetta	6	[302,303]
		Kenya genet	Genetta tigrina erlangeri	6	[197]
Rodentia	Cricetidae	Golden hamster	Mesocricetus auratus	17	[197,304]
		Pine vole	Microtus pinetorum	23	[305]
		Musk rat	Ondantra zibethicus	9	[303]
		Deer mouse	Peromyscus maniculatus	3	[306]
		Campbell's dwarf hamster	Phodopus campbelli	32	[307]
		Desert hamster	Phodopus roborowsky	22	[307]
		Dwarf hamster	Phodopus sungorus sungorus	105	[307-309]
		European beaver	Castro fiber	15	[310]
	Erethizontidae	North American porcupine	Erethizon dorsatum	14	[311]
	Hystricidae	Crested porcupine	Hystrix cristata	36	[312]
		Indian crested porcupine	Hystrix indica	15	[313]
		Asiatic brush-tailed porcupine	Atherurus macrourus	7	[313]
	Muridae	Southern multimammate mouse	Mastomys natalensis	1	[314]
		Mongolian gerbil	Meriones ungulates	1	[315]
		Common house mouse	Mus musculus	10	[197,316-321]
		Brown rat	Rattus norvegicus	28	[197,299,322,323]
		Black rat	Rattus rattus	6	[70]
	Myocastoridae	Nutria	Myocasot coypus	20	[324]
	Caviidae	Domestic guinea pig	Cavia porcellus	27	[73,197]
Dasyuromorphia	Dasyuridae	Sturt's antechinus	Antechinus stuartii	13	[325]
		Tasmanian devil	Sarcophilus harrisii	8	[326]
Lagomorpha	Leporidae	European rabbit	Oryctolagus cuniculus	38	[197,299,327-329]
Chiroptera	Phyllostomidae	Southern long-nosed bat	Leptonycteris curasoae	19	[67]
	Molossidae	Mexican free-tailed bat	Tatarida brasiliensis mexicana	1	[68]
Diprotodontia	Phascolarctidae	Koala	Pascolarctos cinereus	10	[330]
	Phalangeridae	Common brushtail possum	Trichosurus vulpecula	4	[299]
	Macropodidae	Agile wallaby	Macropus agilus	4	[299]
Monotremata	Ornithorhynchidae	Duck-billed platypus	Ornithorynchus anatinus	3	[299]
	Tachyglossidae	Short-beaked echidna	Tachyglossus aculeatus	3	[299]
Scandentia	Tupaiidae	Tree-shrew	Tupaia belangeri	1	[331]
Eulipotyphla	Erinaceidae	West European hedgehog	Erinaceus europaeus	4	[299]
		Indian long-eared hedgehog	Hemiechinus collaris	7	[313]
Galliformes	Phasianidae	Domestic chicken	Gallus gallus	224	[32,33,49,73,75,163,332]
Charadriiformes	Alcidae	Crested auklet	Aethia cristatella	8	[53,54]
		Whiskered auklet	Aethia pygmaea	4	[54]
Bucerotiformes	Upupidae	European hoopoes	Upipa epops	9	[86]
	Phoeniculidae	Green woodhoopoes	Phoeniculus purpureus	45	[154]
Procellariiformes	Procellariidae	Blue petrels	Halobaena caerulea	10	[51]
